# Supplementary material for: Cisplatin Resistant Spheroids Model Clinically Relevant Survival Mechanisms in Ovarian Tumors
Source: PLoS One. 2016 Mar 17;11(3):e0151089. doi: 10.1371/journal.pone.0151089 (PMC4795743; doi:10.1371/journal.pone.0151089)
Supplement: S2 Table — (XLSX) [file pone.0151089.s002.xlsx]

## Sheet: Sheet1
Table S2. List of all probesets differentially expressed with Fc>2 and q<0.05
Probeset	RefSeq ID	Gene Symbol	Name	R1	R2	R3	R4	S1	S2	S3	S4	pvalue	q	Fc
7951271	NM_002421	MMP1	matrix metallopeptidase 1 (interstitial collagenase)	13.2247	13.2424	13.3642	13.2425	6.27346	5.89409	6.70179	6.66366	3.16721e-08	1.57275e-06	6.88519
8054722	NM_000576	IL1B	interleukin 1, beta	11.6705	11.6964	11.6164	11.8174	5.17003	5.16715	4.91454	4.82563	6.60852e-10	3.29423e-07	6.68085
8131803	NM_000600	IL6	interleukin 6 (interferon, beta 2)	12.0933	12.1275	12.0263	12.127	5.63705	5.47043	5.23405	5.4494	3.16799e-10	3.21741e-07	6.6458
8026490	NR_015379	UCA1	urothelial cancer associated 1 (non-protein coding)	11.991	12.1018	12.0316	12.0514	5.3926	5.22183	5.65743	5.37949	5.18057e-10	3.21741e-07	6.63111
7951686	NM_001562	IL18	interleukin 18 (interferon-gamma-inducing factor)	10.3592	10.6597	10.2735	10.7704	3.95613	3.85906	3.98826	4.04772	3.22857e-09	5.62314e-07	6.55291
8105040	NM_003999	OSMR	oncostatin M receptor	11.2091	11.3561	11.2863	11.3036	4.95246	4.58307	4.65491	4.82435	4.21651e-10	3.21741e-07	6.53509
8120967	NM_002526	NT5E	5'-nucleotidase, ecto (CD73)	11.2573	11.2202	11.1452	11.2039	4.7649	4.664	5.21324	5.21421	1.16206e-08	9.05624e-07	6.2426
8167449	NM_002668	PLP2	proteolipid protein 2 (colonic epithelium-enriched)	12.0127	12.1939	11.9807	12.0397	6.17185	6.45148	5.78228	6.16348	1.46973e-08	1.0157e-06	5.91448
7939341	NM_000610	CD44	CD44 molecule (Indian blood group)	11.7227	11.8202	11.6517	11.7801	5.92572	5.90466	5.71625	5.77986	9.052e-11	2.93297e-07	5.91205
8058765	NM_212482	FN1	fibronectin 1	13.6955	13.8457	13.7288	13.8144	7.56022	7.77541	8.0785	8.19494	1.75621e-08	1.11538e-06	5.8688
8067208	NM_080618	CTCFL	CCCTC-binding factor (zinc finger protein)-like	10.8117	10.9979	10.9071	11.0251	5.20593	4.86815	5.06089	5.4252	7.45973e-09	7.42201e-07	5.79542
8091411	NM_014220	TM4SF1	transmembrane 4 L six family member 1	11.7093	11.5659	11.7258	11.632	5.92534	5.94911	5.9142	5.69328	2.11725e-10	3.04897e-07	5.78776
8124531	NM_003533	HIST1H3I	histone cluster 1, H3i	12.5611	12.4756	12.3825	12.4253	6.49035	7.03797	7.09137	6.68446	2.26395e-08	1.30409e-06	5.63505
7995797	NM_175617	MT1E	metallothionein 1E	11.9503	11.827	11.8849	11.7937	6.1493	6.28129	6.38923	6.17139	1.63467e-10	3.04897e-07	5.6162
8021635	NM_001143818	SERPINB2	serpin peptidase inhibitor, clade B (ovalbumin), member 2	11.5477	11.611	11.4741	11.5853	6.13422	6.14262	5.93643	5.85422	5.28745e-10	3.21741e-07	5.53764
8108217	NM_000358	TGFBI	transforming growth factor, beta-induced, 68kDa	11.211	11.2548	11.1776	11.2714	5.47976	5.93881	5.74256	5.62081	2.28038e-09	4.69396e-07	5.5332
7917875	NM_001993	F3	coagulation factor III (thromboplastin, tissue factor)	11.6116	11.9068	11.761	11.9358	6.19117	6.49723	6.40136	6.1174	5.85335e-09	6.6525e-07	5.502
8104901	NM_002185	IL7R	interleukin 7 receptor	10.2046	10.4893	10.3566	10.4433	5.22366	4.87188	4.95509	4.80802	4.96416e-09	6.30767e-07	5.40878
7927631	NM_012242	DKK1	dickkopf 1 homolog (Xenopus laevis)	11.7353	11.9069	11.6492	11.9489	6.37086	6.58328	6.34086	6.37478	1.4642e-09	4.57242e-07	5.39264
8135069	NM_000602	SERPINE1	serpin peptidase inhibitor, clade E (nexin, plasminogen activator inhibitor type 1), member 1	11.7518	11.6773	11.6054	11.5184	5.9533	6.68915	6.60538	5.98708	1.98908e-07	4.74895e-06	5.32949
7940147	NM_198947	FAM111B	family with sequence similarity 111, member B	9.93378	10.109	9.87233	10.0743	4.58834	4.8828	4.61438	4.6258	1.46306e-09	4.57242e-07	5.31952
8163795	NM_005047	PSMD5	proteasome (prosome, macropain) 26S subunit, non-ATPase, 5	9.58759	9.61022	9.44768	9.54077	4.1267	4.36752	4.09431	4.35171	8.30522e-10	3.67159e-07	5.3115
8025601	NM_000201	ICAM1	intercellular adhesion molecule 1	11.2199	11.3704	11.2161	11.2365	5.55621	6.22188	6.02186	6.0079	2.81806e-08	1.46681e-06	5.30874
7960919	NM_003480	MFAP5	microfibrillar associated protein 5	10.3189	10.3664	10.2643	10.3105	5.38259	4.67116	5.10568	4.95704	3.45677e-08	1.67796e-06	5.28589
7951662	NM_001885	CRYAB	crystallin, alpha B	10.7746	10.9671	10.9073	11.0803	5.79453	5.40806	5.71339	5.72272	4.6414e-09	6.30767e-07	5.27266
8177222	NM_013230	CD24	CD24 molecule	9.5436	9.78592	9.55736	9.8947	4.34589	4.41467	4.49526	4.63446	4.82377e-09	6.30767e-07	5.22282
7908072	NM_005562	LAMC2	laminin, gamma 2	10.8957	10.7691	10.95	10.6566	5.81395	5.77603	5.31608	5.57929	1.76422e-08	1.11538e-06	5.19651
8078544	NM_000249	MLH1	mutL homolog 1, colon cancer, nonpolyposis type 2 (E. coli)	9.84956	10.1306	9.90786	10.1557	4.58346	5.32604	4.54	4.85411	1.95568e-07	4.72005e-06	5.18502
7923378	NM_004078	CSRP1	cysteine and glycine-rich protein 1	10.9388	11.1111	10.9254	11.0919	5.85605	5.6047	6.14585	5.85087	1.12632e-08	9.02237e-07	5.15246
8037251	NM_002783	PSG7	pregnancy specific beta-1-glycoprotein 7 (gene/pseudogene)	10.7252	10.7004	10.6493	10.8346	5.75368	5.46562	5.64012	5.46006	1.05402e-09	3.90305e-07	5.14751
7935058	NM_013451	MYOF	myoferlin	11.612	11.7847	11.6187	11.824	6.67187	6.49306	6.49384	6.60533	4.49248e-10	3.21741e-07	5.14383
8033257	NM_000064	C3	complement component 3	10.8321	11.0447	10.7817	10.9841	5.90325	5.97412	5.77717	5.67804	2.14304e-09	4.69396e-07	5.0775
7902553	NM_006417	IFI44	interferon-induced protein 44	9.32583	9.39522	9.1604	9.47789	4.44354	4.25046	4.28021	4.28837	1.10972e-09	3.99516e-07	5.02419
8092726	NM_021101	CLDN1	claudin 1	11.9488	12.4194	11.8721	12.4909	6.96392	7.22635	7.21344	7.26276	1.10681e-07	3.36444e-06	5.01618
7920291	NM_080388	S100A16	S100 calcium binding protein A16	10.6575	10.796	10.578	10.8101	5.63602	5.97901	5.68442	5.81365	3.41501e-09	5.67441e-07	4.93213
7951372	NM_033306	CASP4	caspase 4, apoptosis-related cysteine peptidase	9.82618	9.9779	9.88911	10.0329	5.03254	5.31391	4.76214	4.99031	1.59348e-08	1.04834e-06	4.90679
8127534	NM_138441	MB21D1	Mab-21 domain containing 1	9.39099	9.5452	9.30121	9.63249	4.58676	4.45126	4.58726	4.8615	1.12953e-08	9.02237e-07	4.84578
7952601	NM_001143820	ETS1	v-ets erythroblastosis virus E26 oncogene homolog 1 (avian)	10.9606	10.9281	11.0428	10.7509	6.06348	6.04848	5.90348	6.42668	2.28696e-08	1.30523e-06	4.81006
7991335	NM_001150	ANPEP	alanyl (membrane) aminopeptidase	10.6223	10.8914	10.6677	10.8143	5.60331	6.46589	5.92119	5.80526	2.93819e-07	5.90547e-06	4.80002
8112202	NM_006622	PLK2	polo-like kinase 2	11.9261	12.0015	11.9781	12.0237	7.25371	7.11461	6.99515	7.3785	2.20483e-09	4.69396e-07	4.79687
7906400	NM_005531	IFI16	interferon, gamma-inducible protein 16	8.99265	9.34025	9.13723	9.46132	4.43183	4.48784	4.36116	4.49372	9.18923e-09	8.33444e-07	4.78922
8008237	NM_002204	ITGA3	integrin, alpha 3 (antigen CD49C, alpha 3 subunit of VLA-3 receptor)	10.7112	11.0648	10.6967	10.9082	6.20487	6.10663	5.83159	6.09267	1.54174e-08	1.03277e-06	4.78631
8175353	NM_001017438	CT45A6	cancer/testis antigen family 45, member A6	9.63143	9.69607	9.52303	9.74339	4.64046	5.16578	5.05595	4.94854	2.13298e-08	1.24525e-06	4.6958
7948229	NM_017611	SLC43A3	solute carrier family 43, member 3	10.3072	10.7787	10.2951	10.7618	5.33911	5.98448	6.02706	6.02326	6.23757e-07	9.18771e-06	4.69224
8014233	NM_001104587	SLFN11	schlafen family member 11	9.17417	9.26478	9.35068	9.26277	4.36358	4.67673	4.73882	4.51655	3.74946e-09	5.85482e-07	4.68918
8174201	NM_018476	BEX1	brain expressed, X-linked 1	9.90065	9.81832	9.95827	9.80771	5.45457	5.18175	4.89176	5.48211	5.75597e-08	2.20712e-06	4.61869
8151931	NM_033512	TSPYL5	TSPY-like 5	9.70463	9.61904	9.69253	9.52424	4.93189	5.23724	5.01278	5.00396	1.63023e-09	4.62255e-07	4.58864
8170052	NM_001017417	CT45A1	cancer/testis antigen family 45, member A1	9.56313	9.65409	9.46264	9.72986	4.6587	5.33745	5.18089	5.06389	1.0942e-07	3.33681e-06	4.5422
8029006	NM_021913	AXL	AXL receptor tyrosine kinase	11.0084	11.0423	11.0614	10.9639	6.60862	6.5546	6.61679	6.16455	1.37888e-08	9.71252e-07	4.53286
8134339	NM_001040152	PEG10	paternally expressed 10	9.67481	9.82113	9.7006	9.76817	5.24872	5.22084	5.28783	5.09186	1.90057e-10	3.04897e-07	4.52886
8127563	NM_004370	COL12A1	collagen, type XII, alpha 1	9.99273	10.2884	10.0888	10.2736	5.36384	5.73538	5.79904	5.66208	2.36707e-08	1.30752e-06	4.52079
8104107	NM_173553	TRIML2	tripartite motif family-like 2	10.1148	10.1332	10.2131	10.2398	5.72462	6.12096	5.56005	5.28087	2.52405e-07	5.40712e-06	4.50361
7955613	NM_005556	KRT7	keratin 7	10.8791	10.8021	10.842	10.7034	6.72852	6.53163	6.26515	5.77007	7.08947e-07	9.95486e-06	4.48282
8140967	NM_017654	SAMD9	sterile alpha motif domain containing 9	9.63174	9.69709	9.64516	9.72906	5.16982	5.21272	5.05406	5.36479	8.36783e-10	3.67159e-07	4.47542
8095680	NM_000584	IL8	interleukin 8	12.4646	12.077	12.301	12.1642	7.86627	8.321	7.46952	7.68718	5.59216e-07	8.57721e-06	4.41572
8117594	NM_003521	HIST1H2BM	histone cluster 1, H2bm	10.2733	10.6905	10.2703	10.8248	5.80371	6.0344	6.23166	6.3309	3.48319e-07	6.44915e-06	4.41456
7981919	NM_022807	SNRPN	small nuclear ribonucleoprotein polypeptide N	9.15111	9.31298	9.24802	9.32839	5.1029	4.8039	4.87708	4.6752	8.38657e-09	7.87641e-07	4.39535
7898655	NM_001785	CDA	cytidine deaminase	10.9045	11.0777	10.8098	10.9452	6.70553	6.15902	6.61489	6.75946	9.82883e-08	3.13765e-06	4.37459
8175336	NM_001017436	CT45A4	cancer/testis antigen family 45, member A4	9.37564	9.45869	9.217	9.45171	4.72113	5.22458	5.08449	5.00592	2.87792e-08	1.48318e-06	4.36673
8058927	NM_022152	TMBIM1	transmembrane BAX inhibitor motif containing 1	11.745	11.7567	11.7179	11.6965	7.4533	7.52597	7.27831	7.19677	2.07217e-09	4.69396e-07	4.36543
8100994	NM_002089	CXCL2	chemokine (C-X-C motif) ligand 2	10.7605	10.8398	10.7906	10.7661	6.15598	6.60033	6.50016	6.4526	8.21054e-09	7.87641e-07	4.36196
8170060	NM_152582	CT45A2	cancer/testis antigen family 45, member A2	9.55598	9.6222	9.43568	9.61931	4.77978	5.6716	5.21134	5.13477	4.2822e-07	7.16124e-06	4.35892
8072876	NM_002305	LGALS1	lectin, galactoside-binding, soluble, 1	13.3319	13.1698	13.2598	13.1402	8.91713	9.17889	8.69642	8.68771	3.51238e-08	1.68601e-06	4.35537
7930208	NM_032727	INA	internexin neuronal intermediate filament protein, alpha	10.5916	10.9646	10.4696	11.0605	6.316	6.3494	6.71738	6.32477	2.58704e-07	5.48763e-06	4.34469
8155802	NM_004293	GDA	guanine deaminase	8.61797	9.22317	8.98659	9.12982	4.39237	4.70332	4.95153	4.53506	3.24618e-07	6.23293e-06	4.34382
8140534	NM_006379	SEMA3C	sema domain, immunoglobulin domain (Ig), short basic domain, secreted, (semaphorin) 3C	10.521	10.7274	10.6448	10.826	6.2675	6.41366	6.23798	6.54796	8.35832e-09	7.87641e-07	4.31304
8103601	NM_001012967	DDX60L	DEAD (Asp-Glu-Ala-Asp) box polypeptide 60-like	8.49995	9.10444	8.73159	9.11885	4.6549	4.49966	4.58296	4.52474	1.43693e-07	3.91248e-06	4.29814
8101429	NM_016619	PLAC8	placenta-specific 8	10.1979	10.2281	10.0458	10.2524	5.98457	5.95303	5.52396	6.23051	1.47652e-07	3.93755e-06	4.25803
7927964	NM_002727	SRGN	serglycin	9.77826	9.88766	9.81815	9.69727	5.59476	5.28443	5.28898	5.98859	2.78274e-07	5.75212e-06	4.25614
8014248	NM_144682	SLFN13	schlafen family member 13	9.24744	9.51668	9.348	9.64213	5.58452	5.30016	5.05442	4.83337	4.32218e-07	7.19099e-06	4.24544
8175344	NM_001007551	CT45A5	cancer/testis antigen family 45, member A5	9.53287	9.5152	9.34192	9.56586	4.89583	5.70055	5.24472	5.18069	3.16819e-07	6.19345e-06	4.23351
7899265	NM_006142	SFN	stratifin	11.3257	11.2519	11.1487	11.1608	7.08802	6.96402	7.21188	6.69572	3.12184e-08	1.56704e-06	4.23187
7902687	NM_001554	CYR61	cysteine-rich, angiogenic inducer, 61	12.0955	12.0454	12.1419	11.9194	7.89207	7.60211	7.97612	7.80706	7.7737e-09	7.57529e-07	4.23123
8141016	NM_006528	TFPI2	tissue factor pathway inhibitor 2	11.37	11.3877	11.426	11.4654	7.03442	7.17154	7.28906	7.2616	6.20617e-10	3.21741e-07	4.22309
8037272	NM_002781	PSG5	pregnancy specific beta-1-glycoprotein 5	9.83694	9.93568	9.72277	10.022	5.70323	5.86918	5.67972	5.52786	9.1958e-09	8.33444e-07	4.18434
7910706	NM_006499	LGALS8	lectin, galactoside-binding, soluble, 8	9.81145	10.1932	9.78574	10.1493	5.83192	5.98721	5.58228	5.86697	8.5641e-08	2.89772e-06	4.16783
8136248	NM_002402	MEST	mesoderm specific transcript	9.57446	9.79742	9.33114	9.91641	4.85406	5.89768	5.60278	5.62723	3.66469e-06	2.74584e-05	4.15942
7957260	NM_006851	GLIPR1	GLI pathogenesis-related 1	10.5212	10.7325	10.5	10.7846	6.31741	6.53091	6.32182	6.79816	7.85001e-08	2.72033e-06	4.14249
8170068	NM_001017435	CT45A3	cancer/testis antigen family 45, member A3	9.48038	9.47559	9.24537	9.4727	4.9825	5.57356	5.34594	5.25571	8.17029e-08	2.81082e-06	4.12908
7982377	NM_013372	GREM1	gremlin 1, DAN family BMP antagonist	10.2872	10.4648	10.2079	10.3237	6.3712	6.24257	6.30811	5.89808	3.79199e-08	1.7305e-06	4.11593
7928429	NM_002658	PLAU	plasminogen activator, urokinase	10.085	10.1821	10.1757	10.1759	6.04058	6.24269	5.94276	5.92932	2.65811e-09	4.92151e-07	4.11584
8155849	NM_000700	ANXA1	annexin A1	13.2877	13.421	13.2761	13.4612	9.16944	9.78733	9.05573	9.12775	4.16142e-07	7.04103e-06	4.07643
7958019	NM_018370	DRAM1	DNA-damage regulated autophagy modulator 1	9.95749	10.3809	10.0262	10.3496	6.05647	5.94913	6.0012	6.4118	1.71675e-07	4.27064e-06	4.07391
8167701	NR_033253	XAGE1A	X antigen family, member 1A	10.3142	10.1786	10.4099	10.1602	6.21132	6.7359	6.23933	5.75639	1.24671e-06	1.4084e-05	4.03
8167710	NR_033253	XAGE1A	X antigen family, member 1A	10.3142	10.1786	10.4099	10.1602	6.21132	6.7359	6.23933	5.75639	1.24671e-06	1.4084e-05	4.03
8172739	NR_033253	XAGE1A	X antigen family, member 1A	10.3142	10.1786	10.4099	10.1602	6.21132	6.7359	6.23933	5.75639	1.24671e-06	1.4084e-05	4.03
8172757	NR_033253	XAGE1A	X antigen family, member 1A	10.3142	10.1786	10.4099	10.1602	6.21132	6.7359	6.23933	5.75639	1.24671e-06	1.4084e-05	4.03
8172766	NR_033253	XAGE1A	X antigen family, member 1A	10.3142	10.1786	10.4099	10.1602	6.21132	6.7359	6.23933	5.75639	1.24671e-06	1.4084e-05	4.03
7934979	NM_014391	ANKRD1	ankyrin repeat domain 1 (cardiac muscle)	11.896	11.8905	11.9983	11.9565	7.92342	8.1111	7.67795	7.96675	1.07743e-08	9.02237e-07	4.01553
8031632	NR_033418	ZNF542	zinc finger protein 542	8.1417	8.394	8.36704	8.60103	4.09941	4.36397	4.39297	4.64487	1.55021e-07	4.06712e-06	4.00064
8107673	NM_023927	GRAMD3	GRAM domain containing 3	8.90711	9.2149	8.95644	9.15988	4.86459	5.23663	5.20713	5.05102	3.71351e-08	1.7232e-06	3.96974
7940153	NM_022074	FAM111A	family with sequence similarity 111, member A	8.62339	9.12628	9.01189	9.18797	4.76748	5.33671	5.01946	5.11281	4.77874e-07	7.69295e-06	3.92827
8068697	NM_002463	MX2	myxovirus (influenza virus) resistance 2 (mouse)	8.74662	9.2202	8.83472	9.06463	5.18133	5.1063	4.98827	4.91387	6.44512e-08	2.35967e-06	3.9191
8131666	NM_002214	ITGB8	integrin, beta 8	9.11607	9.87661	9.13452	9.78284	5.49824	5.69098	5.51836	5.60725	1.53281e-06	1.60729e-05	3.8988
8095697	NM_001511	CXCL1	chemokine (C-X-C motif) ligand 1 (melanoma growth stimulating activity, alpha)	10.5144	10.4748	10.5865	10.4568	6.71365	6.65289	6.62737	6.53754	2.01671e-10	3.04897e-07	3.87526
7995793	NR_001447	MT1L	metallothionein 1L (gene/pseudogene)	11.8595	11.764	11.8118	11.7132	8.17025	7.90226	7.6478	7.92733	3.74198e-08	1.7232e-06	3.87521
8124527	NM_005322	HIST1H1B	histone cluster 1, H1b	10.2445	9.80121	10.1714	9.71195	6.28633	5.87739	6.20569	6.08255	3.23017e-07	6.22987e-06	3.86927
8093104	NM_138461	TM4SF19	transmembrane 4 L six family member 19	9.92063	9.91107	9.97072	9.67863	5.84861	6.18936	6.36757	5.60446	7.28288e-07	1.01068e-05	3.86776
7992071	NM_005823	MSLN	mesothelin	10.2391	10.4699	10.19	10.2937	6.22406	6.35958	6.89545	6.24509	4.56981e-07	7.46862e-06	3.86713
8037267	NM_031246	PSG2	pregnancy specific beta-1-glycoprotein 2	7.22619	7.6157	7.41424	7.82531	3.82984	3.46244	3.43231	3.96199	8.00498e-07	1.06518e-05	3.84871
8054712	NM_000575	IL1A	interleukin 1, alpha	8.45457	8.74013	8.54419	8.77347	4.69347	4.75387	4.91834	4.78805	1.13471e-08	9.02237e-07	3.83966
7991080	NM_001717	BNC1	basonuclin 1	9.10659	9.37621	8.84456	9.51289	5.44489	5.58703	5.1108	5.46564	7.25605e-07	1.00904e-05	3.80797
8086141	NM_014805	EPM2AIP1	EPM2A (laforin) interacting protein 1	8.20112	8.62576	8.3274	8.62485	4.36187	4.71075	4.801	4.68108	1.92319e-07	4.66771e-06	3.80611
8149330	NM_147780	CTSB	cathepsin B	12.3702	12.3978	12.5178	12.2906	8.61858	8.53543	8.71314	8.49532	2.08091e-09	4.69396e-07	3.80351
8048864	NM_004591	CCL20	chemokine (C-C motif) ligand 20	9.9793	9.70886	9.9751	9.62156	5.69334	6.82902	5.58577	5.98774	1.38047e-05	6.71104e-05	3.79724
7982597	NM_003246	THBS1	thrombospondin 1	9.22994	9.41899	9.22714	9.33096	5.50924	5.43377	5.61412	5.50803	9.67352e-10	3.78102e-07	3.78547
8054740	NM_003466	PAX8	paired box 8	10.2129	10.5127	10.1237	10.2722	6.5039	6.41047	6.40396	6.68135	3.13154e-08	1.56704e-06	3.78043
8106210	NM_001080479	ARHGEF28	Rho guanine nucleotide exchange factor (GEF) 28	9.95995	10.1181	9.97355	10.1491	6.26098	6.34781	6.30926	6.28186	4.86147e-10	3.21741e-07	3.75018
8089544	NM_199511	CCDC80	coiled-coil domain containing 80	10.2704	10.4582	10.2635	10.4576	6.55731	6.5623	6.62961	6.71792	2.1407e-09	4.69396e-07	3.74564
8111932	NM_148672	CCL28	chemokine (C-C motif) ligand 28	8.46302	8.67083	8.62351	8.76438	4.89328	5.0335	4.94483	4.82496	5.31842e-09	6.50279e-07	3.70629
8176234	NM_001289	CLIC2	chloride intracellular channel 2	7.94471	8.1931	8.03252	8.27673	4.23629	4.37407	4.20416	4.81149	4.08004e-07	6.97624e-06	3.70526
8149774	NM_002318	LOXL2	lysyl oxidase-like 2	10.7764	10.8807	10.6913	10.828	7.21437	7.42165	6.90126	6.9059	1.47647e-07	3.93755e-06	3.6833
7954090	NM_001423	EMP1	epithelial membrane protein 1	9.61102	9.27385	9.71092	9.1921	5.99706	5.94127	5.53835	5.58666	7.05223e-07	9.91331e-06	3.68113
8083494	NM_007288	MME	membrane metallo-endopeptidase	10.8416	10.7315	10.913	10.8057	7.20253	7.0614	6.97277	7.33413	1.24646e-08	9.07573e-07	3.68026
8118734	NM_002224	ITPR3	inositol 1,4,5-trisphosphate receptor, type 3	10.4273	10.442	10.3395	10.4903	6.7432	6.46866	6.79301	6.97415	4.5407e-08	1.89838e-06	3.68003
8100298	NM_001014446	OCIAD2	OCIA domain containing 2	9.32558	9.12021	8.99342	8.93209	5.67737	5.45086	5.55613	5.04339	5.04163e-07	7.96857e-06	3.66089
8030002	NM_153608	ZNF114	zinc finger protein 114	9.89659	9.96443	10.042	9.88703	6.17815	6.40574	6.30591	6.26133	1.23587e-09	4.32907e-07	3.65972
7981943	NR_022008	PAR5	Prader-Willi/Angelman syndrome-5	7.47318	7.98376	7.77006	7.89778	4.13024	4.06988	4.00482	4.30141	1.25275e-07	3.59211e-06	3.65461
8135990	NM_001458	FLNC	filamin C, gamma	11.2189	11.3177	11.1838	11.2403	7.68744	7.66798	7.61765	7.45046	1.48174e-09	4.57242e-07	3.63428
8135594	NM_001753	CAV1	caveolin 1, caveolae protein, 22kDa	11.5028	11.7314	11.4895	11.7466	7.8952	8.14862	7.82935	8.06234	3.21502e-08	1.57835e-06	3.63368
7981514	NM_138420	AHNAK2	AHNAK nucleoprotein 2	8.9778	9.21844	9.03372	9.17017	5.62171	5.48572	5.39771	5.49091	4.6304e-09	6.30767e-07	3.60102
8022295	NM_022068	PIEZO2	piezo-type mechanosensitive ion channel component 2	9.25493	9.74736	9.52284	9.73517	5.94934	5.73194	6.08987	6.11296	2.8285e-07	5.78216e-06	3.59405
7952341	NM_024769	CLMP	CXADR-like membrane protein	10.2673	10.4423	10.2614	10.3879	6.57153	7.1066	6.79895	6.52462	2.35717e-07	5.16924e-06	3.58929
7917850	NM_004815	ARHGAP29	Rho GTPase activating protein 29	10.6181	10.7659	10.5781	10.8328	7.13177	6.94506	7.13953	7.23439	1.22164e-08	9.05846e-07	3.58601
8094028	NM_198595	AFAP1	actin filament associated protein 1	9.13466	9.82201	9.28919	9.73754	5.76232	6.00189	5.89457	6.02328	9.93647e-07	1.21837e-05	3.57533
8095986	NM_005139	ANXA3	annexin A3	10.5161	10.3884	10.5517	10.3499	6.75051	6.86706	6.80899	7.16537	4.26758e-08	1.83755e-06	3.55351
8060897	NM_001172646	PLCB4	phospholipase C, beta 4	10.7979	11.1099	10.9426	11.2619	7.38136	7.44159	7.54061	7.54548	5.36034e-08	2.13763e-06	3.55082
8178115	NM_001710	CFB	complement factor B	9.86502	9.99601	9.86443	10.1485	6.4788	6.35194	6.41442	6.43493	4.86725e-09	6.30767e-07	3.54846
7992828	NM_001012631	IL32	interleukin 32	10.761	10.9488	10.6579	10.73	7.43607	7.19305	7.4592	6.82159	5.62076e-07	8.61089e-06	3.54695
7999553	NM_018340	CPPED1	calcineurin-like phosphoesterase domain containing 1	9.65028	9.89818	9.61189	9.7748	6.57422	6.20189	5.99075	6.06686	3.16437e-07	6.19345e-06	3.52536
7945371	NM_021034	IFITM3	interferon induced transmembrane protein 3	9.62358	9.98997	9.5802	9.92878	6.34398	6.75812	5.73974	6.20631	5.50626e-06	3.56999e-05	3.51859
8143633	NM_001005328	OR2A7	olfactory receptor, family 2, subfamily A, member 7	8.02162	8.48164	7.98646	8.51522	4.55305	5.06706	4.6771	4.65072	1.26688e-06	1.42292e-05	3.51426
8148553	NM_017527	LY6K	lymphocyte antigen 6 complex, locus K	9.9763	9.74403	10.0255	9.66432	6.28202	6.41457	6.65367	6.06642	4.24746e-07	7.12837e-06	3.49837
8114287	NM_004598	SPOCK1	sparc/osteonectin, cwcv and kazal-like domains proteoglycan (testican) 1	9.63826	9.7502	9.62027	9.59507	6.10372	5.85844	6.20342	6.44869	1.50889e-07	3.9829e-06	3.49738
8172425	NM_033518	SLC38A5	solute carrier family 38, member 5	8.70101	8.8368	8.96063	8.69175	5.60548	5.42287	5.55659	4.62831	6.11829e-06	3.84934e-05	3.49423
7917516	NM_002053	GBP1	guanylate binding protein 1, interferon-inducible	9.18782	9.643	9.17063	9.59363	5.82443	5.45074	5.70452	6.64337	1.89294e-05	8.35611e-05	3.493
8066214	NM_004613	TGM2	transglutaminase 2 (C polypeptide, protein-glutamine-gamma-glutamyltransferase)	10.608	10.7168	10.573	10.7005	7.07083	7.36547	7.10848	7.14684	6.61735e-09	6.97272e-07	3.47667
8129558	NM_030908	OR2A4	olfactory receptor, family 2, subfamily A, member 4	8.03062	8.51712	7.99327	8.51155	4.56882	5.19216	4.67754	4.73645	2.34083e-06	2.04851e-05	3.4694
8134745	NM_012447	STAG3	stromal antigen 3	9.54695	9.73966	9.65747	9.8384	6.22722	6.62235	6.05004	6.04828	4.12747e-07	7.00363e-06	3.45865
7982117	NM_033223	GABRG3	gamma-aminobutyric acid (GABA) A receptor, gamma 3	8.71921	8.99171	8.84659	9.06212	5.31712	5.3652	5.51293	5.66675	7.07393e-08	2.51874e-06	3.43941
8118345	NM_001710	CFB	complement factor B	9.74539	9.85998	9.77327	10.066	6.43068	6.40017	6.43776	6.42689	6.13998e-09	6.74385e-07	3.4373
8117408	NM_021052	HIST1H2AE	histone cluster 1, H2ae	8.09393	7.67457	8.28663	7.76374	4.18235	5.03611	4.26503	4.67469	8.2216e-06	4.67148e-05	3.41517
8129562	NM_001901	CTGF	connective tissue growth factor	11.0794	10.7736	10.975	10.475	7.66299	7.39195	7.11589	7.4814	1.18487e-06	1.38347e-05	3.41268
8016532	NM_031498	GNGT2	guanine nucleotide binding protein (G protein), gamma transducing activity polypeptide 2	7.90945	7.97339	7.99866	8.10163	4.75553	4.34811	4.56732	4.68804	3.77604e-08	1.72931e-06	3.40603
7951133	NM_032427	MAML2	mastermind-like 2 (Drosophila)	9.65757	10.0528	9.58019	10.2316	6.37078	6.45231	6.47475	6.67367	9.98313e-07	1.22294e-05	3.38768
7946334	NM_176821	NLRP10	NLR family, pyrin domain containing 10	8.28932	8.39526	8.52078	8.24576	4.8661	5.34887	5.18035	4.51751	2.22313e-06	1.98027e-05	3.38457
7946142	NM_145040	PRKCDBP	protein kinase C, delta binding protein	9.92935	9.84628	9.92783	9.70471	6.53156	6.92827	6.31088	6.15043	1.33536e-06	1.47294e-05	3.37175
7946661	NM_015881	DKK3	dickkopf 3 homolog (Xenopus laevis)	10.2588	10.2123	10.3184	10.1334	6.76192	6.95513	6.82394	6.93494	2.22571e-09	4.69396e-07	3.36175
8102950	NM_003866	INPP4B	inositol polyphosphate-4-phosphatase, type II, 105kDa	10.5888	10.7952	10.6738	10.843	7.29018	7.17019	7.54111	7.5612	9.50605e-08	3.09557e-06	3.33454
8175871	NM_000425	L1CAM	L1 cell adhesion molecule	9.17903	9.47337	9.26374	9.37133	5.94239	6.23957	6.02503	5.76386	1.28848e-07	3.64675e-06	3.32916
8006531	NM_144975	SLFN5	schlafen family member 5	10.2158	10.3694	10.3292	10.3532	7.01865	7.02768	6.86673	7.0623	1.46807e-09	4.57242e-07	3.32306
7924029	NM_001017402	LAMB3	laminin, beta 3	9.57527	9.64258	9.65416	9.46678	6.3036	6.42782	6.28431	6.1267	9.43667e-09	8.43478e-07	3.29909
8037283	NM_002780	PSG4	pregnancy specific beta-1-glycoprotein 4	9.53792	9.84574	9.45739	9.54563	6.1256	6.45642	6.62119	5.98984	1.16194e-06	1.36058e-05	3.2984
8180166	NM_003190	TAPBP	TAP binding protein (tapasin)	10.7882	11.2051	10.748	10.9869	7.6207	7.48068	7.87377	7.56832	3.05749e-07	6.04988e-06	3.29615
7965040	NM_007350	PHLDA1	pleckstrin homology-like domain, family A, member 1	9.63817	9.6132	9.75829	9.7655	6.37222	6.59563	6.34675	6.28219	1.2592e-08	9.1068e-07	3.2946
8007643	NM_001145080	C17orf104	chromosome 17 open reading frame 104	8.41953	8.666	8.49324	8.64103	5.2702	5.44453	5.0066	5.33395	9.335e-08	3.05582e-06	3.29113
8095376	NM_005953	MT2A	metallothionein 2A	13.7064	13.7772	13.7373	13.7264	10.5722	10.5362	10.293	10.4051	4.26109e-09	6.11538e-07	3.2852
8018966	NM_003255	TIMP2	TIMP metallopeptidase inhibitor 2	10.4477	10.6542	10.3949	10.4931	7.17239	6.94268	7.30936	7.48266	2.25917e-07	5.03094e-06	3.2707
8117426	NM_003524	HIST1H2BH	histone cluster 1, H2bh	11.7317	11.9022	11.7247	11.988	8.56379	8.30535	8.56164	8.85944	2.69919e-07	5.66067e-06	3.26412
8145977	NM_021623	PLEKHA2	pleckstrin homology domain containing, family A (phosphoinositide binding specific) member 2	10.101	10.1439	10.208	10.0828	6.8411	6.86321	6.81077	6.99167	7.38192e-10	3.54347e-07	3.25725
8115327	NM_003118	SPARC	secreted protein, acidic, cysteine-rich (osteonectin)	12.4938	12.7477	12.5457	12.754	9.28892	9.51309	9.31285	9.41613	2.11805e-08	1.24214e-06	3.25252
7995783	NM_005953	MT2A	metallothionein 2A	14.4182	14.5022	14.4535	14.4194	11.4895	11.1082	10.9361	11.257	1.58754e-07	4.11461e-06	3.25059
8178977	NM_172208	TAPBP	TAP binding protein (tapasin)	10.7452	11.1811	10.7125	10.9738	7.61031	7.47971	7.87926	7.69038	3.87216e-07	6.82793e-06	3.23824
8103563	NM_017631	DDX60	DEAD (Asp-Glu-Ala-Asp) box polypeptide 60	7.91584	8.34176	7.90966	8.29521	4.90954	5.0444	4.77205	4.83379	2.99763e-07	5.97706e-06	3.22568
8082100	NM_017554	PARP14	poly (ADP-ribose) polymerase family, member 14	7.52289	8.22303	7.38416	8.11024	4.66332	4.47133	4.68627	4.57247	5.6228e-06	3.61154e-05	3.21173
8095362	NM_005953	MT2A	metallothionein 2A	14.1565	14.209	14.1713	14.1158	11.1256	11.0268	10.7831	10.9114	1.2314e-08	9.06796e-07	3.20144
8021653	NM_002640	SERPINB8	serpin peptidase inhibitor, clade B (ovalbumin), member 8	9.24581	9.37172	9.36951	9.34906	6.62921	6.24341	5.90455	5.76312	3.30599e-06	2.56111e-05	3.19895
8059878	NM_024726	IQCA1	IQ motif containing with AAA domain 1	7.95972	8.16924	7.91235	8.40688	5.23469	4.92231	4.70823	4.85012	9.92132e-07	1.21767e-05	3.18321
8054377	NM_201555	FHL2	four and a half LIM domains 2	11.2085	11.3296	11.2135	11.2549	8.11603	8.22407	8.03365	7.95922	4.28547e-09	6.11538e-07	3.16839
8123951	NM_001143948	ADTRP	androgen-dependent TFPI-regulating protein	8.67538	8.69009	8.88864	8.72179	5.83087	5.39411	5.22342	5.87046	1.43861e-06	1.54512e-05	3.16426
8162759	NM_018421	TBC1D2	TBC1 domain family, member 2	9.46495	9.57603	9.37818	9.61044	6.93396	6.27401	6.08298	6.13607	4.60804e-06	3.18861e-05	3.15064
8048870	NM_178821	DAW1	dynein assembly factor with WDR repeat domains 1	7.88113	7.99507	8.01002	7.82512	4.90681	4.9072	4.49851	4.81345	1.00822e-07	3.19488e-06	3.14634
8066493	NM_003064	SLPI	secretory leukocyte peptidase inhibitor	8.91573	9.04945	8.82235	9.02128	5.94491	6.16988	5.76154	5.36373	2.14533e-06	1.9471e-05	3.14219
8022283	NM_022068	PIEZO2	piezo-type mechanosensitive ion channel component 2	7.71219	8.29945	7.97654	7.98586	5.02161	4.90149	4.90055	4.60754	7.48953e-07	1.01749e-05	3.13572
7922846	NM_052966	FAM129A	family with sequence similarity 129, member A	9.04651	9.49616	9.29522	9.48286	6.2502	6.16257	6.27723	6.12423	1.33235e-07	3.70557e-06	3.12663
8169115	NM_198465	NRK	Nik related kinase	7.91663	8.11819	8.06499	8.20007	4.75038	5.34325	4.90799	4.79621	7.32597e-07	1.01173e-05	3.12551
8080714	NM_001164317	FLNB	filamin B, beta	11.493	11.5088	11.5551	11.4305	8.40286	8.17906	8.46613	8.4589	1.02295e-08	8.78012e-07	3.12008
8090433	NM_007283	MGLL	monoglyceride lipase	9.25108	9.36566	9.36188	9.27798	6.29434	6.35813	6.11364	6.01271	2.71666e-08	1.4488e-06	3.11944
7943998	NM_006169	NNMT	nicotinamide N-methyltransferase	9.85	9.94443	9.82459	9.72744	6.88756	6.72316	6.74605	6.53166	2.8907e-08	1.48318e-06	3.11451
7917754	NM_003567	BCAR3	breast cancer anti-estrogen resistance 3	9.29863	9.34538	9.15042	9.31738	6.08033	6.41292	6.06362	6.12665	4.683e-08	1.93911e-06	3.10707
8067279	NM_001336	CTSZ	cathepsin Z	9.9344	9.60317	9.8598	9.37047	6.19281	7.20601	6.71122	6.23251	2.61692e-05	0.000104938	3.10632
8090852	NM_016201	AMOTL2	angiomotin like 2	9.59286	9.65313	9.73272	9.54473	6.59055	6.35771	6.50487	6.66479	1.61457e-08	1.05685e-06	3.10138
7997504	NM_001257	CDH13	cadherin 13, H-cadherin (heart)	9.31225	9.40388	9.22339	9.38853	6.07094	6.23554	6.38572	6.23265	1.50124e-08	1.02151e-06	3.1008
8076704	NM_148674	SMC1B	structural maintenance of chromosomes 1B	7.71212	7.94124	7.65626	7.86935	4.43743	4.90885	4.47253	4.99702	1.22537e-06	1.40185e-05	3.09078
7950899	NM_022337	RAB38	RAB38, member RAS oncogene family	8.77333	9.08334	8.85747	9.02539	5.94704	5.93645	5.69769	5.81397	4.97148e-08	2.03902e-06	3.0861
8124394	NM_021062	HIST1H2BB	histone cluster 1, H2bb	8.38243	8.40575	8.25134	8.38846	5.3291	5.61966	5.09481	5.04622	4.79273e-07	7.6972e-06	3.08455
8025402	NM_139314	ANGPTL4	angiopoietin-like 4	9.11283	9.02725	8.92689	8.84051	5.71848	6.16753	5.82306	5.8659	1.6124e-07	4.11461e-06	3.08313
7995787	NM_176870	MT1M	metallothionein 1M	9.58563	9.37118	9.53735	9.42477	6.33962	6.43724	6.38934	6.42697	1.98055e-09	4.69396e-07	3.08144
7948667	NM_001620	AHNAK	AHNAK nucleoprotein	10.7589	10.7732	10.8585	10.6722	7.54058	7.72249	7.74828	7.80278	8.35717e-09	7.87641e-07	3.06217
7962579	NM_001143668	AMIGO2	adhesion molecule with Ig-like domain 2	8.29741	9.00646	8.59661	9.02637	5.5749	5.95946	5.48717	5.67799	5.43471e-06	3.54845e-05	3.05683
8037290	NM_002784	PSG9	pregnancy specific beta-1-glycoprotein 9	9.44232	9.52322	9.14199	9.35855	6.73841	5.85267	6.6175	6.04108	1.15652e-05	5.91754e-05	3.05411
8143327	NM_022750	PARP12	poly (ADP-ribose) polymerase family, member 12	9.10042	9.0784	9.04324	9.01591	6.04852	6.27159	6.01972	5.70928	2.12655e-07	4.9273e-06	3.04721
7995813	NR_027781	MT1DP	metallothionein 1D, pseudogene	11.2326	11.3264	11.2035	11.2832	8.42146	8.14172	8.11123	8.2143	1.5054e-08	1.02151e-06	3.03925
8132860	NM_005228	EGFR	epidermal growth factor receptor	9.66467	10.0061	9.74662	9.80282	6.86932	6.65089	6.63397	6.90989	9.65783e-08	3.1137e-06	3.03904
8104601	NM_006317	BASP1	brain abundant, membrane attached signal protein 1	11.4448	11.6055	11.4968	11.5236	8.63241	8.47115	8.48747	8.37232	5.57542e-09	6.50995e-07	3.02682
8112342	NM_197941	ADAMTS6	ADAM metallopeptidase with thrombospondin type 1 motif, 6	8.73707	9.13904	8.83538	9.20653	5.93079	6.06002	6.02397	5.80626	3.68383e-07	6.63949e-06	3.02425
8162586	NM_007001	SLC35D2	solute carrier family 35, member D2	7.68966	7.64651	7.65517	7.82451	4.7819	4.73251	4.68147	4.53454	8.33507e-09	7.87641e-07	3.02136
8022310	NM_022068	PIEZO2	piezo-type mechanosensitive ion channel component 2	8.09217	8.32411	8.04196	8.34635	5.60866	5.25748	5.03575	4.89475	2.43999e-06	2.10403e-05	3.00199
7977397	NM_001312	CRIP2	cysteine-rich protein 2	10.2387	10.3744	10.0786	10.2881	7.13403	7.2926	7.35289	7.28014	2.07748e-08	1.2408e-06	2.98003
8123678	NM_183373	PXDC1	PX domain containing 1	9.70101	9.75241	9.78088	9.79241	6.6204	6.97136	6.56564	6.96396	1.74181e-07	4.32025e-06	2.97634
8160559	NM_014314	DDX58	DEAD (Asp-Glu-Ala-Asp) box polypeptide 58	9.03767	9.38448	9.04456	9.36746	6.11163	6.3577	6.34244	6.12139	2.55942e-07	5.45583e-06	2.97525
7963567	NM_002273	KRT8	keratin 8	12.5516	12.4582	12.5361	12.397	9.51346	9.69081	9.52269	9.33126	2.89759e-08	1.48318e-06	2.97118
8030946	NM_001039886	ZNF808	zinc finger protein 808	8.92914	8.65463	8.55609	8.65918	5.40439	6.19015	5.53044	5.95747	6.34888e-06	3.93601e-05	2.92915
8142981	NM_001018111	PODXL	podocalyxin-like	10.71	10.7251	10.7245	10.7079	7.6832	7.77543	7.87174	7.82723	4.90396e-10	3.21741e-07	2.92749
8124518	NM_021066	HIST1H2AJ	histone cluster 1, H2aj	6.66449	6.56149	6.71431	6.67899	3.63649	3.83235	3.75902	3.71402	2.28169e-09	4.69396e-07	2.91935
8053417	NM_001747	CAPG	capping protein (actin filament), gelsolin-like	9.57546	9.35954	9.61205	9.28553	6.72932	6.51883	6.40553	6.51613	1.42926e-07	3.89979e-06	2.91569
8085393	NM_018306	TMEM40	transmembrane protein 40	8.68153	8.64814	8.68997	8.54238	5.95271	5.78703	5.67943	5.51923	9.33684e-08	3.05582e-06	2.90591
8046333	NM_024843	CYBRD1	cytochrome b reductase 1	10.7827	10.7265	10.8245	10.6848	7.64822	7.93184	7.7518	8.08591	1.22673e-07	3.5489e-06	2.90015
8079950	NM_002070	GNAI2	guanine nucleotide binding protein (G protein), alpha inhibiting activity polypeptide 2	11.317	11.222	11.3697	11.1976	8.37532	8.32113	8.48506	8.37128	2.59475e-09	4.92151e-07	2.88839
7979824	NM_001130004	ACTN1	actinin, alpha 1	12.9332	13.0551	12.9006	13.035	10.0792	10.1363	10.0733	10.0898	5.07926e-10	3.21741e-07	2.88633
7959330	NM_144668	WDR66	WD repeat domain 66	9.07878	9.12186	9.20962	9.02797	6.15415	6.25289	6.30668	6.18687	2.14814e-09	4.69396e-07	2.88442
8036309	NM_133466	ZFP82	ZFP82 zinc finger protein	7.23427	7.87915	7.46594	7.60211	4.84715	4.71198	4.54626	4.53953	1.46988e-06	1.56923e-05	2.88414
8017547	NM_001099786	ICAM2	intercellular adhesion molecule 2	8.96141	9.25055	8.96087	9.15259	6.03947	6.40078	6.18209	6.21057	1.45546e-07	3.93052e-06	2.87313
8161044	NM_003289	TPM2	tropomyosin 2 (beta)	9.97273	10.1636	10.155	10.3465	7.3626	7.15752	7.41163	7.23559	9.30467e-08	3.05582e-06	2.86763
7974316	NM_001042481	FRMD6	FERM domain containing 6	9.70617	9.83896	9.75327	9.82558	7.01125	7.01659	6.72799	6.94468	2.11807e-08	1.24214e-06	2.85587
7933312	NM_001098845	ANXA8L1	annexin A8-like 1	8.82643	8.83348	8.80138	8.69525	6.04156	6.03748	6.08282	5.60451	3.20974e-07	6.21727e-06	2.84754
8006820	NM_006148	LASP1	LIM and SH3 protein 1	10.6136	10.6846	10.6845	10.5667	7.7468	7.88776	7.70141	7.86564	3.07996e-09	5.46821e-07	2.83695
8015635	NM_012232	PTRF	polymerase I and transcript release factor	8.81481	8.95595	8.62999	8.63682	6.11654	5.71391	5.9313	5.93805	2.73188e-07	5.70155e-06	2.83444
8048940	NM_001080391	SP100	SP100 nuclear antigen	7.576	8.24224	7.79151	8.2615	4.92888	5.68513	5.12737	4.80171	3.44116e-05	0.000126993	2.83204
8062927	NM_002638	PI3	peptidase inhibitor 3, skin-derived	9.75969	9.37646	9.60248	9.44421	6.81366	6.8667	6.79133	6.39832	8.58097e-07	1.11356e-05	2.82821
7967202	NM_019034	RHOF	ras homolog family member F (in filopodia)	9.57305	9.5935	9.57409	9.42122	6.93856	6.48411	6.8908	6.53839	4.6654e-07	7.56116e-06	2.8275
8013272	NM_014695	CCDC144A	coiled-coil domain containing 144A	8.62225	8.82292	8.65278	8.85427	5.8558	5.92052	5.94792	5.92797	7.50187e-09	7.42201e-07	2.825
7983512	NM_021199	SQRDL	sulfide quinone reductase-like (yeast)	8.29888	8.31975	8.30615	8.31772	5.51975	5.35687	5.55279	5.51617	9.91894e-10	3.78102e-07	2.82423
8075910	NM_002872	RAC2	ras-related C3 botulinum toxin substrate 2 (rho family, small GTP binding protein Rac2)	9.51577	9.58246	9.60774	9.49415	6.74805	7.13144	6.60199	6.5249	9.1304e-07	1.15224e-05	2.79843
7949532	NM_005438	FOSL1	FOS-like antigen 1	10.9596	11.0576	10.5086	10.9189	8.33861	7.69976	8.48929	7.74243	2.19626e-05	9.26586e-05	2.79365
8002303	NM_000903	NQO1	NAD(P)H dehydrogenase, quinone 1	10.701	11.0239	10.788	11.0034	7.99431	8.55463	7.95122	7.85937	4.07625e-06	2.93445e-05	2.78918
8074980	NM_000853	GSTT1	glutathione S-transferase theta 1	8.51451	8.52856	8.15916	8.50602	5.27753	5.90795	5.58329	5.79341	2.7347e-06	2.25609e-05	2.78652
8038407	NM_006270	RRAS	related RAS viral (r-ras) oncogene homolog	11.5413	11.7957	11.5073	11.7089	8.83746	8.92722	8.77212	8.87497	2.72756e-08	1.4488e-06	2.78533
7946292	NM_016229	CYB5R2	cytochrome b5 reductase 2	9.07502	9.09378	8.82695	9.13477	6.13674	6.16513	6.57153	6.12546	6.23752e-07	9.18771e-06	2.78291
8024572	NM_002068	GNA15	guanine nucleotide binding protein (G protein), alpha 15 (Gq class)	8.69803	8.8398	8.63461	8.61824	5.59754	6.39605	5.71991	5.96115	5.18037e-06	3.4431e-05	2.77901
7950641	NM_023930	KCTD14	potassium channel tetramerisation domain containing 14	9.52471	9.74799	9.38915	9.66617	6.85081	6.76393	6.90815	6.69524	8.76633e-08	2.93582e-06	2.77747
8120719	NM_133493	CD109	CD109 molecule	9.82239	9.94815	9.82942	9.98038	7.0282	7.07304	7.11391	7.26267	1.10455e-08	9.02237e-07	2.77563
8163328	NM_001146108	PTGR1	prostaglandin reductase 1	7.7184	7.973	7.91661	8.11833	5.05499	5.31947	5.33071	4.92085	7.11753e-07	9.9745e-06	2.77508
8023727	NM_032160	DSEL	dermatan sulfate epimerase-like	7.97148	8.39148	8.01748	8.19267	5.32368	5.3703	5.36013	5.44386	1.36138e-07	3.76356e-06	2.76878
7927827	NM_032578	MYPN	myopalladin	7.7249	8.19355	7.78079	8.32844	5.06025	5.41391	5.41691	5.06764	4.91962e-06	3.31042e-05	2.76724
8044605	NR_015377	LOC654433	uncharacterized LOC654433	7.22905	7.4819	7.51234	7.44054	4.46506	4.84816	4.60382	4.69423	1.74697e-07	4.32087e-06	2.76314
8179351	NM_001710	CFB	complement factor B	9.78621	9.87961	9.77892	9.81961	7.3277	7.12395	6.97213	6.84957	2.12418e-07	4.9273e-06	2.74775
7979710	NM_016445	PLEK2	pleckstrin 2	9.20298	9.25132	9.17231	9.384	6.66718	6.5711	6.55494	6.29445	9.97164e-08	3.16759e-06	2.73073
8001531	NM_005950	MT1G	metallothionein 1G	11.6185	11.7236	11.6087	11.6645	9.03719	8.9913	8.91692	8.7781	9.71143e-09	8.56227e-07	2.72297
8083092	NM_001080412	ZBTB38	zinc finger and BTB domain containing 38	10.4757	10.7202	10.5614	10.7095	7.96871	7.82658	7.8672	7.91616	1.46282e-08	1.0157e-06	2.72204
8005204	NM_014695	CCDC144A	coiled-coil domain containing 144A	7.88655	8.21377	8.07271	8.19146	5.22932	5.22572	5.54934	5.48048	3.31574e-07	6.30532e-06	2.71991
8124440	NM_003534	HIST1H3G	histone cluster 1, H3g	8.36189	8.05881	8.19678	7.81605	5.48148	5.37356	5.60148	5.15145	1.85879e-06	1.80052e-05	2.70639
8105411	NM_139017	IL31RA	interleukin 31 receptor A	7.75178	7.99055	7.93874	7.80734	5.14562	5.13351	5.46587	4.93078	6.01899e-07	8.99762e-06	2.70316
8018975	NM_005567	LGALS3BP	lectin, galactoside-binding, soluble, 3 binding protein	9.44973	9.7341	9.31473	9.57702	6.80145	6.45001	6.90214	7.12628	3.5467e-06	2.69919e-05	2.69892
8125713	NM_003190	TAPBP	TAP binding protein (tapasin)	9.77025	10.2966	9.83705	10.0791	7.27357	7.15257	7.28752	7.4761	1.13762e-06	1.34038e-05	2.69831
7947230	NM_170732	BDNF	brain-derived neurotrophic factor	7.462	8.02849	7.5756	7.80758	5.08078	4.91962	5.13041	4.95525	1.04462e-06	1.2665e-05	2.6969
8059413	NM_014689	DOCK10	dedicator of cytokinesis 10	7.51036	7.8858	7.5694	7.93999	4.88112	5.05159	5.07024	5.124	5.33729e-07	8.27442e-06	2.69465
8174513	NM_145234	CHRDL1	chordin-like 1	10.1825	10.1162	10.1566	10.0993	7.68489	7.26788	7.48486	7.35939	1.07736e-07	3.31667e-06	2.68939
8109093	NM_014945	ABLIM3	actin binding LIM protein family, member 3	9.25054	9.4033	9.2088	9.43607	6.40103	6.79454	6.88091	6.4774	8.38142e-07	1.09947e-05	2.68621
8011027	NM_001080779	MYO1C	myosin IC	11.172	11.3627	11.1959	11.2431	8.60936	8.5248	8.55752	8.54223	1.73504e-09	4.6848e-07	2.68495
8113130	NM_024717	MCTP1	multiple C2 domains, transmembrane 1	8.56231	8.80659	8.61733	8.8975	5.87598	6.25691	6.30288	5.7526	2.72929e-06	2.2545e-05	2.67385
7950492	NM_001039548	KLHL35	kelch-like family member 35	9.5207	9.52136	9.32962	9.55754	7.08335	6.70472	6.81128	6.67534	2.66039e-07	5.60652e-06	2.66363
8124534	NM_003546	HIST1H4L	histone cluster 1, H4l	9.77768	9.65074	9.53977	9.63031	7.1321	6.9081	6.99789	6.92456	2.37079e-08	1.30752e-06	2.65896
8103226	NM_152680	TMEM154	transmembrane protein 154	8.14168	8.64199	8.22167	8.73738	5.81033	5.60375	5.77892	5.92625	3.41348e-06	2.62089e-05	2.65587
7954065	NM_003979	GPRC5A	G protein-coupled receptor, family C, group 5, member A	9.59757	9.55338	9.49677	9.36835	6.88136	6.65579	7.13205	6.74611	4.3704e-07	7.24373e-06	2.65019
8015268	NM_021013	KRT34	keratin 34	8.58873	8.00569	8.35484	8.09168	5.77134	5.9316	5.66478	5.09386	2.30251e-05	9.57695e-05	2.64484
7934570	NM_001014797	KCNMA1	potassium large conductance calcium-activated channel, subfamily M, alpha member 1	7.99675	7.94031	7.97349	8.12724	5.39435	5.35506	5.42427	5.28568	3.34077e-09	5.62314e-07	2.64461
8007620	NM_002087	GRN	granulin	11.6319	11.6359	11.5263	11.5562	8.76454	8.56734	9.2637	9.17673	4.19564e-06	2.99272e-05	2.64451
8008388	NM_022827	SPATA20	spermatogenesis associated 20	9.57247	9.5561	9.54156	9.5978	7.1457	6.79947	6.71622	7.0611	2.39275e-07	5.22957e-06	2.63636
8124798	NM_133471	PPP1R18	protein phosphatase 1, regulatory subunit 18	9.53835	9.57444	9.20372	9.61491	7.02354	6.55663	6.985	6.83878	1.57917e-06	1.63866e-05	2.63187
7931810	NM_001300	KLF6	Kruppel-like factor 6	10.1287	9.89489	10.0864	9.98784	7.3055	7.3878	7.46659	7.41366	1.16231e-08	9.05624e-07	2.63106
7979813	NM_004926	ZFP36L1	ZFP36 ring finger protein-like 1	10.7393	11.2348	10.6894	11.2614	8.3037	8.30826	8.35708	8.45082	3.05249e-06	2.42045e-05	2.62627
8044008	NM_003854	IL1RL2	interleukin 1 receptor-like 2	7.27885	7.77589	7.32773	7.7646	4.92698	5.01739	5.08439	4.61692	4.68638e-06	3.22047e-05	2.62534
7957298	NM_014903	NAV3	neuron navigator 3	8.17164	8.2028	7.96007	8.34948	5.45195	5.77833	5.36888	5.58587	6.00054e-07	8.99762e-06	2.62474
7989335	NM_001002858	ANXA2	annexin A2	12.1903	12.2394	12.1304	12.2137	9.5555	9.82548	9.48365	9.4339	1.11441e-07	3.36675e-06	2.61885
8093336	NM_003441	ZNF141	zinc finger protein 141	7.77443	8.63316	8.02495	8.63328	5.51878	5.87393	5.51	5.69118	3.05739e-05	0.000117394	2.61798
8178435	NM_003897	IER3	immediate early response 3	12.7458	12.7368	12.8138	12.6981	10.1098	10.1193	10.1849	10.1111	1.54351e-10	3.04897e-07	2.61736
8124848	NM_003897	IER3	immediate early response 3	12.4568	12.4943	12.5107	12.4809	9.82823	9.93163	9.87206	9.88274	4.2021e-11	1.81538e-07	2.60701
8179704	NM_003897	IER3	immediate early response 3	12.4568	12.4943	12.5107	12.4809	9.82823	9.93163	9.87206	9.88274	4.2021e-11	1.81538e-07	2.60701
7996081	NM_201524	GPR56	G protein-coupled receptor 56	8.56557	8.80267	8.26537	8.68142	6.30111	6.01549	5.88483	5.70981	4.86933e-06	3.30064e-05	2.60095
7976443	NM_001130080	IFI27	interferon, alpha-inducible protein 27	9.16527	8.84138	9.04279	8.61366	6.54259	5.92101	6.23313	6.56732	1.07569e-05	5.63066e-05	2.59976
8163637	NM_002160	TNC	tenascin C	9.03536	9.22773	9.03147	9.22194	6.51843	6.33467	6.69892	6.57327	1.45606e-07	3.93052e-06	2.5978
8098439	NM_002354	EPCAM	epithelial cell adhesion molecule	7.40027	7.71308	7.56212	8.10495	4.88778	4.90309	5.06706	5.538	1.9075e-05	8.40606e-05	2.59612
7940565	NM_004265	FADS2	fatty acid desaturase 2	9.8926	10.3026	9.9327	10.2316	7.44263	7.30656	7.53139	7.70578	1.19045e-06	1.38408e-05	2.5933
8158240	NM_021109	TMSB4X	thymosin beta 4, X-linked	10.1643	10.2701	10.1955	10.3825	7.6065	7.66565	7.4708	7.89948	2.40959e-07	5.23382e-06	2.59252
7952205	NM_006500	MCAM	melanoma cell adhesion molecule	9.3979	9.67259	9.45553	9.48723	6.89218	6.7458	7.04828	6.96595	9.82895e-08	3.13765e-06	2.59026
7960744	NM_001733	C1R	complement component 1, r subcomponent	9.40179	9.43844	9.3089	9.29412	6.75801	6.80749	6.60472	6.936	4.64836e-08	1.93715e-06	2.58426
8075310	NM_002309	LIF	leukemia inhibitory factor	8.57749	8.57037	8.70143	8.61142	6.26483	6.03945	6.11253	5.76134	3.95e-07	6.91813e-06	2.57064
8066513	NM_002999	SDC4	syndecan 4	11.0395	10.8057	10.9759	10.8428	8.47972	8.40876	8.19886	8.29713	7.41924e-08	2.61297e-06	2.56985
8135587	NM_001233	CAV2	caveolin 2	10.1811	10.1827	10.1375	10.1294	7.59629	7.63652	7.45567	7.6941	5.08537e-09	6.39895e-07	2.56205
8094609	NM_138389	FAM114A1	family with sequence similarity 114, member A1	9.37677	9.54079	9.46358	9.41394	6.88182	6.65641	6.99416	7.01471	1.20177e-07	3.49228e-06	2.56199
8083090	NM_001080412	ZBTB38	zinc finger and BTB domain containing 38	11.9452	12.0228	11.932	12.012	9.40115	9.29974	9.48253	9.48975	3.70363e-09	5.85379e-07	2.55971
8104506	NM_007118	TRIO	trio Rho guanine nucleotide exchange factor	11.0609	11.1397	11.0543	11.1292	8.5625	8.44001	8.62956	8.52168	2.12858e-09	4.69396e-07	2.55758
8133721	NM_001540	HSPB1	heat shock 27kDa protein 1	12.7029	12.7872	12.6827	12.6859	10.1778	10.2103	10.2503	10.0145	8.57655e-09	7.93977e-07	2.55147
7973336	NM_004995	MMP14	matrix metallopeptidase 14 (membrane-inserted)	8.70247	8.8455	8.65956	8.81209	6.36566	5.97487	6.60637	5.90634	5.89497e-06	3.73239e-05	2.54159
8011407	NM_014604	TAX1BP3	Tax1 (human T-cell leukemia virus type I) binding protein 3	9.7723	10.0697	10.0022	9.84775	7.31411	7.20636	7.33527	7.67258	7.93193e-07	1.05982e-05	2.54093
8035813	NM_003423	ZNF43	zinc finger protein 43	6.99092	7.3566	6.87985	7.38904	4.60011	4.60618	4.55691	4.72783	1.39722e-06	1.51919e-05	2.53135
7967002	NM_001080855	PXN	paxillin	9.50056	9.75026	9.42674	9.73232	7.27376	6.82974	7.14016	7.05342	9.02383e-07	1.1442e-05	2.5282
8110932	NM_003966	SEMA5A	sema domain, seven thrombospondin repeats (type 1 and type 1-like), transmembrane domain (TM) and short cytoplasmic domain, (semaphorin) 5A	8.20364	8.09237	7.83189	8.14392	5.01486	5.66867	5.6918	5.79852	1.36095e-05	6.66112e-05	2.52449
8017850	NM_017983	WIPI1	WD repeat domain, phosphoinositide interacting 1	10.6603	10.5493	10.6649	10.4774	8.02241	8.13935	8.00925	8.09184	7.04613e-09	7.17617e-07	2.52226
8004510	NM_001251	CD68	CD68 molecule	11.2035	11.243	11.1229	11.2071	8.85647	8.65054	8.63432	8.56534	2.51133e-08	1.3586e-06	2.51746
8157216	NM_003358	UGCG	UDP-glucose ceramide glucosyltransferase	11.39	11.6982	11.4435	11.7234	8.69252	9.09778	8.91773	9.49068	1.12668e-05	5.81013e-05	2.51409
8059580	NM_139072	DNER	delta/notch-like EGF repeat containing	8.29142	8.27196	8.36571	8.42225	5.75485	5.72612	5.75087	6.07369	1.36831e-07	3.7732e-06	2.51145
8035304	NM_004335	BST2	bone marrow stromal cell antigen 2	7.8215	7.74474	7.50904	7.6877	5.1016	5.38047	4.99631	5.26172	4.17878e-07	7.04282e-06	2.50572
8030007	NM_001425	EMP3	epithelial membrane protein 3	11.3862	11.3278	11.4054	11.2868	8.85925	8.73984	8.84545	8.97157	7.33976e-09	7.37421e-07	2.4975
8033667	NM_144693	ZNF558	zinc finger protein 558	6.22761	7.13504	6.45707	7.0364	3.98781	4.41653	4.03899	4.42443	5.84947e-05	0.000189302	2.49709
8067007	NM_021109	TMSB4X	thymosin beta 4, X-linked	11.3511	11.4169	11.3564	11.5913	8.9312	9.08182	8.67729	9.09934	5.71051e-07	8.72161e-06	2.4815
8044301	NM_023016	SOWAHC	sosondowah ankyrin repeat domain family member C	9.46992	9.26062	9.68406	9.32818	6.91873	7.18024	7.06039	6.67035	2.47598e-06	2.1203e-05	2.47826
8116780	NM_004415	DSP	desmoplakin	10.7574	10.8873	10.7738	10.8343	8.18336	8.14489	8.57596	8.43586	4.30088e-07	7.17397e-06	2.47818
7956878	NM_007199	IRAK3	interleukin-1 receptor-associated kinase 3	6.4133	7.20422	6.49802	7.52708	4.53617	4.54971	4.53617	4.11906	0.000144936	0.000371607	2.47538
8154836	NR_003573	ANXA2P2	annexin A2 pseudogene 2	13.0881	13.0116	13.1219	12.9724	10.5291	10.7446	10.5153	10.5126	2.43301e-08	1.33149e-06	2.4731
8140971	NM_152703	SAMD9L	sterile alpha motif domain containing 9-like	6.59922	7.50214	6.78662	7.50346	4.65392	4.75202	4.57789	4.53138	5.13566e-05	0.000171593	2.46906
8136987	NM_005435	ARHGEF5	Rho guanine nucleotide exchange factor (GEF) 5	8.27406	8.51619	8.45961	8.43835	5.99974	6.00965	5.98484	5.82832	2.75574e-08	1.45779e-06	2.46642
8082075	NM_138287	DTX3L	deltex 3-like (Drosophila)	7.45124	7.89336	7.63781	8.0781	5.06092	5.02471	5.37283	5.76377	3.07958e-05	0.000117911	2.45957
7974461	NR_003225	LGALS3	lectin, galactoside-binding, soluble, 3	8.51084	8.88731	8.85998	8.65546	5.92397	6.18729	6.30629	6.67595	9.57926e-06	5.2143e-05	2.45502
7957665	NM_005230	ELK3	ELK3, ETS-domain protein (SRF accessory protein 2)	9.79158	10.0089	9.76798	9.9177	7.26886	7.4029	7.39913	7.59528	1.37765e-07	3.79089e-06	2.455
8007100	NM_001552	IGFBP4	insulin-like growth factor binding protein 4	10.6423	10.8811	10.6119	10.7518	8.33973	8.4228	8.16501	8.16301	1.53569e-07	4.04427e-06	2.44914
8145365	NM_024940	DOCK5	dedicator of cytokinesis 5	9.67542	9.81415	9.67928	9.76031	7.31413	7.12367	7.28045	7.41862	3.54665e-08	1.69618e-06	2.44807
8103399	NM_016205	PDGFC	platelet derived growth factor C	8.96501	9.10908	9.24471	9.23542	6.64661	6.6796	6.6409	6.80298	5.84508e-08	2.22063e-06	2.44603
8051573	NM_006449	CDC42EP3	CDC42 effector protein (Rho GTPase binding) 3	9.96135	10.3066	10.0286	10.2628	7.50212	7.68436	7.72606	7.8718	6.82124e-07	9.72574e-06	2.44375
8044212	NM_001056	SULT1C2	sulfotransferase family, cytosolic, 1C, member 2	7.37067	7.84947	7.28763	7.96012	5.22729	5.32232	5.02884	5.11951	1.00159e-05	5.3619e-05	2.44248
8037374	NM_002659	PLAUR	plasminogen activator, urokinase receptor	10.4079	10.3567	10.4261	10.3197	8.04985	7.58644	8.09075	8.03339	9.70098e-07	1.19575e-05	2.43747
7963786	NM_002205	ITGA5	integrin, alpha 5 (fibronectin receptor, alpha polypeptide)	10.3877	10.3597	10.3009	10.2835	7.88631	7.76415	7.91051	8.02261	1.26478e-08	9.1068e-07	2.43706
8033744	X89668	OR7E19P	olfactory receptor, family 7, subfamily E, member 19 pseudogene	7.69505	7.95504	8.13391	7.79866	5.35551	5.7397	5.16319	5.58786	4.91478e-06	3.31042e-05	2.4341
7916112	NM_002867	RAB3B	RAB3B, member RAS oncogene family	9.20314	9.26736	9.17489	9.24467	6.80442	6.68364	6.85197	6.81998	1.84004e-09	4.69396e-07	2.43252
8060997	NM_018327	SPTLC3	serine palmitoyltransferase, long chain base subunit 3	7.10422	7.83069	7.20932	8.01104	4.94386	5.45732	4.91853	5.16474	8.20966e-05	0.00024404	2.4177
8131631	NM_178423	HDAC9	histone deacetylase 9	7.92771	8.35995	8.09945	8.09294	5.75617	5.79814	5.69033	5.59571	3.27577e-07	6.28044e-06	2.40993
7904168	NM_003176	SYCP1	synaptonemal complex protein 1	6.41751	6.80737	5.99972	6.88984	3.94262	4.17698	4.14297	4.21318	2.85093e-05	0.000111495	2.40968
8143221	NM_020632	ATP6V0A4	ATPase, H+ transporting, lysosomal V0 subunit a4	8.0705	8.34057	8.08168	8.30456	5.65544	5.88609	5.5695	6.04823	1.62131e-06	1.65588e-05	2.40951
8005225	NR_003190	USP32P1	ubiquitin specific peptidase 32 pseudogene 1	8.92949	9.16762	8.74285	9.36361	6.19202	5.94818	7.12423	7.30607	0.000563046	0.00108463	2.40826
8166072	NM_021109	TMSB4X	thymosin beta 4, X-linked	11.4528	11.4803	11.4803	11.5967	9.11076	9.22399	8.8535	9.20612	1.96916e-07	4.73444e-06	2.40393
7912145	NM_001561	TNFRSF9	tumor necrosis factor receptor superfamily, member 9	10.0885	10.3597	10.0737	10.3233	8.02887	7.80104	7.70771	7.70799	5.1449e-07	8.06852e-06	2.39991
8067305	NM_014258	SYCP2	synaptonemal complex protein 2	7.12953	7.47627	7.04528	7.69399	4.72031	4.99374	4.96009	5.07835	7.84663e-06	4.53038e-05	2.39815
7929047	NM_001547	IFIT2	interferon-induced protein with tetratricopeptide repeats 2	6.38614	7.3513	6.80958	7.07248	4.5753	4.41779	4.26379	4.77708	4.9074e-05	0.000165984	2.39638
7982102	NM_000810	GABRA5	gamma-aminobutyric acid (GABA) A receptor, alpha 5	7.71324	7.91598	7.87583	8.02648	5.31204	5.40456	5.66261	5.57406	4.06198e-07	6.97291e-06	2.39457
8019988	NM_001105244	PTPRM	protein tyrosine phosphatase, receptor type, M	10.4075	10.5759	10.4969	10.5094	8.12801	8.01337	8.15192	8.12233	3.54918e-09	5.74991e-07	2.39354
7952768	NM_014758	SNX19	sorting nexin 19	7.66159	7.80543	7.84377	7.72278	5.28293	5.77194	5.2591	5.1465	3.1212e-06	2.45166e-05	2.39328
7904158	NM_020190	OLFML3	olfactomedin-like 3	8.166	8.16771	8.04319	8.3072	5.41974	5.75606	6.11982	5.8377	4.52897e-06	3.1609e-05	2.3877
7908940	NM_001001396	ATP2B4	ATPase, Ca++ transporting, plasma membrane 4	9.85791	9.95163	9.88152	9.76206	7.51133	7.31954	7.47895	7.61156	5.12188e-08	2.07445e-06	2.38293
8035795	NM_145297	ZNF626	zinc finger protein 626	8.17961	8.88932	8.34883	8.77908	6.31773	6.09521	6.04195	6.21067	1.16438e-05	5.93835e-05	2.38282
8171229	NM_004650	PNPLA4	patatin-like phospholipase domain containing 4	8.48002	8.27251	8.35959	8.48429	5.99224	6.09086	5.93931	6.05514	1.93043e-08	1.16766e-06	2.37971
8101774	NM_183049	TMSB4XP8	thymosin beta 4, X-linked pseudogene 8	11.7378	11.7179	11.701	11.7985	9.38025	9.53467	9.11206	9.44001	2.41085e-07	5.23382e-06	2.37206
8020220	NM_032525	TUBB6	tubulin, beta 6 class V	12.1257	11.9452	11.966	11.9182	9.68068	9.56688	9.68304	9.5404	1.72455e-08	1.10649e-06	2.37103
8114797	NM_030964	SPRY4	sprouty homolog 4 (Drosophila)	8.11398	8.20295	8.07239	8.29453	5.61339	5.84448	5.77826	5.97518	1.98767e-07	4.74895e-06	2.36813
8145736	NM_013958	NRG1	neuregulin 1	7.57288	7.89285	7.6757	8.05046	5.45221	5.38784	5.41028	5.48403	6.44219e-07	9.36034e-06	2.36438
8147469	NM_016134	CPQ	carboxypeptidase Q	7.99291	8.3586	7.84266	8.3587	5.68119	5.66991	5.6659	6.082	7.57056e-06	4.43775e-05	2.36347
8151334	NM_005098	MSC	musculin	8.17074	8.38773	8.06286	8.18311	5.65844	5.94144	5.91882	5.83631	2.51425e-07	5.39547e-06	2.36236
8031884	NM_014480	ZNF544	zinc finger protein 544	7.43309	7.63484	7.3581	7.86066	5.41079	5.19431	5.16377	5.09152	1.98151e-06	1.85777e-05	2.35657
7953532	NM_001975	ENO2	enolase 2 (gamma, neuronal)	11.1922	10.9115	11.1321	10.8218	8.82084	8.42703	8.69618	8.69264	1.19126e-06	1.38408e-05	2.35521
8117339	NM_003531	HIST1H3C	histone cluster 1, H3c	7.9381	7.61846	7.81376	7.47993	5.41776	5.3869	5.42634	5.2099	8.28864e-07	1.09358e-05	2.35234
8122265	NM_006290	TNFAIP3	tumor necrosis factor, alpha-induced protein 3	10.0844	10.157	10.2405	10.1557	7.89193	7.70874	7.71444	7.94401	4.11659e-08	1.78439e-06	2.3446
8147516	NM_002380	MATN2	matrilin 2	8.33772	8.34918	8.28683	8.51516	6.12846	5.97562	5.71597	6.31594	2.49419e-06	2.12554e-05	2.33822
8115210	NM_006058	TNIP1	TNFAIP3 interacting protein 1	9.44422	9.68053	9.58683	9.59432	7.28779	7.03983	7.5786	7.07439	2.23642e-06	1.98426e-05	2.33132
7949503	NM_016938	EFEMP2	EGF containing fibulin-like extracellular matrix protein 2	8.64143	8.78353	8.66258	8.64901	6.43197	6.29986	6.31603	6.3638	3.32207e-09	5.62314e-07	2.33122
7961440	NM_024829	PLBD1	phospholipase B domain containing 1	7.13547	7.39036	7.1436	7.47929	4.85956	5.04896	5.00339	4.92722	3.3738e-07	6.30934e-06	2.3274
8149324	NM_053279	FAM167A	family with sequence similarity 167, member A	8.00837	7.99973	8.00229	8.23372	5.92757	5.60057	5.76003	5.6525	2.58384e-07	5.48763e-06	2.32586
8177788	NM_005516	HLA-E	major histocompatibility complex, class I, E	11.2388	11.2489	11.1965	11.2459	9.03873	8.82511	9.0067	8.76784	4.10939e-08	1.78439e-06	2.32292
8179103	NM_005516	HLA-E	major histocompatibility complex, class I, E	11.2388	11.2489	11.1965	11.2459	9.03873	8.82511	9.0067	8.76784	4.10939e-08	1.78439e-06	2.32292
8143610	NM_005435	ARHGEF5	Rho guanine nucleotide exchange factor (GEF) 5	7.84232	8.19153	7.95878	8.10933	5.77928	5.78529	5.75009	5.52562	4.11607e-07	7.00363e-06	2.31542
7903461	NM_001113226	NTNG1	netrin G1	8.33765	8.63246	8.2452	8.68314	5.86605	6.42388	6.28164	6.08072	7.54573e-06	4.42519e-05	2.31154
8148184	NM_032899	FAM83A	family with sequence similarity 83, member A	9.10652	8.94737	9.02577	8.81692	6.72792	6.77221	6.62445	6.53833	1.23739e-07	3.57177e-06	2.30842
8022176	NM_005559	LAMA1	laminin, alpha 1	8.98344	9.22551	9.10173	9.28807	6.66927	6.88453	6.9153	6.9016	2.19788e-07	4.99749e-06	2.30701
7917503	NM_018284	GBP3	guanylate binding protein 3	6.26115	6.81606	6.50803	6.87676	4.13454	4.61342	4.27169	4.25268	1.25784e-05	6.30406e-05	2.29742
7919095	NM_024408	NOTCH2	notch 2	10.9852	11.2555	11.0291	11.2036	8.69861	8.61821	9.07128	8.92988	1.56758e-06	1.63317e-05	2.28886
7966026	NM_014840	NUAK1	NUAK family, SNF1-like kinase, 1	8.45371	8.83266	8.53346	8.66748	6.2773	6.37426	6.54191	6.14317	1.21941e-06	1.3986e-05	2.28767
8021301	NM_004163	RAB27B	RAB27B, member RAS oncogene family	7.49553	7.93039	7.35765	7.77302	5.40326	5.35777	5.27992	5.38883	2.49141e-06	2.12554e-05	2.28171
8027254	NM_007138	ZNF90	zinc finger protein 90	6.99091	7.38813	7.01714	7.47552	4.74541	4.78121	5.08424	5.13622	7.61203e-06	4.45802e-05	2.28116
8096050	NM_004464	FGF5	fibroblast growth factor 5	8.63011	8.69222	8.66221	8.90983	6.25147	6.49218	6.45306	6.59529	3.68845e-07	6.63949e-06	2.27559
7957386	NM_024560	ACSS3	acyl-CoA synthetase short-chain family member 3	7.42188	7.8228	7.4807	7.7261	5.36608	5.64506	5.20386	5.1357	4.895e-06	3.30254e-05	2.2752
7914127	NM_002038	IFI6	interferon, alpha-inducible protein 6	9.81007	10.3641	9.91426	10.3643	7.64193	7.76365	7.88657	8.06304	1.15035e-05	5.89528e-05	2.27439
8112592	NM_004472	FOXD1	forkhead box D1	10.0004	9.89099	9.82982	9.79266	7.76923	7.3802	7.6433	7.63605	3.17675e-07	6.19345e-06	2.27126
8109001	NM_001127698	SPINK5	serine peptidase inhibitor, Kazal type 5	7.61366	7.56965	7.73034	7.58576	5.33362	5.10291	5.3639	5.62688	1.00463e-06	1.22835e-05	2.26803
8117890	NM_005516	HLA-E	major histocompatibility complex, class I, E	11.2209	11.2442	11.1714	11.2171	9.08386	8.84545	9.0738	8.78674	1.12876e-07	3.38642e-06	2.26595
7956120	NM_001982	ERBB3	v-erb-b2 erythroblastic leukemia viral oncogene homolog 3 (avian)	7.84426	7.72695	7.77328	7.75849	5.6546	5.64789	5.56736	5.17564	1.1906e-06	1.38408e-05	2.26437
8095744	NM_001657	AREG	amphiregulin	8.46886	8.72473	8.83014	8.82344	5.83803	6.51327	6.22103	7.22976	0.000315911	0.00068622	2.26127
8131339	NM_003088	FSCN1	fascin homolog 1, actin-bundling protein (Strongylocentrotus purpuratus)	10.59	10.685	10.6817	10.5174	8.45374	8.24942	8.43704	8.29594	3.73172e-08	1.7232e-06	2.2595
8115831	NM_004417	DUSP1	dual specificity phosphatase 1	11.9201	11.7569	11.9	11.7721	9.58842	9.50137	9.68108	9.54966	1.72035e-08	1.10649e-06	2.25714
8138988	NR_002833	DPY19L2P1	dpy-19-like 2 pseudogene 1 (C. elegans)	7.2322	7.51836	7.2817	8.01092	5.2555	5.12687	5.94828	4.69606	0.000374846	0.000786499	2.25412
8103240	NR_001562	ANXA2P1	annexin A2 pseudogene 1	8.76409	8.85917	8.84432	9.17262	6.54568	6.65984	6.79595	6.6652	6.2971e-07	9.26235e-06	2.24338
8075728	NM_002473	MYH9	myosin, heavy chain 9, non-muscle	10.3495	10.3334	10.3848	10.3089	8.11918	7.72849	8.19123	8.36731	3.13871e-06	2.46341e-05	2.24261
8039044	NR_028343	ZNF415	zinc finger protein 415	6.54322	6.97093	6.51644	7.2302	4.59988	4.55399	4.65222	4.49709	1.45809e-05	6.97807e-05	2.2394
8068022	NR_030784	MIR155	microRNA 155	6.81931	6.60882	6.79289	6.60748	4.5241	4.73162	4.01794	4.59992	1.04352e-05	5.52927e-05	2.23874
7995838	NM_005952	MT1X	metallothionein 1X	11.9387	11.8812	11.9098	11.9255	9.96497	9.70747	9.46793	9.5651	8.577e-07	1.11356e-05	2.23745
7938834	NM_182964	NAV2	neuron navigator 2	8.11197	8.41463	8.11017	8.44806	6.17273	5.94303	5.96354	6.0577	7.5999e-07	1.02925e-05	2.23696
8066619	NM_006227	PLTP	phospholipid transfer protein	9.88205	9.84949	9.80681	9.71388	7.58395	7.43261	7.73506	7.60593	7.59901e-08	2.65464e-06	2.22367
7995825	NM_005949	MT1F	metallothionein 1F	11.3709	11.7156	11.2813	11.7065	9.52789	9.35586	8.88846	9.4122	1.72683e-05	7.837e-05	2.22247
8117106	NM_182757	RNF144B	ring finger protein 144B	8.135	8.50815	8.21674	8.30035	5.83048	6.09637	6.04733	6.29621	2.01202e-06	1.87603e-05	2.22246
7918223	NM_144584	HENMT1	HEN1 methyltransferase homolog 1 (Arabidopsis)	6.90891	7.00693	7.33311	7.28299	5.03562	5.13407	4.83553	4.67004	5.28506e-06	3.48232e-05	2.21417
8039054	NM_001172674	ZNF347	zinc finger protein 347	6.61052	6.97812	7.06494	7.36487	4.4652	4.98455	4.65641	5.05636	4.10691e-05	0.00014559	2.21398
8146934	NM_015364	LY96	lymphocyte antigen 96	6.05667	6.69302	6.26907	6.84267	4.23308	4.12469	4.31753	4.33175	2.31061e-05	9.59217e-05	2.21359
7903281	NM_012243	SLC35A3	solute carrier family 35 (UDP-N-acetylglucosamine (UDP-GlcNAc) transporter), member A3	10.6223	10.5399	10.6079	10.533	8.20229	8.06929	8.68943	8.56263	5.95681e-06	3.76602e-05	2.19488
7906085	NM_170707	LMNA	lamin A/C	9.91515	9.76429	9.77873	9.84399	7.5521	7.75164	7.78286	7.43877	2.93442e-07	5.90547e-06	2.1942
8023995	NM_005860	FSTL3	follistatin-like 3 (secreted glycoprotein)	10.1022	9.96388	9.98102	9.75815	7.99618	7.8066	7.62451	7.61229	1.36407e-06	1.49696e-05	2.19141
8154245	NM_025239	PDCD1LG2	programmed cell death 1 ligand 2	7.30866	7.71352	7.57086	7.7784	5.26467	5.46621	5.75425	5.13062	1.39639e-05	6.7656e-05	2.18893
8117045	NM_001143942	RBM24	RNA binding motif protein 24	8.05629	7.95733	7.8995	7.96115	5.68673	5.82966	5.76922	5.83692	7.08728e-09	7.17617e-07	2.18794
7938485	NM_014632	MICAL2	microtubule associated monoxygenase, calponin and LIM domain containing 2	8.4259	8.73196	8.48076	8.695	6.31979	6.36709	6.49593	6.40653	2.27013e-07	5.03803e-06	2.18607
7929052	NM_001031683	IFIT3	interferon-induced protein with tetratricopeptide repeats 3	7.24807	7.66247	7.0937	7.42749	5.28562	5.29271	5.19879	4.92817	6.41645e-06	3.96381e-05	2.18161
8112803	NM_005779	LHFPL2	lipoma HMGIC fusion partner-like 2	10.1301	10.2444	10.1515	10.2201	7.54462	8.20929	8.22395	8.04315	1.01165e-05	5.40236e-05	2.18128
7996571	NM_024519	FAM65A	family with sequence similarity 65, member A	9.12544	9.4431	9.11384	9.45417	7.07585	7.1261	7.15307	7.06864	5.15467e-07	8.06852e-06	2.17823
8177732	NM_002116	HLA-A	major histocompatibility complex, class I, A	13.2136	13.1736	13.1354	13.1183	11.0105	10.9097	11.0833	10.9278	5.43969e-09	6.50995e-07	2.17741
8027247	NM_031218	ZNF93	zinc finger protein 93	7.16111	7.24554	7.08751	7.59546	5.64004	4.49118	5.11753	5.13501	0.000160395	0.000402364	2.17646
8044919	NM_002881	RALB	v-ral simian leukemia viral oncogene homolog B (ras related; GTP binding protein)	10.3339	10.274	10.3049	10.2179	8.10538	8.18593	8.05367	8.10433	1.6287e-09	4.62255e-07	2.17036
8088979	NM_016206	VGLL3	vestigial like 3 (Drosophila)	9.28221	9.4034	9.38818	9.32048	7.00797	7.17137	7.24751	7.32898	1.08024e-07	3.31765e-06	2.15961
7927367	NM_001040084	ANXA8	annexin A8	8.48739	8.52534	8.53821	8.48266	6.35908	6.32393	6.48711	6.25078	1.22312e-08	9.05846e-07	2.15318
8064014	NM_022082	SLC17A9	solute carrier family 17, member 9	8.98791	9.08151	9.01177	9.03342	6.86192	7.10067	6.89779	6.64266	5.11121e-07	8.04541e-06	2.15289
8178498	NM_005514	HLA-B	major histocompatibility complex, class I, B	13.2195	13.3529	13.2512	13.3407	11.2097	11.0786	11.1935	11.0725	9.5288e-09	8.4588e-07	2.15248
8114572	NM_001945	HBEGF	heparin-binding EGF-like growth factor	10.6305	10.7171	10.5866	10.7077	8.44797	8.4062	8.55215	8.6266	2.83207e-08	1.46821e-06	2.15223
7905220	NM_004425	ECM1	extracellular matrix protein 1	8.64903	8.75081	8.6476	8.69646	6.38066	6.75852	6.59868	6.41746	3.73226e-07	6.70551e-06	2.14714
8109843	NM_004946	DOCK2	dedicator of cytokinesis 2	6.89421	7.46917	7.36782	7.08511	4.91658	5.26962	5.21083	4.8506	1.42389e-05	6.85782e-05	2.14217
8037322	NM_014297	ETHE1	ethylmalonic encephalopathy 1	9.88182	9.82114	9.78401	9.68949	7.69257	7.68307	7.61099	7.62357	5.96549e-09	6.6525e-07	2.14157
8139207	NM_002192	INHBA	inhibin, beta A	9.91748	10.2152	9.92506	10.1754	7.97706	8.00752	7.83833	7.85031	3.75901e-07	6.72912e-06	2.13995
7937330	NM_006435	IFITM2	interferon induced transmembrane protein 2	10.0629	10.2013	10.1299	10.3753	8.3329	8.08966	7.58276	8.20697	1.99018e-05	8.67798e-05	2.13927
8062312	NM_006097	MYL9	myosin, light chain 9, regulatory	9.81893	9.95866	9.91814	9.73956	7.73312	7.91532	8.0105	7.23576	2.13362e-05	9.08737e-05	2.13514
8021623	NM_003784	SERPINB7	serpin peptidase inhibitor, clade B (ovalbumin), member 7	6.73906	6.25782	6.64858	6.60911	4.7369	4.41338	4.22436	4.34426	8.1863e-06	4.66369e-05	2.13392
7982366	NM_001144757	SCG5	secretogranin V (7B2 protein)	7.05794	7.11936	7.08485	7.99776	5.08499	5.03417	5.01834	5.58844	0.00019904	0.000477301	2.13349
8123936	NM_001142393	NEDD9	neural precursor cell expressed, developmentally down-regulated 9	7.47498	7.2497	7.54721	7.39116	5.53116	5.29618	5.06353	5.24413	1.63938e-06	1.66648e-05	2.13201
7925876	NM_002627	PFKP	phosphofructokinase, platelet	10.6439	10.713	10.612	10.7387	8.63253	8.37736	8.66052	8.51645	9.02389e-08	2.99883e-06	2.13019
7920278	NM_002960	S100A3	S100 calcium binding protein A3	7.92415	8.16186	8.15258	7.68397	5.59929	6.14473	6.05501	5.60703	2.47269e-05	0.00010062	2.12913
8073474	NM_152513	MEI1	meiosis inhibitor 1	7.635	7.8585	7.39564	7.84368	5.70637	5.43673	5.36393	5.71817	5.54798e-06	3.58807e-05	2.1269
7989094	NM_006154	NEDD4	neural precursor cell expressed, developmentally down-regulated 4, E3 ubiquitin protein ligase	10.0652	10.2318	10.0714	10.3407	7.8932	8.19519	7.97394	8.1407	5.92148e-07	8.93185e-06	2.12654
8054862	NR_000034	NA	NA	10.5503	10.6964	10.5987	10.6521	8.52902	8.31723	8.64451	8.50984	1.27258e-07	3.62491e-06	2.12423
8180308	NM_145905	HMGA1	high mobility group AT-hook 1	11.6277	11.8673	11.5711	11.8634	9.61202	9.51411	9.66953	9.67943	3.06799e-07	6.0614e-06	2.11362
8124423	NM_003518	HIST1H2BG	histone cluster 1, H2bg	9.06205	9.05306	9.26724	9.05215	6.89696	7.1956	6.96806	6.92308	3.05253e-07	6.0493e-06	2.1127
8108697	NM_015669	PCDHB5	protocadherin beta 5	6.76272	7.26227	6.88885	7.24549	4.9531	5.07275	4.84017	4.85039	4.81677e-06	3.28395e-05	2.11073
8022145	NM_173464	L3MBTL4	l(3)mbt-like 4 (Drosophila)	7.46309	7.70685	7.48341	7.5471	5.62137	5.55869	5.2505	5.33624	9.45574e-07	1.17725e-05	2.10841
8138602	NM_004403	DFNA5	deafness, autosomal dominant 5	8.85632	9.00815	8.82687	8.98553	6.90691	6.67962	6.69529	6.96357	2.94948e-07	5.91747e-06	2.10787
8142886	NM_003344	UBE2H	ubiquitin-conjugating enzyme E2H	9.72943	9.9024	9.80927	9.76042	7.72027	7.45235	7.64655	7.97255	1.63941e-06	1.66648e-05	2.10245
8124911	NM_005514	HLA-B	major histocompatibility complex, class I, B	13.1927	13.2935	13.2052	13.3381	11.2407	11.0933	11.2056	11.0805	1.75866e-08	1.11538e-06	2.10235
7953603	NM_201442	C1S	complement component 1, s subcomponent	8.27075	8.30342	8.32528	8.28287	6.15679	6.29601	6.18566	6.15007	1.68654e-09	4.65074e-07	2.09845
7946781	NM_175058	PLEKHA7	pleckstrin homology domain containing, family A member 7	8.24049	8.35102	8.31931	8.39492	5.93257	6.4086	6.15571	6.41518	2.24675e-06	1.98765e-05	2.09842
7940028	NM_000062	SERPING1	serpin peptidase inhibitor, clade G (C1 inhibitor), member 1	7.90695	8.07408	7.80727	8.28951	5.82346	6.10578	5.88994	5.86948	2.5744e-06	2.1666e-05	2.09729
8030931	NM_032423	ZNF528	zinc finger protein 528	7.29487	8.02894	7.56444	8.03335	5.62951	5.8857	5.25784	5.78084	9.4714e-05	0.000271287	2.09193
7913357	NM_001397	ECE1	endothelin converting enzyme 1	10.2564	10.627	10.3063	10.6792	8.3479	8.2249	8.46708	8.46436	2.6046e-06	2.18351e-05	2.09113
8148049	NM_002514	NOV	nephroblastoma overexpressed	9.11619	9.53174	9.09713	9.46388	7.29236	7.00933	7.33213	7.22207	4.54485e-06	3.16347e-05	2.08826
8035779	NM_021047	ZNF253	zinc finger protein 253	10.0917	10.314	10.1308	10.3448	8.21902	7.63555	8.2555	8.42506	2.77103e-05	0.000109294	2.08655
8180307	NM_145903	HMGA1	high mobility group AT-hook 1	11.5098	11.7448	11.4532	11.7515	9.52845	9.44168	9.56696	9.59206	2.93894e-07	5.90547e-06	2.08255
7986214	NM_013272	SLCO3A1	solute carrier organic anion transporter family, member 3A1	8.30013	8.25909	8.27048	8.28811	6.23278	6.41422	5.96648	6.18266	5.07285e-07	8.00815e-06	2.08042
8093462	NM_001017405	MAEA	macrophage erythroblast attacher	10.4959	10.3598	10.474	10.3806	8.37211	8.11143	8.38253	8.53166	5.45097e-07	8.41042e-06	2.07815
8041179	NM_024692	CLIP4	CAP-GLY domain containing linker protein family, member 4	9.20377	9.33098	9.2502	9.32225	7.19921	7.09592	7.30479	7.19629	1.70647e-08	1.10649e-06	2.07774
7953321	NM_002342	LTBR	lymphotoxin beta receptor (TNFR superfamily, member 3)	8.72129	8.81482	8.81214	8.71774	6.68702	6.91469	6.78256	6.38777	1.8903e-06	1.8078e-05	2.07349
7973352	NM_014045	LRP10	low density lipoprotein receptor-related protein 10	9.02653	9.33835	9.03744	9.18489	7.03597	6.89167	7.16698	7.20103	9.04941e-07	1.14536e-05	2.07289
7930074	NM_002502	NFKB2	nuclear factor of kappa light polypeptide gene enhancer in B-cells 2 (p49/p100)	9.82668	9.96372	9.75964	10.0468	7.81794	7.86432	7.71487	7.94072	2.28648e-07	5.06212e-06	2.06475
7988467	NM_000138	FBN1	fibrillin 1	7.89028	8.10184	7.96986	8.04502	5.99461	5.90369	6.05546	5.81044	1.06798e-07	3.31638e-06	2.0607
8138527	NM_207342	STEAP1B	STEAP family member 1B	9.88234	10.0445	9.86878	10.3019	7.86084	8.12185	7.84454	8.0317	2.65335e-06	2.21721e-05	2.05965
8080144	NM_001003931	PARP3	poly (ADP-ribose) polymerase family, member 3	9.71613	9.9252	9.67258	9.76493	7.68427	7.63019	7.65127	7.89977	2.88753e-07	5.87503e-06	2.05334
8025828	NM_000527	LDLR	low density lipoprotein receptor	11.5272	11.603	11.4891	11.544	9.51508	9.38011	9.59372	9.46144	1.5357e-08	1.03277e-06	2.05325
8089701	NM_015642	ZBTB20	zinc finger and BTB domain containing 20	7.33782	8.03097	7.52006	8.0288	5.65478	5.46257	5.56991	6.01853	7.44141e-05	0.000226534	2.05296
8044440	NM_153214	FBLN7	fibulin 7	8.68006	8.6083	8.46528	8.62753	6.41677	6.67678	6.54331	6.53304	1.06476e-07	3.31638e-06	2.05282
7926368	NM_003380	VIM	vimentin	12.9264	12.9224	12.8726	12.8936	10.8719	10.7936	10.961	10.7789	6.2887e-09	6.75691e-07	2.05237
7964872	NM_001109754	PTPRB	protein tyrosine phosphatase, receptor type, B	6.90175	7.19579	7.03961	7.25433	5.22797	5.21299	4.9064	4.83838	3.91418e-06	2.85802e-05	2.05144
7974425	NM_015589	SAMD4A	sterile alpha motif domain containing 4A	9.08194	9.15547	9.19085	9.01493	7.0973	7.04951	7.13741	6.95944	2.4348e-08	1.33149e-06	2.04988
8016646	NM_000088	COL1A1	collagen, type I, alpha 1	9.53024	9.56689	9.36259	9.50538	7.57895	7.39189	7.4926	7.31832	1.31054e-07	3.66853e-06	2.04583
8138067	NM_004227	CYTH3	cytohesin 3	9.73173	10.022	9.75879	9.95631	7.74848	7.68267	7.79551	8.05897	1.5114e-06	1.59646e-05	2.0458
7927998	NM_025130	HKDC1	hexokinase domain containing 1	7.54963	7.39244	7.85184	7.31897	5.40959	5.47356	5.58191	5.47491	3.09411e-06	2.43777e-05	2.04323
8170998	NM_012151	F8A1	coagulation factor VIII-associated 1	10.4445	10.8029	10.4643	10.7765	8.6123	8.42136	8.69278	8.59431	1.80895e-06	1.76586e-05	2.04184
8032909	NM_005817	PLIN3	perilipin 3	9.77461	9.49033	9.68498	9.49647	7.47154	7.76263	7.60132	7.44764	9.60445e-07	1.19005e-05	2.04081
7927307	NM_001630	ANXA8L2	annexin A8-like 2	8.44381	8.35463	8.48981	8.40215	6.36439	6.34203	6.52189	6.29918	3.01202e-08	1.5249e-06	2.04073
8171029	NM_012151	F8A1	coagulation factor VIII-associated 1	10.4391	10.8073	10.4504	10.7704	8.61669	8.41665	8.69112	8.58778	2.10318e-06	1.92639e-05	2.03873
7978644	NM_020529	NFKBIA	nuclear factor of kappa light polypeptide gene enhancer in B-cells inhibitor, alpha	12.0042	12.0946	12.0851	12.0566	9.92899	10.14	9.96487	10.0619	1.83946e-08	1.15171e-06	2.03618
8127051	NM_012288	TRAM2	translocation associated membrane protein 2	10.3373	10.6847	10.3679	10.5812	8.57761	8.17268	8.56518	8.51538	3.83045e-06	2.8125e-05	2.03506
7909789	NM_001135599	TGFB2	transforming growth factor, beta 2	8.33213	8.71535	8.29465	8.74318	6.39503	6.64092	6.24175	6.66795	1.34086e-05	6.59267e-05	2.03492
8114805	NM_000800	FGF1	fibroblast growth factor 1 (acidic)	7.2762	7.50199	7.32867	7.56092	5.66876	5.44183	5.18603	5.23967	4.15949e-06	2.97348e-05	2.03288
8081590	NM_001134439	PHLDB2	pleckstrin homology-like domain, family B, member 2	8.01749	8.23242	8.1018	8.2873	6.18885	6.16759	6.09278	6.06217	9.57175e-08	3.10397e-06	2.03191
8036430	NM_152605	ZNF781	zinc finger protein 781	6.26675	6.8192	6.63875	6.89392	4.63876	4.77276	4.82542	4.25685	3.94167e-05	0.000140927	2.03121
8041853	NM_002354	EPCAM	epithelial cell adhesion molecule	7.7414	8.01995	7.82722	7.90444	5.62272	5.93811	5.74941	6.05808	1.957e-06	1.8499e-05	2.03117
7977854	NM_032876	AJUBA	ajuba LIM protein	8.83282	9.09193	8.92529	9.15158	6.74773	7.1867	7.03646	6.91216	2.56084e-06	2.1608e-05	2.02964
8015210	NM_033184	KRTAP2-4	keratin associated protein 2-4	9.79372	9.71106	9.63927	9.47933	7.76456	7.72845	7.61375	7.39843	1.32141e-06	1.46503e-05	2.02955
8019576	NM_033184	KRTAP2-4	keratin associated protein 2-4	9.79372	9.71106	9.63927	9.47933	7.76456	7.72845	7.61375	7.39843	1.32141e-06	1.46503e-05	2.02955
7948997	NM_015459	ATL3	atlastin GTPase 3	10.085	10.2126	10.1348	10.2197	8.17624	8.13327	8.02986	8.197	1.37489e-08	9.71252e-07	2.02894
7972810	NM_024537	CARS2	cysteinyl-tRNA synthetase 2, mitochondrial (putative)	9.99589	9.84911	9.9617	9.7558	7.76616	7.7722	7.80437	8.10641	8.51257e-07	1.11217e-05	2.02834
8117800	NM_002116	HLA-A	major histocompatibility complex, class I, A	13.0786	13.0343	13.0601	12.9722	11.0935	10.9233	11.0853	10.9329	1.92066e-08	1.16766e-06	2.02757
7901175	NM_005727	TSPAN1	tetraspanin 1	7.363	7.74055	7.51535	7.45946	5.51422	5.60762	5.45187	5.39475	5.76286e-07	8.73565e-06	2.02747
8044417	NM_032824	TMEM87B	transmembrane protein 87B	9.1357	9.24409	9.1104	9.28228	6.99696	7.0109	7.19963	7.47176	2.55393e-06	2.15778e-05	2.0233
7970162	NM_015205	ATP11A	ATPase, class VI, type 11A	8.3868	8.5764	8.23647	8.45316	6.32828	6.06971	6.58855	6.58316	7.6457e-06	4.46956e-05	2.02078
8145470	NM_001386	DPYSL2	dihydropyrimidinase-like 2	9.59946	9.73087	9.69868	9.61959	7.70339	7.46553	7.66212	7.7358	9.85855e-08	3.13936e-06	2.02044
7970262	NM_001008895	CUL4A	cullin 4A	9.17202	9.37948	9.15641	9.31268	7.37009	6.8741	7.23306	7.5037	9.1286e-06	5.02545e-05	2.00991
8117422	NM_003540	HIST1H4F	histone cluster 1, H4f	8.72011	8.37685	8.76681	8.46789	6.56164	6.73275	6.61315	6.38722	2.76678e-06	2.27243e-05	2.00923
8085689	NM_014744	TBC1D5	TBC1 domain family, member 5	7.60874	7.77248	7.50818	7.87768	5.6718	5.66872	5.52097	5.87712	1.77147e-06	1.74861e-05	2.00711
8074856	NM_206953	PRAME	preferentially expressed antigen in melanoma	8.84289	8.8755	8.87352	8.86111	6.69988	6.72374	6.87963	7.12287	8.61221e-07	1.11356e-05	2.00673
8015412	NM_002230	JUP	junction plakoglobin	9.33818	9.3939	9.13482	9.20512	7.22141	7.15496	7.4405	7.23943	3.98435e-07	6.92425e-06	2.00393
8176026	NM_001456	FLNA	filamin A, alpha	11.1389	11.1458	11.0854	11.0735	9.18478	8.97861	9.17429	9.11785	1.82327e-08	1.14711e-06	1.997
8112615	NM_003633	ENC1	ectodermal-neural cortex 1 (with BTB domain)	7.99621	7.9073	8.00126	7.79556	6.04822	6.03809	5.90543	5.72404	5.39824e-07	8.35891e-06	1.99614
7995739	NM_020988	GNAO1	guanine nucleotide binding protein (G protein), alpha activating activity polypeptide O	7.84214	8.45654	7.90508	8.27751	6.37916	6.20453	5.93154	5.99027	3.2026e-05	0.000121013	1.99394
8005687	NR_026809	FAM106A	family with sequence similarity 106, member A	8.40377	8.77326	8.42361	8.67902	6.77742	6.18109	6.78285	6.56883	2.22895e-05	9.36719e-05	1.99237
8180003	NM_022555	HLA-DRB3	major histocompatibility complex, class II, DR beta 3	8.6446	8.61643	8.6697	8.6087	6.5029	6.60667	6.7848	6.70197	6.39631e-08	2.34843e-06	1.98577
8148476	NM_014957	DENND3	DENN/MADD domain containing 3	8.00179	8.12284	8.09833	7.98546	5.82899	6.28419	6.05539	6.11768	1.08947e-06	1.30259e-05	1.98054
7947138	NM_022725	FANCF	Fanconi anemia, complementation group F	6.25436	6.77365	6.35437	6.76044	4.71511	4.68048	4.52413	4.30272	2.00217e-05	8.71071e-05	1.98009
7920123	NM_002966	S100A10	S100 calcium binding protein A10	12.948	13.0294	12.9678	13.1392	11.0019	10.7002	10.9871	11.4758	2.12474e-05	9.05848e-05	1.97984
8016239	NR_027774	PLEKHM1	pleckstrin homology domain containing, family M (with RUN domain) member 1	7.49491	7.54173	7.46855	7.56341	5.48006	4.82107	6.12453	5.72724	0.000359241	0.000761306	1.97893
7988414	NM_001482	GATM	glycine amidinotransferase (L-arginine:glycine amidinotransferase)	6.97263	7.88972	7.38324	7.6802	5.42444	5.5597	5.54447	5.49691	6.43868e-05	0.000203236	1.97506
7920285	NM_005978	S100A2	S100 calcium binding protein A2	7.97345	8.05817	8.18948	7.76021	5.76779	6.49936	6.03602	5.78404	5.09086e-05	0.000170492	1.97352
8176245	NM_012151	F8A1	coagulation factor VIII-associated 1	10.6338	11.0141	10.6503	10.9614	8.86634	8.67189	8.97854	8.84904	3.03141e-06	2.41331e-05	1.97347
8170648	NM_001711	BGN	biglycan	8.89308	9.21136	8.86164	9.23482	6.82466	7.42279	7.24169	6.83108	3.51188e-05	0.000128977	1.97017
7920664	NM_007112	THBS3	thrombospondin 3	8.02523	8.25557	8.12379	8.24767	6.13902	5.92297	6.35437	6.35579	2.82157e-06	2.30458e-05	1.97003
8078330	NM_001003793	RBMS3	RNA binding motif, single stranded interacting protein 3	8.20711	8.53884	8.25653	8.45833	6.3269	6.23667	6.43381	6.59101	1.96138e-06	1.85144e-05	1.9681
8069553	NM_003489	NRIP1	nuclear receptor interacting protein 1	11.1947	11.2131	11.2691	11.2244	9.14637	9.30077	9.35506	9.23283	1.36887e-08	9.71252e-07	1.96657
7960757	NM_016546	C1RL	complement component 1, r subcomponent-like	7.72174	7.97038	7.63563	7.82446	5.89684	5.9589	5.71369	5.72093	8.34106e-07	1.09751e-05	1.96546
7917912	NM_000110	DPYD	dihydropyrimidine dehydrogenase	7.81531	8.21453	7.90429	8.35183	5.83108	6.15337	6.27753	6.17737	1.7549e-05	7.93056e-05	1.96165
8017651	NM_022739	SMURF2	SMAD specific E3 ubiquitin protein ligase 2	12.1518	12.2886	12.0905	12.3911	10.164	10.364	10.2996	10.2481	2.97627e-07	5.95279e-06	1.96154
8008185	NM_016428	ABI3	ABI family, member 3	7.84469	8.22088	8.15779	8.20259	6.19386	5.78045	6.27022	6.33663	1.38878e-05	6.74133e-05	1.9612
7922756	NM_015039	NMNAT2	nicotinamide nucleotide adenylyltransferase 2	8.45928	8.63347	8.27157	8.61507	6.42472	6.4996	6.53947	6.68615	1.18222e-06	1.38162e-05	1.95736
8025053	NM_003811	TNFSF9	tumor necrosis factor (ligand) superfamily, member 9	9.67163	9.75089	9.76893	9.6338	7.59581	8.07769	7.84331	7.4804	7.3323e-06	4.35532e-05	1.95701
8059852	NM_001166217	NA	NA	8.88886	9.07042	8.61816	9.04368	6.7266	7.03902	6.97742	7.05934	5.20965e-06	3.45194e-05	1.95469
8177725	NM_002127	HLA-G	major histocompatibility complex, class I, G	12.3595	12.4049	12.311	12.5542	10.4629	10.489	10.4972	10.3639	6.05625e-08	2.26203e-06	1.95413
8179034	NM_002127	HLA-G	major histocompatibility complex, class I, G	12.3595	12.4049	12.311	12.5542	10.4629	10.489	10.4972	10.3639	6.05625e-08	2.26203e-06	1.95413
8059177	NM_006000	TUBA4A	tubulin, alpha 4a	10.3971	10.5316	10.4294	10.2808	8.71441	8.28875	8.52155	8.30227	2.47217e-06	2.11909e-05	1.95296
8037240	NM_006905	PSG1	pregnancy specific beta-1-glycoprotein 1	6.99607	7.27564	7.29047	7.26824	4.48924	5.55741	4.92321	6.0512	0.0014382	0.00232302	1.95234
7956301	NM_002332	LRP1	low density lipoprotein receptor-related protein 1	8.67234	8.99522	8.71673	8.94106	6.91026	6.74058	7.01501	6.85938	1.07409e-06	1.29156e-05	1.95003
8033241	NM_001252	CD70	CD70 molecule	9.27963	9.31721	9.09858	9.29483	7.28898	7.53482	7.32201	7.05271	2.1687e-06	1.95623e-05	1.94793
7922610	NM_007314	ABL2	v-abl Abelson murine leukemia viral oncogene homolog 2	10.2497	10.2018	10.194	10.1915	8.25069	8.29208	8.32211	8.18301	1.61346e-09	4.62255e-07	1.94726
8124437	NM_021018	HIST1H3F	histone cluster 1, H3f	10.9225	10.3295	10.816	10.315	8.55969	8.8358	8.67772	8.54201	3.00788e-05	0.000116127	1.94196
7995976	NM_152727	CPNE2	copine II	10.367	10.458	10.2596	10.5021	8.46458	8.43669	8.44389	8.47402	3.20388e-08	1.57835e-06	1.94189
8069499	NM_001145029	ANKRD30B	ankyrin repeat domain 30B	5.61978	6.60233	5.55268	6.54742	3.91414	4.31136	4.2442	4.09564	0.0006412	0.00120649	1.93922
7999468	NM_004862	LITAF	lipopolysaccharide-induced TNF factor	11.3205	11.5327	11.3294	11.4887	9.53003	9.29357	9.46255	9.64102	6.95486e-07	9.84419e-06	1.93603
7965335	NM_001946	DUSP6	dual specificity phosphatase 6	8.2277	7.95179	8.2675	8.0429	6.36323	6.04005	6.25508	6.08986	1.71789e-06	1.71004e-05	1.93542
7928705	NM_030927	TSPAN14	tetraspanin 14	9.3451	9.30861	9.31998	9.1537	7.43324	7.28586	7.32945	7.37753	3.15057e-08	1.5705e-06	1.92533
8134552	NM_005720	ARPC1B	actin related protein 2/3 complex, subunit 1B, 41kDa	10.4782	10.1791	10.3689	10.0554	8.27092	8.61567	8.26683	8.22929	6.22495e-06	3.88182e-05	1.92472
8123637	NM_000904	NQO2	NAD(P)H dehydrogenase, quinone 2	8.25111	8.59169	8.30968	8.23647	6.76416	6.37876	6.43297	6.11484	1.80026e-05	8.07348e-05	1.92455
8010061	NM_182965	SPHK1	sphingosine kinase 1	9.14494	8.81364	8.96055	8.85841	6.93054	6.9119	7.07248	7.16611	9.53127e-07	1.18551e-05	1.92413
8130505	NM_003379	EZR	ezrin	11.6368	11.3849	11.5711	11.4537	9.63234	9.55146	9.57706	9.59047	5.64915e-08	2.18555e-06	1.92381
7935660	NM_015221	DNMBP	dynamin binding protein	8.52719	8.91361	8.52107	8.88767	6.74115	6.64576	6.84977	6.92116	4.66408e-06	3.21537e-05	1.92292
8087860	NM_007284	TWF2	twinfilin, actin-binding protein, homolog 2 (Drosophila)	10.9363	10.9809	10.9955	10.8918	9.0365	9.1805	9.06931	8.82903	2.72747e-07	5.70153e-06	1.92231
8025672	NM_020428	SLC44A2	solute carrier family 44, member 2	10.6798	10.8525	10.8088	10.8217	8.81128	8.71512	8.96945	8.97859	2.22572e-07	5.01679e-06	1.9221
8173647	NM_144969	ZDHHC15	zinc finger, DHHC-type containing 15	6.33023	6.96716	6.54075	6.81618	4.55506	4.64637	4.74013	5.02681	3.37406e-05	0.000125228	1.92149
8152491	NM_000127	EXT1	exostosin 1	10.8364	10.9234	10.8648	10.8985	8.85433	8.9831	8.96838	9.0337	7.72738e-09	7.57529e-07	1.92088
8177717	NM_018950	HLA-F	major histocompatibility complex, class I, F	9.94152	9.94441	9.81889	9.92309	8.09429	7.78627	8.36262	7.70657	1.58909e-05	7.395e-05	1.91955
7969129	NM_001040443	PHF11	PHD finger protein 11	6.92225	7.63607	7.11007	7.82932	5.43553	5.3236	5.6236	5.43738	0.000134888	0.000353105	1.9194
7943749	NM_178834	LAYN	layilin	9.13432	9.22276	9.18479	9.28542	7.29188	7.13927	7.35922	7.36673	7.3177e-08	2.59839e-06	1.91755
8043197	NM_003761	VAMP8	vesicle-associated membrane protein 8	9.69464	9.71941	9.84008	9.67302	7.80668	7.96179	7.7516	7.75829	7.39606e-08	2.61191e-06	1.91219
7907830	NM_002826	QSOX1	quiescin Q6 sulfhydryl oxidase 1	9.20629	9.26821	9.16776	9.20208	7.36378	7.03507	7.46069	7.35283	9.83255e-07	1.20792e-05	1.90799
8117054	NM_006366	CAP2	CAP, adenylate cyclase-associated protein, 2 (yeast)	10.4169	10.6987	10.4513	10.6455	8.57734	8.58308	8.69849	8.73479	3.76894e-07	6.73759e-06	1.90467
8118682	NR_027692	PHF1	PHD finger protein 1	9.00681	9.07765	8.92783	9.09418	7.18068	6.86977	7.16425	7.27315	1.01936e-06	1.24051e-05	1.90466
7992722	NM_006799	PRSS21	protease, serine, 21 (testisin)	9.01072	8.78188	9.01344	8.87285	7.06791	6.98588	6.93278	7.07386	1.13787e-07	3.39078e-06	1.90462
8031047	NM_001020818	MYADM	myeloid-associated differentiation marker	10.2088	10.5578	10.2206	10.4832	8.61639	8.20734	8.48781	8.56945	5.96416e-06	3.76883e-05	1.89737
8019622	NM_145041	TMEM106A	transmembrane protein 106A	7.58301	8.35535	7.84322	8.15316	6.04005	6.02772	6.06336	6.21891	3.75463e-05	0.000135473	1.89617
7920258	NM_014624	S100A6	S100 calcium binding protein A6	8.71072	8.50953	8.88001	8.62455	7.06377	6.87144	6.64217	6.57996	8.44852e-06	4.76076e-05	1.89187
8090214	NM_024628	SLC12A8	solute carrier family 12 (potassium/chloride transporters), member 8	8.11594	8.71026	8.2817	8.45602	6.83554	6.39352	6.41527	6.35215	3.13639e-05	0.000119276	1.89186
8065569	NM_138578	BCL2L1	BCL2-like 1	9.85361	10.1332	9.90824	10.1741	8.02361	8.05735	8.16253	8.26068	1.13298e-06	1.33613e-05	1.89126
7955637	NM_199187	KRT18	keratin 18	11.4337	11.4591	11.4441	11.3381	9.59887	9.59916	9.49069	9.42176	2.70598e-08	1.4488e-06	1.89112
8110569	NM_003900	SQSTM1	sequestosome 1	11.4202	11.6034	11.4962	11.5111	9.67857	9.6823	9.68679	9.42396	2.53199e-07	5.41518e-06	1.88981
8178590	NM_013974	DDAH2	dimethylarginine dimethylaminohydrolase 2	9.1895	9.06615	9.18349	8.78608	7.04596	7.13259	7.27467	7.22304	2.14149e-06	1.94498e-05	1.88724
8179819	NM_013974	DDAH2	dimethylarginine dimethylaminohydrolase 2	9.1895	9.06615	9.18349	8.78608	7.04596	7.13259	7.27467	7.22304	2.14149e-06	1.94498e-05	1.88724
8164580	NM_004878	PTGES	prostaglandin E synthase	8.73371	9.04512	8.67213	9.01771	7.06156	6.96669	7.0669	6.82779	2.64756e-06	2.21379e-05	1.88643
8150509	NM_000930	PLAT	plasminogen activator, tissue	11.2445	11.1911	11.2713	11.1174	9.33654	9.28449	9.35189	9.30635	3.91065e-09	5.89351e-07	1.88626
8099982	NM_004307	APBB2	amyloid beta (A4) precursor protein-binding, family B, member 2	9.85398	10.1603	9.8284	10.0366	7.96876	8.12688	8.09403	8.15642	7.15644e-07	9.99476e-06	1.8833
7970329	NM_000820	GAS6	growth arrest-specific 6	8.12152	8.45133	7.99667	8.12274	6.18432	6.5543	6.53259	5.89461	5.23038e-05	0.000174174	1.88161
8115814	NM_001017995	SH3PXD2B	SH3 and PX domains 2B	9.63939	9.91869	9.59397	9.93583	7.87583	7.83291	7.98005	7.88534	1.1114e-06	1.31935e-05	1.87844
8174092	NM_014782	ARMCX2	armadillo repeat containing, X-linked 2	7.2846	7.11494	7.00768	7.21646	5.2094	4.95857	5.56791	5.37944	1.19979e-05	6.07732e-05	1.87709
8087337	NM_002292	LAMB2	laminin, beta 2 (laminin S)	9.48694	9.6812	9.35352	9.58711	7.63286	7.61935	7.68008	7.66912	2.04147e-07	4.79573e-06	1.87684
7926239	NM_001008211	OPTN	optineurin	9.68243	9.69532	9.882	9.83358	7.73069	7.96751	7.97836	7.92206	2.97065e-07	5.95073e-06	1.87368
8180317	NM_173210	TGIF1	TGFB-induced factor homeobox 1	10.4102	10.7315	10.3827	10.5861	8.73256	8.7262	8.63848	8.52364	1.10882e-06	1.31843e-05	1.87239
8179049	NR_024240	HLA-J	major histocompatibility complex, class I, J (pseudogene)	13.2556	13.2862	13.2366	13.4991	11.4517	11.4044	11.4689	11.4634	9.19322e-08	3.04729e-06	1.87226
7969574	NR_030754	MIR622	microRNA 622	11.8692	11.7613	11.7023	11.7001	9.89664	9.86603	10.0415	9.74382	2.29908e-07	5.06757e-06	1.87123
7957861	NM_178826	ANO4	anoctamin 4	7.25478	7.56799	7.44695	7.55896	5.72659	5.34255	5.48298	5.79221	6.36356e-06	3.94011e-05	1.87108
8005679	NR_023380	CCDC144C	coiled-coil domain containing 144C	9.21409	8.97911	9.22633	8.889	7.29327	7.34708	7.2932	6.89637	8.62512e-06	4.82041e-05	1.86965
7935180	NM_020992	PDLIM1	PDZ and LIM domain 1	10.5543	10.7094	10.6051	10.6853	8.72919	8.4199	8.81522	9.1164	1.49436e-05	7.08661e-05	1.86834
7987439	NM_007223	GPR176	G protein-coupled receptor 176	8.27625	8.35055	8.34401	8.29666	6.44563	6.4731	6.56292	6.31605	3.95553e-08	1.75688e-06	1.86744
8003322	NM_000101	CYBA	cytochrome b-245, alpha polypeptide	9.16266	8.65794	8.97359	8.58815	7.09823	7.08203	6.88007	6.86783	1.57904e-05	7.36424e-05	1.86355
7949264	NM_006795	EHD1	EH-domain containing 1	9.00935	8.96247	8.97928	9.05484	7.2706	6.91755	7.28717	7.08211	8.11345e-07	1.0763e-05	1.86213
8077851	NM_001098213	HRH1	histamine receptor H1	7.30464	7.50341	7.39486	7.54819	5.50282	5.67059	5.46157	5.6677	3.38551e-07	6.30934e-06	1.86211
7907611	NM_170692	RASAL2	RAS protein activator like 2	9.23586	9.48041	9.30818	9.49561	7.39015	7.59549	7.60407	7.48394	4.71482e-07	7.61928e-06	1.8616
7897227	NM_018836	AJAP1	adherens junctions associated protein 1	7.45189	8.36915	7.43726	7.87214	6.04799	5.99085	5.85186	5.80088	0.000180314	0.000441449	1.85971
8078350	NM_001024847	TGFBR2	transforming growth factor, beta receptor II (70/80kDa)	9.13662	9.34587	9.29877	9.2724	7.41309	7.32259	7.57231	7.31565	2.79308e-07	5.75343e-06	1.8575
7897522	NM_052960	RBP7	retinol binding protein 7, cellular	6.66304	6.66633	6.87129	6.91847	5.18037	4.78806	4.8165	4.90673	3.04936e-06	2.42045e-05	1.85686
8118116	NM_005931	MICB	MHC class I polypeptide-related sequence B	9.6637	9.66091	9.67569	9.53248	7.74991	7.95358	7.91627	7.50156	2.55391e-06	2.15778e-05	1.85287
7909441	NM_015714	G0S2	G0/G1switch 2	9.58965	9.51335	9.32802	9.46254	7.53613	7.68334	7.75129	7.52535	3.77587e-07	6.74068e-06	1.84936
7905233	NM_019032	ADAMTSL4	ADAMTS-like 4	7.76492	7.94498	7.80394	8.22263	6.1426	5.58976	6.43707	6.18238	0.000108821	0.000300017	1.84616
7948630	NM_021727	FADS3	fatty acid desaturase 3	10.4155	10.653	10.3719	10.5845	8.59124	8.69725	8.61454	8.74093	3.12249e-07	6.15033e-06	1.84526
7926786	NM_019043	APBB1IP	amyloid beta (A4) precursor protein-binding, family B, member 1 interacting protein	7.06209	7.30608	6.76563	7.31181	5.18139	5.53858	5.11221	5.24595	2.54127e-05	0.000102701	1.84187
8010139	NM_001143998	SEC14L1	SEC14-like 1 (S. cerevisiae)	9.29308	9.38752	9.17098	9.23331	7.60216	7.36177	7.33309	7.42387	3.2387e-07	6.23277e-06	1.841
8055153	NM_001099771	POTEF	POTE ankyrin domain family, member F	6.58731	6.86751	6.61032	6.97445	4.79584	4.92836	4.88664	5.06859	3.11043e-06	2.44617e-05	1.84004
8012197	NM_020360	PLSCR3	phospholipid scramblase 3	8.44487	8.65192	8.49754	8.62619	6.66338	6.90742	6.65841	6.63227	4.93215e-07	7.85299e-06	1.83976
8136983	NR_002158	OR2A20P	olfactory receptor, family 2, subfamily A, member 20 pseudogene	7.6999	7.47888	7.6457	7.64545	6.17509	5.79141	5.68684	5.46356	2.26917e-05	9.48393e-05	1.83826
8127234	NM_015548	DST	dystonin	10.4001	10.4564	10.5189	10.5146	8.49707	8.53128	8.68549	8.82507	4.64731e-07	7.56116e-06	1.8378
7943413	NM_001165	BIRC3	baculoviral IAP repeat containing 3	7.34905	6.88771	7.27354	6.93035	5.06895	5.42847	5.22863	5.37844	1.36475e-05	6.67216e-05	1.83404
8090193	NM_020733	HEG1	HEG homolog 1 (zebrafish)	9.67398	10.0639	9.56054	10.074	8.05182	7.87172	8.04684	8.07353	1.25187e-05	6.28629e-05	1.83213
8004266	NM_201566	SLC16A13	solute carrier family 16, member 13 (monocarboxylic acid transporter 13)	8.20436	8.55157	8.39007	8.34619	6.39151	6.25225	6.7505	6.79209	1.94476e-05	8.53347e-05	1.82646
8005231	NR_026810	FAM106CP	family with sequence similarity 106, member C pseudogene	8.21971	8.62623	8.2359	8.57004	6.7324	6.40739	6.73849	6.47531	1.14388e-05	5.87606e-05	1.82457
8028325	NM_033520	C19orf33	chromosome 19 open reading frame 33	9.77366	9.57743	9.50082	9.71801	7.92025	7.95119	7.91248	7.49511	6.63722e-06	4.06142e-05	1.82272
8043945	NM_145686	MAP4K4	mitogen-activated protein kinase kinase kinase kinase 4	10.3693	10.5231	10.4227	10.4745	8.41955	8.66579	8.69326	8.72917	3.98263e-07	6.92425e-06	1.82045
7999149	NM_020677	NMRAL1	NmrA-like family domain containing 1	8.9335	8.80862	8.99702	8.72997	7.00116	7.10511	6.98174	7.10463	1.90774e-07	4.64762e-06	1.81912
7942123	NM_053056	CCND1	cyclin D1	10.311	10.394	10.2542	10.3106	8.37029	8.38906	8.69569	8.54261	5.20703e-07	8.10155e-06	1.81802
8136918	NM_003461	ZYX	zyxin	9.4177	9.80352	9.41831	9.75004	7.73133	7.59861	7.83808	7.95724	8.07697e-06	4.62376e-05	1.81608
8013268	NR_026809	FAM106A	family with sequence similarity 106, member A	8.44956	8.80283	8.46473	8.74554	7.02154	6.4833	6.96112	6.75521	2.17114e-05	9.18679e-05	1.81037
8134454	NM_015379	BRI3	brain protein I3	10.2657	9.83484	10.2006	9.90426	8.16388	8.36398	8.29983	8.1426	5.20596e-06	3.45194e-05	1.80877
8047300	NM_001159	AOX1	aldehyde oxidase 1	7.09168	6.93366	6.93024	6.69718	5.24132	5.20383	4.91733	5.07076	3.18121e-06	2.48821e-05	1.80488
7984079	NM_000366	TPM1	tropomyosin 1 (alpha)	9.21123	9.40808	9.17876	9.49396	7.56015	7.47577	7.49517	7.5418	4.52006e-07	7.4249e-06	1.80479
7942118	NM_138768	MYEOV	myeloma overexpressed (in a subset of t(11;14) positive multiple myelomas)	8.82716	8.98941	8.78148	8.79525	6.9302	7.0186	7.37387	6.85161	6.86941e-06	4.16229e-05	1.80475
8113709	NM_002317	LOX	lysyl oxidase	10.8111	10.9431	10.7705	10.9313	8.93813	9.10793	9.13749	9.05497	1.04753e-07	3.2873e-06	1.80439
8044333	NR_027467	LIMS3	LIM and senescent cell antigen-like domains 3	10.5954	10.5843	10.5991	10.4617	8.55811	8.84444	8.7887	8.84025	3.5145e-07	6.47935e-06	1.80223
8054519	NR_027467	LIMS3	LIM and senescent cell antigen-like domains 3	10.5954	10.5843	10.5991	10.4617	8.55811	8.84444	8.7887	8.84025	3.5145e-07	6.47935e-06	1.80223
8092177	NM_001146276	NCEH1	neutral cholesterol ester hydrolase 1	10.3146	10.4749	10.4026	10.5007	8.72637	8.50478	8.61009	8.64613	1.11105e-07	3.36444e-06	1.80137
8133788	NM_002835	PTPN12	protein tyrosine phosphatase, non-receptor type 12	9.79667	10.0537	9.85215	10.1453	8.01188	8.01684	8.17766	8.43616	8.49687e-06	4.77663e-05	1.80131
8143629	NR_002157	OR2A9P	olfactory receptor, family 2, subfamily A, member 9 pseudogene	7.64567	7.50714	7.64565	7.64545	6.17509	5.77906	5.67734	5.60821	9.33958e-06	5.10743e-05	1.80106
8179019	NM_018950	HLA-F	major histocompatibility complex, class I, F	9.11854	9.03239	8.84584	8.96056	7.28466	6.95238	7.58858	6.92997	3.67645e-05	0.000133547	1.80043
8015759	NM_006373	VAT1	vesicle amine transport protein 1 homolog (T. californica)	10.8157	10.9211	10.8125	10.8713	9.07077	9.03918	9.10358	9.00925	2.48165e-09	4.92151e-07	1.79945
8011193	NR_028504	MIR22HG	MIR22 host gene (non-protein coding)	8.79619	8.77438	8.75767	8.54941	7.19159	6.65632	7.02652	6.81021	9.2956e-06	5.09197e-05	1.79825
8180316	NM_173209	TGIF1	TGFB-induced factor homeobox 1	10.9669	11.1892	10.8511	11.0919	9.34858	9.20269	9.14632	9.21868	7.40812e-07	1.01327e-05	1.79571
8180318	NM_173211	TGIF1	TGFB-induced factor homeobox 1	10.9669	11.1892	10.8511	11.0919	9.34858	9.20269	9.14632	9.21868	7.40812e-07	1.01327e-05	1.79571
7984364	NM_005902	SMAD3	SMAD family member 3	9.33724	9.47837	9.32041	9.35985	7.49543	7.65756	7.55529	7.60712	3.05941e-08	1.54286e-06	1.79511
8152867	NM_018482	ASAP1	ArfGAP with SH3 domain, ankyrin repeat and PH domain 1	10.9247	11.2278	10.9622	11.3469	9.20363	9.11026	9.47124	9.50621	1.49754e-05	7.0991e-05	1.79258
7949754	NM_013246	CLCF1	cardiotrophin-like cytokine factor 1	8.50662	8.93434	8.76599	8.8484	7.06888	6.89815	6.95907	6.97706	1.84229e-06	1.78896e-05	1.78805
8180319	NM_174886	TGIF1	TGFB-induced factor homeobox 1	10.3812	10.5989	10.3299	10.545	8.7625	8.672	8.60521	8.66372	2.81176e-07	5.75702e-06	1.7879
8097717	NM_024605	ARHGAP10	Rho GTPase activating protein 10	8.22625	8.35269	8.1695	8.36382	6.47501	6.51435	6.47004	6.50212	2.81288e-08	1.46681e-06	1.78769
8035793	NM_001159293	ZNF737	zinc finger protein 737	7.6524	8.59657	7.82724	8.39075	6.37043	6.28949	5.88066	6.78671	0.000864076	0.00153536	1.78492
7996819	NM_001793	CDH3	cadherin 3, type 1, P-cadherin (placental)	8.08435	8.28875	8.02342	8.36362	6.26159	6.50047	6.41337	6.44768	1.55618e-06	1.62784e-05	1.78426
7972713	NM_004093	EFNB2	ephrin-B2	8.34314	8.60859	8.44789	8.62948	6.70045	6.57892	6.6573	6.97574	3.53915e-06	2.69502e-05	1.77918
7972826	NR_027701	LINC00346	long intergenic non-protein coding RNA 346	7.0987	7.41476	7.44927	7.13361	5.35997	5.52465	5.66453	5.43212	4.13103e-06	2.96294e-05	1.77877
8077786	NM_001570	IRAK2	interleukin-1 receptor-associated kinase 2	7.99761	8.25783	8.03187	8.32026	6.3324	6.59388	6.24958	6.31976	3.64469e-06	2.7368e-05	1.77799
8117777	NR_001434	HLA-H	major histocompatibility complex, class I, H (pseudogene)	11.1492	11.1151	11.0988	11.0989	9.41326	9.25908	9.36408	9.32779	3.66135e-09	5.85379e-07	1.77445
8039340	NM_003283	TNNT1	troponin T type 1 (skeletal, slow)	9.05087	8.93632	9.05458	8.81495	7.28925	7.27894	7.0625	7.14109	5.19446e-07	8.10155e-06	1.77123
8106098	NM_005909	MAP1B	microtubule-associated protein 1B	11.8415	11.8996	11.8329	11.8945	10.0991	9.94062	10.2354	10.1193	1.36191e-07	3.76356e-06	1.76854
7950864	NM_001014811	ME3	malic enzyme 3, NADP(+)-dependent, mitochondrial	8.10044	8.39529	7.97555	8.27151	6.12774	6.5736	6.48445	6.48456	1.24375e-05	6.25036e-05	1.76811
8077490	NM_014583	LMCD1	LIM and cysteine-rich domains 1	8.9627	8.95959	8.9084	8.85705	6.92482	6.97668	7.15471	7.55984	1.93482e-05	8.50333e-05	1.76792
8037231	NM_021016	PSG3	pregnancy specific beta-1-glycoprotein 3	4.76188	6.28921	4.9779	6.11191	3.82124	3.67645	3.81644	3.76595	0.00398126	0.00536041	1.76521
8123598	NM_030666	SERPINB1	serpin peptidase inhibitor, clade B (ovalbumin), member 1	9.4449	9.54203	9.60443	9.55411	7.654	7.7479	7.73452	7.95133	2.92278e-07	5.90044e-06	1.76443
8041447	NM_016441	CRIM1	cysteine rich transmembrane BMP regulator 1 (chordin-like)	10.039	10.2632	10.0582	10.1875	8.21873	8.30829	8.40097	8.56342	1.21766e-06	1.3986e-05	1.76413
7970376	NM_032436	CHAMP1	chromosome alignment maintaining phosphoprotein 1	8.2877	8.83009	8.4756	8.94029	6.85426	6.51615	6.94147	7.16634	0.000129138	0.00034206	1.76386
8174527	NM_014289	CAPN6	calpain 6	7.7129	7.86375	7.72805	8.03271	6.36425	5.93769	6.06789	5.92064	8.61887e-06	4.81903e-05	1.76173
8173755	NM_004867	ITM2A	integral membrane protein 2A	6.78916	6.76352	6.83659	7.05375	5.0064	5.16449	5.12981	5.10808	3.73709e-07	6.70551e-06	1.75856
8085665	NM_015150	RFTN1	raftlin, lipid raft linker 1	8.98229	8.83283	8.84689	8.8386	7.23403	7.1451	6.93808	7.1568	3.31005e-07	6.30532e-06	1.75665
8154725	NM_000224	KRT18	keratin 18	11.026	10.9617	10.8627	10.9254	9.39755	9.14952	9.23325	8.96911	1.66002e-06	1.67471e-05	1.75657
8138542	NM_000600	IL6	interleukin 6 (interferon, beta 2)	6.32191	6.54297	6.55793	6.37162	4.72647	4.71674	4.67486	4.68438	1.19898e-07	3.49201e-06	1.74799
8125048	NM_013974	DDAH2	dimethylarginine dimethylaminohydrolase 2	8.95709	8.77936	8.91414	8.41596	6.9463	6.97478	7.08612	7.08039	9.6871e-06	5.24223e-05	1.74474
8051298	NM_024572	GALNT14	UDP-N-acetyl-alpha-D-galactosamine:polypeptide N-acetylgalactosaminyltransferase 14 (GalNAc-T14)	8.27307	8.18135	8.31524	8.23187	6.57399	6.6196	6.40621	6.42417	1.15986e-07	3.43991e-06	1.74439
8045257	NM_001083538	POTEE	POTE ankyrin domain family, member E	6.6028	6.90748	6.73172	6.91486	4.97289	5.06469	5.09073	5.05265	5.79975e-07	8.77105e-06	1.74398
7924450	NM_007207	DUSP10	dual specificity phosphatase 10	7.97704	8.165	7.95627	8.18378	6.44527	6.26523	6.4047	6.20366	7.62466e-07	1.03069e-05	1.74081
8168691	NM_006729	DIAPH2	diaphanous homolog 2 (Drosophila)	7.9649	8.27185	8.02731	8.25492	6.08334	6.31578	6.47782	6.68503	2.41972e-05	9.91805e-05	1.73925
8037005	NM_000660	TGFB1	transforming growth factor, beta 1	8.50644	8.66546	8.72133	8.67415	6.92602	6.72572	6.9598	7.02342	6.07635e-07	9.05845e-06	1.7331
8171284	NM_000273	GPR143	G protein-coupled receptor 143	8.00332	7.99138	7.9835	7.77375	5.95202	6.56728	6.20952	6.09533	1.88116e-05	8.32964e-05	1.73195
8168868	NM_016608	ARMCX1	armadillo repeat containing, X-linked 1	7.08738	7.06875	7.32646	7.09327	5.35257	5.37687	5.60099	5.31973	1.14634e-06	1.3482e-05	1.73143
8110982	NM_004394	DAP	death-associated protein	11.2473	11.4945	11.2204	11.5208	9.72196	9.71227	9.48174	9.64415	1.97998e-06	1.85777e-05	1.73073
7919168	NM_022359	PDE4DIP	phosphodiesterase 4D interacting protein	9.36706	9.27207	9.30663	9.20573	7.52247	7.65312	7.69781	7.37829	6.21625e-07	9.18771e-06	1.72495
8004416	NM_000747	CHRNB1	cholinergic receptor, nicotinic, beta 1 (muscle)	9.42301	9.50142	9.38347	9.24521	7.79762	7.50428	7.56619	7.7916	1.58915e-06	1.64306e-05	1.72336
8140478	NM_017439	PION	pigeon homolog (Drosophila)	6.24059	6.52179	5.99888	6.27105	4.49542	4.64541	4.41968	4.57878	6.36593e-06	3.94011e-05	1.72326
7970287	NM_005561	LAMP1	lysosomal-associated membrane protein 1	9.65124	9.79063	9.63805	9.55243	8.05406	7.75421	8.02527	7.91292	8.77582e-07	1.1228e-05	1.72147
8066905	NM_021035	ZNFX1	zinc finger, NFX1-type containing 1	9.48057	9.7522	9.44694	9.72928	7.93455	7.61403	8.00046	7.97411	7.4069e-06	4.37745e-05	1.72146
8178802	NM_022555	HLA-DRB3	major histocompatibility complex, class II, DR beta 3	9.03387	8.976	9.06313	9.15527	7.18908	7.24579	7.47025	7.43743	6.08538e-07	9.05845e-06	1.72143
7947681	NM_004308	ARHGAP1	Rho GTPase activating protein 1	9.91079	10.2486	9.983	10.2229	8.5292	8.13676	8.43312	8.38369	6.9019e-06	4.18002e-05	1.72065
7955502	NM_014191	SCN8A	sodium channel, voltage gated, type VIII, alpha subunit	8.0583	8.4015	8.08089	8.3649	6.5558	6.3029	6.64364	6.52402	6.00772e-06	3.79168e-05	1.71981
8152764	NM_014751	MTSS1	metastasis suppressor 1	8.08119	8.29416	8.28135	8.23941	6.27161	6.29407	6.9535	6.50596	4.69403e-05	0.000160732	1.71774
7986293	NM_018349	MCTP2	multiple C2 domains, transmembrane 2	6.20849	6.77876	6.65216	6.86173	5.06434	5.19207	4.81203	4.58395	0.000133936	0.000351109	1.71219
8152962	NM_012472	LRRC6	leucine rich repeat containing 6	6.63042	7.24467	6.63789	7.47281	5.54027	5.29604	5.34405	4.9709	0.000429145	0.000873285	1.70863
8178955	NM_004761	RGL2	ral guanine nucleotide dissociation stimulator-like 2	8.83189	8.8346	8.7035	8.74657	7.15293	7.03019	7.09569	7.01572	2.35271e-08	1.30752e-06	1.70551
8180144	NM_004761	RGL2	ral guanine nucleotide dissociation stimulator-like 2	8.83189	8.8346	8.7035	8.74657	7.15293	7.03019	7.09569	7.01572	2.35271e-08	1.30752e-06	1.70551
8116070	NM_005451	PDLIM7	PDZ and LIM domain 7 (enigma)	9.37224	9.57559	9.29123	9.49387	7.67327	7.89966	7.80362	7.54032	2.69241e-06	2.2383e-05	1.70401
7928589	NM_005729	PPIF	peptidylprolyl isomerase F	11.284	11.1882	11.2314	11.0415	9.41538	9.37238	9.59976	9.5524	4.86641e-07	7.77077e-06	1.70128
8048926	NM_138402	SP140L	SP140 nuclear body protein-like	6.61617	6.64511	6.5602	6.86985	4.99977	4.85565	4.90988	5.13185	1.51752e-06	1.6014e-05	1.69854
7913593	NM_003196	TCEA3	transcription elongation factor A (SII), 3	8.01974	8.15202	7.87584	8.27719	6.60623	6.24068	6.36045	6.34057	6.49337e-06	4.00184e-05	1.69421
7959267	NM_002560	P2RX4	purinergic receptor P2X, ligand-gated ion channel, 4	8.89108	9.03478	8.86235	8.93106	7.38629	7.08371	7.31413	7.16013	6.66969e-07	9.58346e-06	1.69375
7930413	NM_004419	DUSP5	dual specificity phosphatase 5	9.62162	9.2552	9.72555	9.101	7.73921	7.95591	7.62513	7.61039	5.56314e-05	0.000182304	1.69318
8007483	NM_145041	TMEM106A	transmembrane protein 106A	7.4621	8.26286	7.83527	7.98768	6.16104	6.21383	6.17238	6.23681	5.56687e-05	0.00018238	1.69096
8166469	NR_027783	SAT1	spermidine/spermine N1-acetyltransferase 1	11.8376	11.8587	12.0269	11.9055	10.2722	10.2288	10.052	10.3121	3.68757e-07	6.63949e-06	1.6909
8118111	NM_006674	HCP5	HLA complex P5 (non-protein coding)	7.94607	8.06352	8.03624	7.99853	6.25147	6.06733	6.54174	6.42221	3.95202e-06	2.87432e-05	1.6904
8117813	NR_024240	HLA-J	major histocompatibility complex, class I, J (pseudogene)	13.031	13.0696	13.0913	13.1311	11.3952	11.329	11.4492	11.3957	3.28113e-09	5.62314e-07	1.68844
7942332	NM_016724	FOLR1	folate receptor 1 (adult)	7.39594	7.18432	7.12073	7.19406	5.79739	5.3657	5.37224	5.60733	7.93498e-06	4.55455e-05	1.68809
8103859	NM_001012732	DCTD	dCMP deaminase	10.1392	10.2576	10.2019	10.3092	8.39614	8.50672	8.64111	8.61219	2.49127e-07	5.37241e-06	1.68794
8141241	NM_020429	SMURF1	SMAD specific E3 ubiquitin protein ligase 1	9.32349	9.51171	9.36268	9.55544	7.58809	7.70269	7.76993	7.94552	1.87541e-06	1.80314e-05	1.68677
8144082	NR_026865	C7orf13	chromosome 7 open reading frame 13	7.74348	7.88565	7.94442	7.85823	6.2197	6.13938	6.14796	6.18584	2.78346e-08	1.46053e-06	1.68473
8150126	NM_001009552	PPP2CB	protein phosphatase 2, catalytic subunit, beta isozyme	10.3421	10.4359	10.4868	10.4703	8.86523	8.87692	8.44241	8.81564	4.49225e-06	3.14204e-05	1.6837
7934196	NM_002778	PSAP	prosaposin	11.4495	11.4052	11.4314	11.3789	9.82817	9.63061	9.77012	9.70562	2.50974e-08	1.3586e-06	1.68263
8100977	NM_002994	CXCL5	chemokine (C-X-C motif) ligand 5	8.45729	8.19891	8.2752	8.38961	6.78299	6.71849	6.45609	6.63339	1.65311e-06	1.67471e-05	1.68251
8180301	NM_023011	UPF3A	UPF3 regulator of nonsense transcripts homolog A (yeast)	9.11044	9.15288	9.04653	9.09704	7.34098	7.51547	7.30309	7.51756	1.46722e-07	3.93755e-06	1.68245
8085138	NM_000916	OXTR	oxytocin receptor	8.17712	8.24083	8.20298	8.24324	6.09718	6.82814	6.70888	6.51338	4.56718e-05	0.00015789	1.67915
7948354	NM_145016	GLYATL2	glycine-N-acyltransferase-like 2	6.21716	6.67189	6.13654	6.99747	4.81715	4.93068	4.49912	5.06181	0.000379089	0.000792963	1.67858
8180273	NM_031864	PCDHA12	protocadherin alpha 12	7.49908	8.15082	7.62147	7.84508	6.39323	5.87406	6.40797	5.74384	0.000299137	0.000657784	1.67434
8008784	NM_018304	PRR11	proline rich 11	11.0409	11.08	11.069	11.1215	9.45362	9.37995	9.34442	9.44245	2.63876e-09	4.92151e-07	1.67277
8023575	NM_133459	CCBE1	collagen and calcium binding EGF domains 1	7.42455	7.57985	7.5426	7.75113	6.0715	5.93257	5.83874	5.76487	2.09093e-06	1.91998e-05	1.67261
8033746	NM_198535	ZNF699	zinc finger protein 699	7.00269	7.19162	7.01605	7.00437	5.27677	5.3524	5.28186	5.6147	1.78695e-06	1.75321e-05	1.67225
8064471	NM_006065	SIRPB1	signal-regulatory protein beta 1	7.59292	7.95765	7.80537	8.06566	6.26983	6.46361	6.15378	5.8457	5.37997e-05	0.00017774	1.67217
7932966	NM_033666	NA	NA	10.9879	11.0649	11.0003	11.1188	9.42296	9.33765	9.29795	9.42777	2.28544e-08	1.30523e-06	1.67139
7956211	NM_021019	MYL6	myosin, light chain 6, alkali, smooth muscle and non-muscle	12.6658	12.4754	12.6928	12.3679	10.9818	11.0515	10.812	10.6805	6.46715e-06	3.99132e-05	1.66903
8168749	NM_014467	SRPX2	sushi-repeat containing protein, X-linked 2	7.3412	7.81594	7.56505	7.479	5.89841	5.80661	5.89014	5.93205	3.58668e-06	2.71526e-05	1.66849
7934885	NM_018363	RNLS	renalase, FAD-dependent amine oxidase	8.05324	8.19245	7.65318	8.15021	6.53271	6.27279	6.26379	6.32224	2.00023e-05	8.70519e-05	1.66438
7920642	NM_001018016	MUC1	mucin 1, cell surface associated	7.4775	8.03529	7.63684	8.1721	6.54119	6.40264	5.6773	6.04515	0.000598769	0.00114006	1.66387
8123644	NM_001069	TUBB2A	tubulin, beta 2A class IIa	10.8649	10.7808	10.7993	10.7042	9.20586	9.06865	9.17001	9.04974	5.15768e-08	2.07597e-06	1.66372
8104788	NM_001145525	RAI14	retinoic acid induced 14	10.1897	10.4683	10.2199	10.4458	8.52273	8.66337	8.74754	8.73792	1.59369e-06	1.64582e-05	1.66301
7929919	NM_030971	SFXN3	sideroflexin 3	9.20814	9.27564	8.88664	8.94477	7.40502	7.36854	7.39767	7.50084	3.05902e-06	2.42045e-05	1.66078
8158317	NM_001130438	SPTAN1	spectrin, alpha, non-erythrocytic 1	10.2901	10.3134	10.2826	10.3199	8.54386	8.57281	8.79494	8.65289	1.07634e-07	3.31667e-06	1.66038
8115783	NM_005990	STK10	serine/threonine kinase 10	9.05283	9.05836	9.04642	8.94485	7.32631	7.20124	7.45862	7.4761	3.57771e-07	6.54006e-06	1.66005
8041781	NM_001430	EPAS1	endothelial PAS domain protein 1	8.77744	9.041	8.80631	9.00226	7.33597	7.18583	7.2957	7.16998	7.28342e-07	1.01068e-05	1.65988
8068593	NM_005239	ETS2	v-ets erythroblastosis virus E26 oncogene homolog 2 (avian)	10.1855	10.0611	10.1494	9.99555	8.4846	8.31349	8.50544	8.44868	1.61032e-07	4.11461e-06	1.65982
8029950	NM_014601	EHD2	EH-domain containing 2	8.72547	8.90557	8.76891	8.61538	7.12732	7.18375	7.03289	7.03566	3.84317e-07	6.81389e-06	1.65893
7992789	NM_016639	TNFRSF12A	tumor necrosis factor receptor superfamily, member 12A	11.8103	11.5897	11.6679	11.5133	10.0868	10.0389	9.99569	9.82791	1.16082e-06	1.36058e-05	1.65796
8089820	NM_153002	GPR156	G protein-coupled receptor 156	6.99841	7.23241	7.06094	7.29815	5.58654	5.34898	5.47407	5.54867	1.42617e-06	1.54075e-05	1.65791
8125687	NM_004761	RGL2	ral guanine nucleotide dissociation stimulator-like 2	8.66292	8.75474	8.64482	8.66675	7.08703	6.96595	7.05368	6.99118	8.49087e-09	7.917e-07	1.65785
8111153	NM_012334	MYO10	myosin X	9.51199	9.49801	9.54791	9.56182	7.7242	7.76448	8.02253	7.97971	6.34925e-07	9.28778e-06	1.6572
8177955	NM_005931	MICB	MHC class I polypeptide-related sequence B	9.40892	9.42768	9.50912	9.33168	7.86002	7.8923	7.89133	7.41168	1.04896e-05	5.54675e-05	1.65551
8022531	NM_000271	NPC1	Niemann-Pick disease, type C1	10.9883	11.1343	11.1258	11.105	9.37478	9.31636	9.52755	9.51817	1.93267e-07	4.68195e-06	1.65414
7993281	NM_001080530	SNX29	sorting nexin 29	8.27853	8.42669	8.35766	8.47116	6.75662	6.46251	6.78652	6.91604	4.07092e-06	2.93445e-05	1.65309
7911218	NM_015431	TRIM58	tripartite motif containing 58	8.20153	8.35473	8.29849	8.39015	6.78992	6.5871	6.67791	6.58202	2.19665e-07	4.99749e-06	1.65199
7897449	NM_025106	SPSB1	splA/ryanodine receptor domain and SOCS box containing 1	8.17556	7.97377	8.118	7.80246	6.55922	6.46218	6.16392	6.27934	1.00156e-05	5.3619e-05	1.65128
8050702	NM_004881	TP53I3	tumor protein p53 inducible protein 3	8.08995	8.08117	7.93989	7.77429	6.07163	6.3237	6.62123	6.26582	1.88522e-05	8.33942e-05	1.65073
8089835	NM_007085	FSTL1	follistatin-like 1	11.2674	11.2874	11.2871	11.3377	9.63802	9.73276	9.60312	9.60691	4.90313e-09	6.30767e-07	1.64968
8125512	NM_000593	TAP1	transporter 1, ATP-binding cassette, sub-family B (MDR/TAP)	9.20384	9.31061	9.13491	9.22095	7.75138	7.40535	7.53133	7.58587	8.68858e-07	1.11604e-05	1.6491
8178867	NM_000593	TAP1	transporter 1, ATP-binding cassette, sub-family B (MDR/TAP)	9.20384	9.31061	9.13491	9.22095	7.75138	7.40535	7.53133	7.58587	8.68858e-07	1.11604e-05	1.6491
8180061	NM_000593	TAP1	transporter 1, ATP-binding cassette, sub-family B (MDR/TAP)	9.20384	9.31061	9.13491	9.22095	7.75138	7.40535	7.53133	7.58587	8.68858e-07	1.11604e-05	1.6491
7955142	NM_000725	CACNB3	calcium channel, voltage-dependent, beta 3 subunit	8.51694	8.85665	8.5637	8.76331	7.03409	7.12687	7.14574	6.80874	6.15302e-06	3.86743e-05	1.64629
8002492	NM_032821	HYDIN	HYDIN, axonemal central pair apparatus protein	6.93685	7.57897	7.19819	7.62704	5.60303	5.92946	5.77827	5.45545	0.000146044	0.000373737	1.64371
8095736	NM_001657	AREG	amphiregulin	8.49625	8.6086	8.47417	8.6117	6.36346	7.00464	7.05809	7.18981	0.000123486	0.000330293	1.64368
8170602	NM_007150	ZNF185	zinc finger protein 185 (LIM domain)	7.97978	8.06655	8.00597	8.1332	6.6757	6.36403	6.15336	6.41985	6.5429e-06	4.01894e-05	1.64314
7976073	NM_013231	FLRT2	fibronectin leucine rich transmembrane protein 2	6.88993	7.22618	7.06983	7.32795	5.45745	5.60084	5.51953	5.37936	4.75751e-06	3.25347e-05	1.63918
8122038	NM_052913	TMEM200A	transmembrane protein 200A	7.49622	7.42535	7.40872	7.33129	5.94868	5.76115	5.91536	5.48082	6.37149e-06	3.94167e-05	1.63889
8103822	NM_005429	VEGFC	vascular endothelial growth factor C	8.68932	8.85963	8.59455	8.78523	6.93046	7.25365	7.17134	7.0276	2.08117e-06	1.9157e-05	1.63642
8180302	NM_080687	UPF3A	UPF3 regulator of nonsense transcripts homolog A (yeast)	9.06255	9.1161	9.00654	9.08469	7.34294	7.49546	7.35975	7.52616	6.83538e-08	2.46084e-06	1.63639
8066745	NM_199441	ZNF334	zinc finger protein 334	6.8675	7.28102	6.93591	7.21081	5.48656	5.41963	5.57685	5.26741	9.92113e-06	5.32877e-05	1.6362
8152703	NM_058229	FBXO32	F-box protein 32	7.36863	7.87242	7.52295	7.82347	5.90853	5.80079	6.18561	6.15646	3.98598e-05	0.000142233	1.63402
8116051	NM_080881	DBN1	drebrin 1	9.48223	9.42112	9.42862	9.39271	7.90897	7.49534	7.94415	7.84606	4.42848e-06	3.11087e-05	1.63254
7970924	NM_178006	STARD13	StAR-related lipid transfer (START) domain containing 13	7.86736	7.91824	7.93535	7.99109	6.29921	6.15993	6.24057	6.48956	6.01011e-07	8.99762e-06	1.63069
8147777	NM_138455	CTHRC1	collagen triple helix repeat containing 1	8.10258	8.09376	8.30656	8.18956	6.569	6.63692	6.65268	6.3145	2.17066e-06	1.95623e-05	1.62984
7909967	NM_001748	CAPN2	calpain 2, (m/II) large subunit	11.2768	11.3469	11.255	11.3082	9.7081	9.60324	9.67977	9.70268	3.49795e-09	5.73865e-07	1.62331
7914021	NM_003047	SLC9A1	solute carrier family 9, subfamily A (NHE1, cation proton antiporter 1), member 1	8.8759	8.94563	8.91514	8.85845	7.42841	7.05377	7.34695	7.27376	1.14216e-06	1.34451e-05	1.62306
8014241	NM_018042	SLFN12	schlafen family member 12	6.20315	6.87044	6.32985	6.47008	4.63033	5.11289	4.78629	4.85352	9.24777e-05	0.000266229	1.62262
7929065	NM_001548	IFIT1	interferon-induced protein with tetratricopeptide repeats 1	6.48492	7.16619	6.62268	6.91544	5.03398	5.14933	5.33835	5.18288	6.33109e-05	0.000200573	1.62117
8145954	NM_006283	TACC1	transforming, acidic coiled-coil containing protein 1	10.3818	10.4671	10.5332	10.4398	8.74538	8.89878	8.81511	8.8814	3.95824e-08	1.75688e-06	1.6203
7956046	NM_201444	DGKA	diacylglycerol kinase, alpha 80kDa	8.75319	9.08961	8.88279	9.04259	7.37224	7.44855	7.26287	7.20601	2.48317e-06	2.1229e-05	1.61963
8124828	NM_005803	FLOT1	flotillin 1	10.1816	10.0592	10.0213	10.0856	8.51875	8.56339	8.49707	8.3021	3.36659e-07	6.30532e-06	1.61661
8178419	NM_005803	FLOT1	flotillin 1	10.1816	10.0592	10.0213	10.0856	8.51875	8.56339	8.49707	8.3021	3.36659e-07	6.30532e-06	1.61661
8179688	NM_005803	FLOT1	flotillin 1	10.1816	10.0592	10.0213	10.0856	8.51875	8.56339	8.49707	8.3021	3.36659e-07	6.30532e-06	1.61661
8116622	NM_003804	RIPK1	receptor (TNFRSF)-interacting serine-threonine kinase 1	9.25101	9.421	9.26738	9.51551	7.69831	7.45276	7.74035	8.09903	3.43796e-05	0.000126945	1.61611
8043100	NM_021103	TMSB10	thymosin beta 10	13.7482	13.6378	13.7158	13.6651	12.0617	12.2481	11.9519	12.0644	3.17882e-07	6.19345e-06	1.61024
8049487	NM_024101	MLPH	melanophilin	7.822	7.7856	7.767	7.70734	6.32049	6.26499	5.93224	6.12836	1.92902e-06	1.83543e-05	1.60897
7917532	NM_004120	GBP2	guanylate binding protein 2, interferon-inducible	6.24544	6.77595	6.30062	6.39596	4.86601	4.83924	4.66149	4.91871	1.85796e-05	8.26078e-05	1.60813
7973629	NM_001048205	REC8	REC8 homolog (yeast)	8.18991	8.26039	8.32997	8.15429	6.73807	6.5968	6.62563	6.55768	1.07073e-07	3.31638e-06	1.6041
8078738	NM_005109	OXSR1	oxidative-stress responsive 1	11.3208	11.3955	11.3481	11.4133	9.69021	9.74415	9.81163	9.82591	1.18849e-08	9.05846e-07	1.60147
8152812	NM_174911	FAM84B	family with sequence similarity 84, member B	8.00304	7.75116	7.96134	7.94189	6.34309	6.41992	6.07959	6.41086	3.2316e-06	2.51976e-05	1.601
8046380	NM_000210	ITGA6	integrin, alpha 6	10.0525	10.1734	10.1501	10.1534	8.2538	8.47947	8.68439	8.71662	6.79789e-06	4.13054e-05	1.59876
7920600	NM_183001	SHC1	SHC (Src homology 2 domain containing) transforming protein 1	9.56699	9.67754	9.52572	9.6092	8.13699	8.01656	7.85257	7.97875	3.53917e-07	6.48792e-06	1.59864
7922773	NM_000433	NCF2	neutrophil cytosolic factor 2	6.83856	6.64729	6.84268	6.91568	5.29066	5.23717	5.35031	4.97568	3.94363e-06	2.87305e-05	1.5976
8137215	NM_001142928	LRRC61	leucine rich repeat containing 61	9.18065	9.01682	8.97398	8.90939	7.39115	7.59905	7.3576	7.35705	1.2037e-06	1.39199e-05	1.594
8144281	NM_014629	ARHGEF10	Rho guanine nucleotide exchange factor (GEF) 10	8.18096	8.64649	8.38476	8.57571	6.80508	6.90535	6.84033	6.86398	5.64334e-06	3.61546e-05	1.59329
7972946	NM_007368	RASA3	RAS p21 protein activator 3	7.51507	7.80642	7.51606	7.64754	6.13725	6.3895	5.73322	5.85229	6.53056e-05	0.000205336	1.59321
7904726	NM_006472	TXNIP	thioredoxin interacting protein	11.3859	11.0496	11.3514	10.8838	9.88551	9.5793	9.42437	9.41045	6.80164e-05	0.000211499	1.59275
7896822	NM_198576	AGRN	agrin	8.20319	8.40086	8.21087	8.3835	6.78623	6.72771	6.77217	6.54133	8.91477e-07	1.13609e-05	1.59275
7911178	NM_004895	NLRP3	NLR family, pyrin domain containing 3	6.91324	6.68457	6.96933	6.69828	5.23511	5.18893	5.274	5.20331	7.4313e-07	1.01348e-05	1.59102
7912157	NM_018948	ERRFI1	ERBB receptor feedback inhibitor 1	10.7735	10.6784	10.8317	10.6738	8.99774	9.11704	9.13726	9.34667	1.22549e-06	1.40185e-05	1.58968
8066939	NM_004776	B4GALT5	UDP-Gal:betaGlcNAc beta 1,4- galactosyltransferase, polypeptide 5	11.7125	11.9509	11.728	11.9211	10.1074	10.1047	10.2477	10.5147	9.0492e-06	4.995e-05	1.58454
8025058	NM_004240	TRIP10	thyroid hormone receptor interactor 10	10.0026	9.89715	9.93943	9.89378	8.396	8.10125	8.30739	8.59273	5.36592e-06	3.5195e-05	1.58389
8009040	NM_006039	MRC2	mannose receptor, C type 2	8.751	8.89137	8.58635	8.7725	7.18967	7.3373	7.03903	7.10312	2.17032e-06	1.95623e-05	1.58303
8153568	NM_201384	PLEC	plectin	8.86007	8.80791	8.76823	8.83936	7.40102	7.19767	7.28102	7.06393	6.6317e-07	9.5653e-06	1.58298
7941714	NM_024650	C11orf80	chromosome 11 open reading frame 80	9.04112	9.28927	9.0412	9.28447	7.6207	7.71187	7.50301	7.49511	1.88645e-06	1.8078e-05	1.58134
7947425	NM_203330	CD59	CD59 molecule, complement regulatory protein	10.5023	10.3623	10.503	10.2997	8.78391	8.84143	8.85111	8.87201	1.12017e-07	3.36845e-06	1.57972
8118571	NM_002800	PSMB9	proteasome (prosome, macropain) subunit, beta type, 9 (large multifunctional peptidase 2)	7.51893	7.73093	7.70354	7.57501	6.09201	6.42419	6.07722	5.61983	9.68147e-05	0.000275411	1.57879
8178211	NM_002800	PSMB9	proteasome (prosome, macropain) subunit, beta type, 9 (large multifunctional peptidase 2)	7.51893	7.73093	7.70354	7.57501	6.09201	6.42419	6.07722	5.61983	9.68147e-05	0.000275411	1.57879
8179495	NM_002800	PSMB9	proteasome (prosome, macropain) subunit, beta type, 9 (large multifunctional peptidase 2)	7.51893	7.73093	7.70354	7.57501	6.09201	6.42419	6.07722	5.61983	9.68147e-05	0.000275411	1.57879
8112139	NM_002184	IL6ST	interleukin 6 signal transducer (gp130, oncostatin M receptor)	11.7085	11.8185	11.721	11.842	10.1117	10.2547	10.1153	10.2948	1.64302e-07	4.16721e-06	1.57841
8092552	NM_006548	IGF2BP2	insulin-like growth factor 2 mRNA binding protein 2	10.0863	10.2391	10.1108	10.1626	8.57185	8.37951	8.64497	8.69147	8.49838e-07	1.11158e-05	1.57775
7915504	NM_022821	ELOVL1	ELOVL fatty acid elongase 1	10.8764	10.9285	10.8247	10.9947	9.2864	8.84642	9.60376	9.58219	0.00012397	0.000331077	1.57636
8105596	NM_001029875	RGS7BP	regulator of G-protein signaling 7 binding protein	6.65872	7.38867	6.70429	7.39919	5.34994	5.52496	5.33865	5.64086	0.000361232	0.000763398	1.57412
8016390	NM_016429	COPZ2	coatomer protein complex, subunit zeta 2	8.27692	8.31895	8.06887	8.19508	6.70528	6.62151	6.54697	6.70716	4.00657e-07	6.93552e-06	1.56972
7931353	NM_006504	PTPRE	protein tyrosine phosphatase, receptor type, E	7.9772	8.22973	7.91897	8.1241	6.64205	6.40432	6.72934	6.1994	2.89187e-05	0.000112621	1.56872
8012896	NM_000304	PMP22	peripheral myelin protein 22	10.473	10.5623	10.5464	10.4718	8.97065	8.84344	8.91112	9.05981	8.60493e-08	2.89772e-06	1.56712
7934733	NM_145869	ANXA11	annexin A11	10.1013	10.1695	10.0675	10.1083	8.38185	8.51717	8.65034	8.63417	3.59455e-07	6.55237e-06	1.56575
7953341	NM_018009	TAPBPL	TAP binding protein-like	7.76467	8.07986	7.85143	7.84716	6.36932	5.87601	6.54745	6.49208	8.47842e-05	0.000250079	1.56456
7953409	NM_002824	PTMS	parathymosin	10.3195	10.6312	10.1735	10.542	8.7662	8.88103	8.91978	8.84801	7.28914e-06	4.33951e-05	1.56279
8172043	NM_006307	SRPX	sushi-repeat containing protein, X-linked	8.64056	8.89581	8.71738	8.81985	7.25182	7.01774	7.27949	7.28067	1.65939e-06	1.67471e-05	1.56097
8005847	NM_021137	TNFAIP1	tumor necrosis factor, alpha-induced protein 1 (endothelial)	9.94288	10.2059	10.0073	10.2488	8.40083	8.63333	8.48532	8.64958	3.38774e-06	2.60421e-05	1.55896
7903854	NM_001010898	SLC6A17	solute carrier family 6, member 17	7.81727	8.27348	7.86766	7.86938	6.08597	6.59714	6.69715	6.21482	0.000137358	0.000357901	1.55818
8132592	NM_002541	OGDH	oxoglutarate (alpha-ketoglutarate) dehydrogenase (lipoamide)	9.6197	9.63747	9.63346	9.59632	7.98897	8.05212	8.12381	8.09353	3.88116e-09	5.89351e-07	1.55713
8079753	NM_001165928	DAG1	dystroglycan 1 (dystrophin-associated glycoprotein 1)	8.89919	8.9678	8.79371	9.11169	7.41253	7.07774	7.60568	7.44999	2.01438e-05	8.74036e-05	1.55661
8025347	NM_025061	LRRC8E	leucine rich repeat containing 8 family, member E	8.30541	8.36105	8.40895	8.30952	6.96782	6.71877	6.78956	6.68605	4.37128e-07	7.24373e-06	1.55568
8165947	NM_015691	WWC3	WWC family member 3	7.08881	7.15971	6.94328	7.10467	5.38379	5.79535	5.3341	5.56092	9.6635e-06	5.23815e-05	1.55558
8086842	NM_002375	MAP4	microtubule-associated protein 4	9.57635	9.76667	9.52718	9.75796	8.11726	7.94269	8.15001	8.19719	1.48563e-06	1.57603e-05	1.55525
7941537	NM_018026	PACS1	phosphofurin acidic cluster sorting protein 1	9.02723	9.35634	9.06958	9.42713	7.51775	7.70712	7.69201	7.74327	8.87437e-06	4.92632e-05	1.55503
8161513	NR_002836	PGM5P2	phosphoglucomutase 5 pseudogene 2	7.70779	7.87255	7.84646	7.9067	6.03565	6.24223	6.517	6.32157	7.33495e-06	4.35532e-05	1.55426
8118794	NM_145899	HMGA1	high mobility group AT-hook 1	10.4765	10.5936	10.5447	10.6114	9.05753	8.9556	9.10762	8.89085	1.69744e-07	4.26154e-06	1.55367
8081386	NM_031419	NFKBIZ	nuclear factor of kappa light polypeptide gene enhancer in B-cells inhibitor, zeta	8.6241	8.38759	8.77934	8.43859	7.07587	6.75081	7.10864	7.08421	1.55792e-05	7.28935e-05	1.55252
8015206	NM_001123387	KRTAP2-1	keratin associated protein 2-1	10.6153	10.3857	10.4716	10.323	9.10651	9.05825	8.84384	8.5836	2.62265e-05	0.000105008	1.55086
7995820	NM_005947	MT1B	metallothionein 1B	8.73411	8.6958	8.37949	8.65518	6.97716	6.93806	7.50348	6.84323	9.46619e-05	0.000271287	1.55066
7934477	NM_172171	CAMK2G	calcium/calmodulin-dependent protein kinase II gamma	10.6466	10.8398	10.5477	10.8372	9.06548	9.1863	9.16502	9.2562	1.47575e-06	1.57165e-05	1.54956
8003773	NM_015085	RAP1GAP2	RAP1 GTPase activating protein 2	8.55507	8.42071	8.59748	8.33122	6.89337	6.91363	6.77449	7.13393	3.80396e-06	2.8044e-05	1.54726
8072229	NM_021076	NEFH	neurofilament, heavy polypeptide	8.3446	8.72248	8.3761	8.70069	7.10107	6.93263	7.1361	6.78639	2.12402e-05	9.05839e-05	1.54692
8064894	NM_152611	LRRN4	leucine rich repeat neuronal 4	7.71396	7.87802	7.68946	7.66714	6.38421	6.03796	6.10581	6.2337	2.49937e-06	2.12554e-05	1.54672
8180376	NM_001353	AKR1C1	aldo-keto reductase family 1, member C1	6.72509	6.83448	7.13282	6.79317	5.1567	5.50605	5.32751	5.31269	1.04686e-05	5.54017e-05	1.54565
8015208	NM_001123387	KRTAP2-1	keratin associated protein 2-1	10.6074	10.3778	10.4637	10.316	9.09857	9.05568	8.84363	8.58641	2.47096e-05	0.00010062	1.54514
8012140	NM_015982	YBX2	Y box binding protein 2	9.16084	9.19333	9.36392	9.30155	7.77584	7.54089	7.84295	7.68928	1.30376e-06	1.45042e-05	1.54267
8161520	NR_002836	PGM5P2	phosphoglucomutase 5 pseudogene 2	7.73147	7.90293	7.83691	7.93503	6.10946	6.21882	6.55241	6.36181	6.55582e-06	4.0212e-05	1.54096
7996318	NM_144601	CMTM3	CKLF-like MARVEL transmembrane domain containing 3	10.1336	10.3336	10.0581	10.2468	8.65024	8.67387	8.66057	8.62548	2.71135e-07	5.67699e-06	1.5405
8117760	NM_001098479	HLA-F	major histocompatibility complex, class I, F	9.08296	8.99351	8.70794	8.97658	7.45666	7.23822	7.73251	7.17598	4.92219e-05	0.000166217	1.53941
8109999	NM_001031711	ERGIC1	endoplasmic reticulum-golgi intermediate compartment (ERGIC) 1	10.2436	10.3104	10.1278	10.2238	8.67732	8.51429	8.81636	8.74429	8.55197e-07	1.11356e-05	1.53835
8109773	NM_001161661	WWC1	WW and C2 domain containing 1	9.28272	9.52125	9.19526	9.59699	7.71755	7.98632	7.91132	7.83163	8.99514e-06	4.97173e-05	1.53735
7929388	NM_016341	PLCE1	phospholipase C, epsilon 1	8.75438	9.01907	8.72835	9.09908	7.29567	7.36348	7.34512	7.45276	4.51071e-06	3.15155e-05	1.53597
8031857	NM_003436	ZNF135	zinc finger protein 135	7.68187	7.91333	7.6547	8.0137	6.45714	6.42606	6.10297	6.13528	2.06309e-05	8.88195e-05	1.53554
8036689	NM_178820	FBXO27	F-box protein 27	9.16705	9.19284	9.09065	9.21052	7.53967	7.73906	7.83529	7.40886	4.77755e-06	3.26408e-05	1.53455
8059376	NM_001136529	NA	NA	9.25938	9.60367	9.19756	9.61668	7.96412	7.79414	7.78699	7.99767	1.70463e-05	7.76553e-05	1.53359
7943398	NM_001130145	YAP1	Yes-associated protein 1	10.511	10.6419	10.4424	10.6541	8.99307	8.88006	9.09443	9.15369	1.22688e-06	1.40221e-05	1.53205
7955694	NM_002178	IGFBP6	insulin-like growth factor binding protein 6	9.2596	8.82706	9.08159	8.78592	7.54335	7.58693	7.22951	7.47706	3.10295e-05	0.000118421	1.52933
7903393	NM_001400	S1PR1	sphingosine-1-phosphate receptor 1	6.9863	7.19577	6.80601	7.13314	5.96174	5.25223	5.35399	5.4363	0.000146962	0.000375682	1.52924
8042468	NM_001153	ANXA4	annexin A4	8.79854	8.96437	8.79334	8.92347	7.43477	7.27831	7.30653	7.34381	1.47619e-07	3.93755e-06	1.52908
8079966	NM_004636	SEMA3B	sema domain, immunoglobulin domain (Ig), short basic domain, secreted, (semaphorin) 3B	7.57183	7.34304	7.33158	7.30789	5.7717	6.07912	5.93259	5.65713	9.08877e-06	5.01044e-05	1.52845
8180270	NM_031859	PCDHA10	protocadherin alpha 10	8.76217	9.28232	8.58477	8.88778	7.54218	6.92885	7.4859	7.45051	0.00030378	0.000666072	1.5274
7997139	NM_001740	CALB2	calbindin 2	7.40704	7.60827	7.56176	7.4815	6.14554	6.09699	5.91781	5.79154	3.26427e-06	2.53485e-05	1.52668
7930139	NM_030912	TRIM8	tripartite motif containing 8	9.32536	9.76853	9.36478	9.76151	7.95252	7.9779	7.99708	8.19429	2.70681e-05	0.000107514	1.5246
7928369	NM_004922	SEC24C	SEC24 family, member C (S. cerevisiae)	9.06982	8.95554	9.08177	8.88735	7.56179	7.29127	7.51797	7.53238	1.15303e-06	1.35361e-05	1.52277
7948612	NM_013402	FADS1	fatty acid desaturase 1	11.2411	11.3237	11.296	11.2543	9.78553	9.80655	9.68941	9.74329	5.88165e-09	6.6525e-07	1.52258
8024111	NM_004368	CNN2	calponin 2	8.83465	9.02693	8.82033	8.85821	7.58506	7.1651	7.23315	7.4666	8.57906e-06	4.80507e-05	1.52255
8178399	NM_007243	NRM	nurim (nuclear envelope membrane protein)	8.14327	8.63744	8.28007	8.42641	6.75586	6.71499	6.87584	7.05471	2.38237e-05	9.80839e-05	1.52145
8179683	NM_007243	NRM	nurim (nuclear envelope membrane protein)	8.14327	8.63744	8.28007	8.42641	6.75586	6.71499	6.87584	7.05471	2.38237e-05	9.80839e-05	1.52145
7941179	NM_005186	CAPN1	calpain 1, (mu/I) large subunit	9.27746	9.30194	9.04078	9.2346	7.62064	7.44005	7.90665	7.80565	1.40671e-05	6.79274e-05	1.52045
8010454	NM_020914	RNF213	ring finger protein 213	8.83462	8.96532	8.81917	8.98562	7.43606	7.1311	7.49823	7.45929	3.72968e-06	2.76695e-05	1.52001
8063386	NM_005194	CEBPB	CCAAT/enhancer binding protein (C/EBP), beta	10.1848	10.3834	9.91667	10.3442	8.71299	8.7387	8.61068	8.68766	8.71672e-06	4.85907e-05	1.51977
8018482	NM_012478	WBP2	WW domain binding protein 2	9.52491	9.58027	9.40878	9.62375	8.10605	7.78238	7.95174	8.2238	7.42044e-06	4.38111e-05	1.51844
8097256	NM_002006	FGF2	fibroblast growth factor 2 (basic)	9.84514	10.2434	10.0325	10.254	8.47529	8.62232	8.74489	8.46289	1.36254e-05	6.66387e-05	1.5174
7967117	NM_003733	OASL	2'-5'-oligoadenylate synthetase-like	7.85397	7.94864	7.66974	7.67102	6.45262	6.0995	6.16093	6.36398	8.30521e-06	4.70249e-05	1.51659
7990818	NM_001114735	BCL2A1	BCL2-related protein A1	6.30698	6.33259	6.55853	6.24108	5.09728	4.64228	4.66738	4.97018	2.62132e-05	0.000105008	1.51552
8007446	NM_005533	IFI35	interferon-induced protein 35	7.57708	7.40123	7.52113	7.40231	5.99239	5.91643	6.18264	5.75066	5.16927e-06	3.43925e-05	1.51491
7990545	NM_001897	CSPG4	chondroitin sulfate proteoglycan 4	6.98401	7.16952	6.68985	7.05449	5.38647	5.36301	5.71817	5.3712	2.84565e-05	0.000111356	1.51476
7927202	NM_006963	ZNF22	zinc finger protein 22	8.034	8.10695	8.13197	8.16809	6.64866	6.71922	6.36407	6.6545	1.88819e-06	1.8078e-05	1.51364
8054254	NM_002285	AFF3	AF4/FMR2 family, member 3	7.88151	8.06382	7.7053	8.00278	6.48086	6.46709	6.37224	6.28126	3.15403e-06	2.46997e-05	1.51299
8055702	NM_004688	NMI	N-myc (and STAT) interactor	5.98503	6.79743	5.83367	6.88963	4.76642	5.04432	4.70226	4.94644	0.00176997	0.00274366	1.51158
8165438	NM_013379	DPP7	dipeptidyl-peptidase 7	9.87447	9.87227	9.71944	9.79134	8.62526	8.38887	8.07087	8.13365	2.7251e-05	0.00010807	1.50972
8036473	NM_033256	PPP1R14A	protein phosphatase 1, regulatory (inhibitor) subunit 14A	9.54647	9.16931	9.25041	9.25846	7.65683	7.87735	7.93714	7.71587	7.39644e-06	4.37526e-05	1.50936
7993478	NM_004996	ABCC1	ATP-binding cassette, sub-family C (CFTR/MRP), member 1	9.47457	9.68298	9.47688	9.64433	8.10717	7.88386	8.09633	8.16152	1.68402e-06	1.6893e-05	1.50747
8123080	NM_001009991	SYTL3	synaptotagmin-like 3	7.14386	6.99736	7.26518	6.9703	5.40213	5.73284	5.77914	5.4362	1.52938e-05	7.20261e-05	1.5066
8144917	NM_000237	LPL	lipoprotein lipase	7.59988	7.8148	7.88312	7.97513	6.11502	6.38371	6.29965	6.45783	8.87839e-06	4.92632e-05	1.50418
8133176	NM_014504	RABGEF1	RAB guanine nucleotide exchange factor (GEF) 1	9.40388	9.51554	9.54606	9.40753	7.7666	7.94729	8.06513	8.08139	1.6175e-06	1.65588e-05	1.50315
7949746	NM_021173	POLD4	polymerase (DNA-directed), delta 4, accessory subunit	9.41214	9.3054	9.29199	9.22607	7.73423	7.81861	7.83091	7.84675	5.50744e-08	2.16301e-06	1.50127
8070194	NM_001001890	RUNX1	runt-related transcription factor 1	9.89597	9.92089	9.87387	10.0029	8.57167	8.34541	8.50015	8.28079	8.62934e-07	1.11395e-05	1.4989
8105681	NM_018695	ERBB2IP	erbb2 interacting protein	11.7662	11.969	11.7422	12.0806	10.236	10.4612	10.4769	10.3923	5.06176e-06	3.37638e-05	1.4979
8091009	NM_006219	PIK3CB	phosphatidylinositol-4,5-bisphosphate 3-kinase, catalytic subunit beta	9.75087	9.97148	9.88573	9.94809	8.19371	8.16352	8.45039	8.76301	5.38712e-05	0.000177885	1.49639
8045336	NM_001508	GPR39	G protein-coupled receptor 39	8.1928	8.35048	8.18553	8.04814	6.96543	6.63867	6.9939	6.1969	0.000262024	0.000591736	1.49551
7900159	NM_003462	DNALI1	dynein, axonemal, light intermediate chain 1	7.92896	8.28751	8.09226	8.32934	6.9602	6.46854	6.7035	6.52803	4.68822e-05	0.000160703	1.49445
7920128	NM_005620	S100A11	S100 calcium binding protein A11	11.99	12.1722	11.9391	12.2133	10.5887	10.4588	10.5943	10.6957	1.87725e-06	1.80357e-05	1.49429
7924526	NM_005426	TP53BP2	tumor protein p53 binding protein, 2	10.3789	10.4046	10.457	10.46	8.8643	8.7745	9.0378	9.04721	6.84346e-07	9.7467e-06	1.49415
7966135	NM_014325	CORO1C	coronin, actin binding protein, 1C	12.8647	12.949	12.9344	12.8768	11.3449	11.352	11.4849	11.4726	3.85653e-08	1.74634e-06	1.49261
7911229	NM_001001957	OR2W3	olfactory receptor, family 2, subfamily W, member 3	7.56501	7.60258	7.6634	7.70949	6.59003	6.12708	5.94001	5.92122	8.31525e-05	0.000246444	1.49054
7911231	NM_001001957	OR2W3	olfactory receptor, family 2, subfamily W, member 3	7.56501	7.60258	7.6634	7.70949	6.59003	6.12708	5.94001	5.92122	8.31525e-05	0.000246444	1.49054
8150592	NM_005195	CEBPD	CCAAT/enhancer binding protein (C/EBP), delta	9.07472	9.23744	9.0431	9.18901	7.77655	7.73826	7.7918	7.28978	2.54258e-05	0.000102722	1.48697
8061564	NM_181353	ID1	inhibitor of DNA binding 1, dominant negative helix-loop-helix protein	8.69093	8.54025	8.82548	8.35904	7.17441	7.00141	7.13909	7.15632	9.04662e-06	4.995e-05	1.48611
8125436	NM_002125	HLA-DRB5	major histocompatibility complex, class II, DR beta 5	7.5428	7.48252	7.58708	7.48143	6.07902	6.04543	6.03374	5.994	5.57257e-09	6.50995e-07	1.48541
8143270	NM_080660	ZC3HAV1L	zinc finger CCCH-type, antiviral 1-like	8.50454	8.78624	8.48024	8.68436	7.0534	6.89904	7.27457	7.28841	1.61189e-05	7.47708e-05	1.48499
7960518	NM_001065	TNFRSF1A	tumor necrosis factor receptor superfamily, member 1A	9.50152	9.58602	9.47366	9.6775	8.08789	7.94167	8.11602	8.15433	4.76972e-07	7.68883e-06	1.4847
7943715	NM_033390	ZC3H12C	zinc finger CCCH-type containing 12C	8.70646	8.92716	8.90316	8.65861	7.20894	7.23558	7.38105	7.4446	2.92633e-06	2.3601e-05	1.48131
7963911	NM_001780	CD63	CD63 molecule	10.7521	10.3506	10.8468	10.361	9.13575	9.18418	9.11828	8.94981	4.07448e-05	0.000144757	1.48063
7994609	NM_014298	QPRT	quinolinate phosphoribosyltransferase	10.2041	10.2633	10.1638	10.1557	8.8708	8.77712	8.62047	8.59878	6.94058e-07	9.84419e-06	1.47993
8023401	NM_025214	CCDC68	coiled-coil domain containing 68	5.37076	5.96347	5.35636	6.29661	4.0333	4.58722	4.1664	4.28957	0.001278	0.00211162	1.47768
7917779	NM_002061	GCLM	glutamate-cysteine ligase, modifier subunit	7.7296	8.01723	8.13043	7.98257	6.22971	6.37179	6.6465	6.70964	4.55923e-05	0.0001577	1.47555
8136293	NM_021807	EXOC4	exocyst complex component 4	9.68062	9.83607	9.80388	9.82547	8.2955	8.41491	8.31483	8.23288	1.30384e-07	3.65956e-06	1.47198
8157582	NM_000177	GSN	gelsolin	8.92213	8.8489	8.84395	8.70431	7.39467	7.18391	7.42973	7.42716	1.08558e-06	1.30034e-05	1.47095
8115516	NM_178424	SOX30	SRY (sex determining region Y)-box 30	7.56125	7.95259	7.65209	7.73156	6.29764	6.36134	6.10416	6.25706	6.21988e-06	3.88182e-05	1.46933
7991904	NM_004204	PIGQ	phosphatidylinositol glycan anchor biosynthesis, class Q	8.12125	8.33265	7.95912	8.31179	6.7643	6.67237	6.56421	6.84749	9.2844e-06	5.08799e-05	1.46911
7987315	NM_005159	ACTC1	actin, alpha, cardiac muscle 1	6.60321	6.78894	6.58553	6.8874	5.15574	5.29946	5.20359	5.33306	2.25915e-06	1.99454e-05	1.46831
8167965	NM_002444	MSN	moesin	11.241	11.246	11.2796	11.2243	9.83868	9.5215	9.8817	9.87631	2.827e-06	2.30582e-05	1.46819
8015387	NM_000422	KRT17	keratin 17	9.18347	8.99087	8.97695	8.8662	7.74716	7.80716	7.47407	7.12286	0.000131338	0.000346612	1.46656
8004081	NM_153018	ZFP3	ZFP3 zinc finger protein	6.4065	6.99865	6.14632	6.94517	5.15971	5.36577	5.13261	4.97926	0.000591354	0.00112975	1.46482
8102619	NM_001154	ANXA5	annexin A5	13.0399	13.0261	12.9885	12.9884	11.5505	11.402	11.6216	11.6182	1.50055e-07	3.97708e-06	1.46263
8006779	NM_020876	NA	NA	8.31892	8.55433	8.12666	8.06808	6.8415	6.55513	6.87471	6.94904	4.45152e-05	0.000154884	1.4619
7984588	NM_024817	THSD4	thrombospondin, type I, domain containing 4	8.29819	8.28979	8.23138	8.19183	6.84735	6.91803	6.76223	6.64667	4.49452e-07	7.39231e-06	1.45923
8041048	NM_005253	FOSL2	FOS-like antigen 2	9.21682	9.29614	9.23168	9.28953	7.84431	7.61492	7.88077	7.85833	5.20165e-07	8.10155e-06	1.45896
7912706	NM_004431	EPHA2	EPH receptor A2	8.97232	9.11449	9.0209	9.10655	7.61494	7.72797	7.56935	7.46721	4.7007e-07	7.60595e-06	1.4587
7912257	NM_001009566	CLSTN1	calsyntenin 1	8.89347	8.89176	8.9845	9.04827	7.50581	7.22584	7.5962	7.65985	7.78077e-06	4.5103e-05	1.45757
8043363	NR_024204	LINC00152	long intergenic non-protein coding RNA 152	11.38	11.3518	11.3777	11.3803	10.0809	10.156	9.56233	9.86494	3.47969e-05	0.000128012	1.4564
7977046	NM_006291	TNFAIP2	tumor necrosis factor, alpha-induced protein 2	7.87516	7.91732	7.88808	7.92741	6.32948	6.53687	6.63402	6.28206	2.45783e-06	2.11239e-05	1.45638
7978208	NM_012461	TINF2	TERF1 (TRF1)-interacting nuclear factor 2	9.48745	9.28819	9.34205	9.1763	7.84973	7.67884	7.93017	8.01195	5.22088e-06	3.45535e-05	1.45582
8002523	NM_018348	FTSJD1	FtsJ methyltransferase domain containing 1	8.15796	8.2969	8.28006	8.3067	6.98972	7.05233	6.51141	6.66746	3.57845e-05	0.000130755	1.45518
8082400	NM_207335	KBTBD12	kelch repeat and BTB (POZ) domain containing 12	6.30268	6.41173	6.00795	6.20538	4.53387	4.85418	5.07785	4.64338	6.30842e-05	0.000200001	1.45462
7973564	NM_176783	PSME1	proteasome (prosome, macropain) activator subunit 1 (PA28 alpha)	9.80111	9.85009	9.76578	9.82143	8.24755	8.41277	8.49608	8.26613	4.02759e-07	6.93552e-06	1.45397
7975203	NM_022474	MPP5	membrane protein, palmitoylated 5 (MAGUK p55 subfamily member 5)	8.72718	9.14755	8.96316	9.11397	7.35154	7.49693	7.53745	7.75101	2.59638e-05	0.000104375	1.45374
8072710	NM_030641	APOL6	apolipoprotein L, 6	6.56757	6.90041	6.33126	6.92993	5.34318	5.10801	5.33511	5.14901	8.69936e-05	0.000254684	1.44847
7950042	NM_012309	SHANK2	SH3 and multiple ankyrin repeat domains 2	7.94739	8.05319	7.8587	7.92418	6.41972	6.54863	6.49462	6.52686	1.02621e-07	3.23607e-06	1.44841
7999319	NM_014316	CARHSP1	calcium regulated heat stable protein 1, 24kDa	9.89602	9.8702	9.88846	9.79475	8.51085	8.60681	8.3058	8.23604	3.58149e-06	2.71526e-05	1.44748
8145281	NM_016612	SLC25A37	solute carrier family 25 (mitochondrial iron transporter), member 37	10.4896	10.4328	10.4128	10.3718	9.00488	8.83139	9.04388	9.03768	2.15744e-07	4.95773e-06	1.44729
8116998	NM_004973	JARID2	jumonji, AT rich interactive domain 2	9.46634	9.67376	9.40121	9.58773	8.05487	7.93277	8.29012	8.06491	5.46784e-06	3.55457e-05	1.44659
8035819	NM_007153	ZNF208	zinc finger protein 208	5.35972	6.20573	5.40955	6.47813	4.46985	4.29906	4.35944	4.5396	0.00236655	0.00348031	1.4463
8077441	NM_003670	BHLHE40	basic helix-loop-helix family, member e40	11.3654	11.4597	11.4371	11.4196	10.0143	9.75379	10.0612	10.0734	1.56037e-06	1.62959e-05	1.44478
8106986	NM_014899	RHOBTB3	Rho-related BTB domain containing 3	10.3517	10.5914	10.3567	10.6922	8.90645	8.85099	9.15693	9.3012	4.14048e-05	0.00014654	1.44409
7963187	NM_001113546	LIMA1	LIM domain and actin binding 1	10.5825	10.7197	10.6143	10.6947	9.15049	9.24692	9.1195	9.31952	2.26422e-07	5.03354e-06	1.44368
8129560	NM_198495	CTAGE4	CTAGE family, member 4	5.26859	5.91957	5.58387	6.1905	4.18284	4.42963	4.38812	4.18853	0.000475485	0.000948084	1.44335
8078729	NM_001172567	MYD88	myeloid differentiation primary response 88	8.58977	8.75864	8.64111	8.541	7.17129	7.38055	7.18324	7.02481	3.00333e-06	2.39537e-05	1.44266
8137865	NM_007353	GNA12	guanine nucleotide binding protein (G protein) alpha 12	9.36678	9.41362	9.42263	9.32441	8.03988	7.54977	8.06767	8.10312	3.60544e-05	0.000131518	1.44175
8153819	NM_138496	CYHR1	cysteine/histidine-rich 1	7.54283	7.79125	7.6499	7.50851	6.45018	6.20343	6.10742	5.98362	1.82337e-05	8.14892e-05	1.43696
8148333	NM_015137	EFR3A	EFR3 homolog A (S. cerevisiae)	9.931	10.2517	9.92359	10.2544	8.31052	8.68638	8.85547	8.76086	7.96909e-05	0.000238475	1.43686
7953981	NM_001987	ETV6	ets variant 6	8.3947	9.03552	8.56476	8.92346	7.11363	7.33846	7.36693	7.36387	0.000115914	0.000315148	1.43389
8054467	NM_144710	2014-09-10	septin 10	10.6475	10.884	10.6538	10.9466	9.31065	9.36065	9.40161	9.32625	1.95236e-06	1.84833e-05	1.43322
8022251	NM_001042388	PPP4R1	protein phosphatase 4, regulatory subunit 1	9.90081	10.1004	10.022	10.1138	8.53128	8.62061	8.63674	8.62228	2.00537e-07	4.7602e-06	1.43152
8026139	NM_002501	NFIX	nuclear factor I/X (CCAAT-binding transcription factor)	8.32657	8.57779	8.47692	8.51559	6.67143	7.41014	7.16117	6.92837	0.000137941	0.000358778	1.43144
8124901	NM_002117	HLA-C	major histocompatibility complex, class I, C	12.2622	12.2069	12.1973	12.3026	10.7473	10.856	10.914	10.7355	1.17847e-07	3.46582e-06	1.42904
7950162	NM_002599	PDE2A	phosphodiesterase 2A, cGMP-stimulated	7.54237	7.79042	7.64873	7.7216	6.45209	6.20904	6.32226	6.01439	1.09393e-05	5.69655e-05	1.42634
8056151	NM_007366	PLA2R1	phospholipase A2 receptor 1, 180kDa	6.60359	7.41551	6.6172	7.06163	5.49333	5.68484	5.42619	5.39204	0.000449471	0.000905407	1.42539
7952116	NM_182557	BCL9L	B-cell CLL/lymphoma 9-like	7.9657	8.25799	7.93291	8.43082	6.75369	6.80437	6.92895	6.39974	0.000131916	0.000347854	1.42517
8054611	NR_024204	LINC00152	long intergenic non-protein coding RNA 152	11.7086	11.6756	11.7213	11.7294	10.4197	10.6275	9.91368	10.1772	9.20994e-05	0.000265612	1.42421
8016847	NM_005082	TRIM25	tripartite motif containing 25	9.503	9.6213	9.64119	9.65255	8.10494	8.18179	8.14273	8.29858	2.02905e-07	4.79573e-06	1.4225
7928558	NM_020338	ZMIZ1	zinc finger, MIZ-type containing 1	7.99105	8.43759	8.26992	8.48424	7.03045	6.51876	6.93427	7.01109	0.000129233	0.000342241	1.42206
7937275	NM_021932	RIC8A	resistance to inhibitors of cholinesterase 8 homolog A (C. elegans)	9.96464	9.9124	9.90583	9.79402	8.52964	8.26028	8.57027	8.54573	2.22201e-06	1.98027e-05	1.41774
8014063	NM_006495	EVI2B	ecotropic viral integration site 2B	5.72171	6.03205	5.68832	6.20476	4.37321	4.38194	4.71518	4.51088	7.4247e-05	0.000226313	1.41641
7958600	NM_033121	ANKRD13A	ankyrin repeat domain 13A	10.6784	10.8385	10.7891	10.8975	9.36825	9.39378	9.36798	9.41026	9.57975e-08	3.10397e-06	1.4158
8156770	NM_024642	GALNT12	UDP-N-acetyl-alpha-D-galactosamine:polypeptide N-acetylgalactosaminyltransferase 12 (GalNAc-T12)	8.81192	9.0448	8.95411	9.04322	7.55128	7.58341	7.41099	7.64791	1.34256e-06	1.47836e-05	1.41511
8009075	NM_025185	TANC2	tetratricopeptide repeat, ankyrin repeat and coiled-coil containing 2	8.83271	8.74855	8.68825	8.78234	7.31544	7.20788	7.39252	7.47681	5.99698e-07	8.99762e-06	1.4148
8002152	NM_005072	SLC12A4	solute carrier family 12 (potassium/chloride transporters), member 4	8.47818	8.61727	8.43354	8.65819	7.15809	7.01517	7.30743	7.05097	2.99974e-06	2.39398e-05	1.41388
8150318	NM_023110	FGFR1	fibroblast growth factor receptor 1	9.33063	9.52001	9.42877	9.52969	8.01072	7.87008	8.08546	8.19149	2.44698e-06	2.10669e-05	1.41283
7969204	NM_052950	WDFY2	WD repeat and FYVE domain containing 2	8.7173	8.73333	8.64957	8.65209	7.29679	7.05704	7.38255	7.37009	1.92739e-06	1.83542e-05	1.41145
7963670	NM_006301	MAP3K12	mitogen-activated protein kinase kinase kinase 12	7.82985	7.88293	7.79444	7.93652	6.69988	6.01062	6.51664	6.57338	9.72915e-05	0.000276372	1.4108
8153223	NM_153831	PTK2	protein tyrosine kinase 2	10.7308	10.7973	10.8086	10.7871	9.33314	9.37014	9.34679	9.43189	3.9748e-09	5.92133e-07	1.41047
8110265	NM_213647	FGFR4	fibroblast growth factor receptor 4	8.06515	8.2985	8.04029	8.18494	6.66808	6.87085	6.78079	6.64066	2.12646e-06	1.93749e-05	1.40712
7925929	NM_003739	AKR1C3	aldo-keto reductase family 1, member C3	6.20708	6.18523	6.66919	6.20469	4.72862	5.10483	4.94578	4.86054	6.02093e-05	0.000193394	1.40661
8092707	NM_018192	LEPREL1	leprecan-like 1	7.30311	7.53259	7.32428	7.63702	5.80519	6.21853	6.10165	6.05992	2.26121e-05	9.46898e-05	1.40292
8089801	NM_002093	GSK3B	glycogen synthase kinase 3 beta	10.2923	10.3866	10.227	10.4555	8.87788	8.75859	9.04987	9.06551	4.15189e-06	2.97297e-05	1.40239
8102988	NM_198682	GYPE	glycophorin E (MNS blood group)	6.60396	6.86003	6.77091	6.91376	5.58451	5.32306	5.15264	5.47919	1.95252e-05	8.56369e-05	1.40231
8178489	NM_002117	HLA-C	major histocompatibility complex, class I, C	12.2481	12.2155	12.1983	12.324	10.8396	10.8689	10.9371	10.7315	1.53838e-07	4.04427e-06	1.40217
8028286	NM_015073	SIPA1L3	signal-induced proliferation-associated 1 like 3	8.57746	8.96314	8.56452	8.83484	7.10614	7.24378	7.42632	7.55958	5.779e-05	0.000187623	1.40104
8035773	NM_001099269	ZNF506	zinc finger protein 506	7.93037	8.42833	8.06951	8.457	6.70166	6.69985	6.82676	7.05672	0.000105497	0.000293475	1.40005
8172520	NM_006521	TFE3	transcription factor binding to IGHM enhancer 3	9.39827	9.37752	9.24518	9.41182	7.99319	7.68344	8.07162	8.08887	9.21565e-06	5.06127e-05	1.39892
8067113	NM_006526	ZNF217	zinc finger protein 217	8.91397	9.26082	9.08201	9.3314	7.69053	7.49	7.81228	8.00111	6.43414e-05	0.000203142	1.39857
8114536	NM_198282	TMEM173	transmembrane protein 173	8.34195	8.30604	8.47692	8.19681	6.97649	6.80085	7.02771	6.93206	1.60964e-06	1.65308e-05	1.39616
8082869	NM_002718	PPP2R3A	protein phosphatase 2, regulatory subunit B'', alpha	8.42589	8.64992	8.66296	8.82754	7.39044	7.02388	7.31138	7.2577	1.81764e-05	8.13453e-05	1.39573
8067652	NM_001958	EEF1A2	eukaryotic translation elongation factor 1 alpha 2	10.2703	10.3331	10.2141	10.1356	8.79426	8.74158	8.95716	8.87933	5.72721e-07	8.73136e-06	1.39518
8059650	NM_080424	SP110	SP110 nuclear body protein	6.35597	6.72166	6.59085	6.58448	5.23644	5.58009	5.22575	4.63042	0.00058154	0.00111474	1.39507
8038967	NM_001105549	ZNF83	zinc finger protein 83	7.09193	7.64193	7.30982	7.61398	5.8375	5.96307	6.03197	6.24645	0.000111923	0.000306483	1.39467
8161056	NM_006289	TLN1	talin 1	9.65332	9.73317	9.64679	9.79885	8.37999	8.23756	8.399	8.24707	2.76209e-07	5.72771e-06	1.39213
7970347	NM_001078645	CDC16	cell division cycle 16	9.14534	9.44289	9.2351	9.40954	7.88289	7.8683	7.8342	8.08246	4.75424e-06	3.2533e-05	1.39125
8129937	NM_006079	CITED2	Cbp/p300-interacting transactivator, with Glu/Asp-rich carboxy-terminal domain, 2	11.221	11.218	11.2263	11.1836	9.71153	9.90464	9.79185	9.87642	7.35648e-08	2.60503e-06	1.39112
7925511	NM_152666	PLD5	phospholipase D family, member 5	7.6346	8.08366	7.84617	7.96968	6.53771	6.77905	6.04112	6.61503	0.00029325	0.000647585	1.3903
8088550	NM_198859	PRICKLE2	prickle homolog 2 (Drosophila)	6.93937	7.35729	7.23768	7.32785	5.85485	5.87331	5.65582	5.92186	1.68241e-05	7.69976e-05	1.38909
8064637	NM_001009984	C20orf194	chromosome 20 open reading frame 194	8.59825	8.97049	8.6763	8.96416	7.55564	7.31084	7.43398	7.35925	1.54893e-05	7.26301e-05	1.38737
7917433	NM_020729	ODF2L	outer dense fiber of sperm tails 2-like	9.47192	9.77737	9.4552	9.83479	8.06902	8.24297	8.3134	8.36572	2.37743e-05	9.79427e-05	1.38704
8124806	NM_007243	NRM	nurim (nuclear envelope membrane protein)	8.02745	8.46944	8.2553	8.28398	6.69216	6.80063	6.84359	7.15339	4.79573e-05	0.000163137	1.3866
7958749	NM_005475	SH2B3	SH2B adaptor protein 3	8.87455	8.8093	8.77274	8.9258	7.50423	7.46769	7.47136	7.39719	4.35012e-08	1.84248e-06	1.38548
8175039	NM_001421	ELF4	E74-like factor 4 (ets domain transcription factor)	7.79708	8.21414	7.88725	8.11829	6.70498	6.47471	6.6365	6.66193	1.50313e-05	7.11519e-05	1.38466
7995206	NM_001042454	TGFB1I1	transforming growth factor beta 1 induced transcript 1	8.59853	8.55489	8.7214	8.63869	7.29004	7.38652	7.20268	7.10584	1.06486e-06	1.28502e-05	1.38211
7939642	NM_052854	CREB3L1	cAMP responsive element binding protein 3-like 1	7.75712	8.19722	7.8124	8.15964	6.82181	6.52287	6.64951	6.40827	7.58117e-05	0.000229463	1.38098
8103630	NM_020870	SH3RF1	SH3 domain containing ring finger 1	8.95342	9.03496	8.89571	9.06483	7.44809	7.6657	7.65711	7.65485	7.35387e-07	1.01173e-05	1.38079
7933209	NM_001039380	C10orf25	chromosome 10 open reading frame 25	6.49918	6.87675	6.88818	6.64041	5.51788	5.24447	5.40031	5.21986	2.32867e-05	9.63936e-05	1.3805
8005689	NR_003554	USP32P2	ubiquitin specific peptidase 32 pseudogene 2	8.82525	9.1575	8.55094	9.38372	7.6388	7.65251	7.62583	7.4837	0.000321438	0.000695727	1.37914
7973618	NM_006084	IRF9	interferon regulatory factor 9	8.02979	8.23686	7.97301	8.0823	6.28392	7.0032	6.71104	6.80849	0.000144807	0.000371492	1.37883
8084742	NM_005578	LPP	LIM domain containing preferred translocation partner in lipoma	9.51874	9.83392	9.54235	9.80329	8.26268	8.01367	8.43001	8.48198	5.05478e-05	0.000169502	1.37749
8040113	NM_003887	ASAP2	ArfGAP with SH3 domain, ankyrin repeat and PH domain 2	8.35074	8.73368	8.42593	8.80822	7.05318	7.30088	7.21605	7.23877	3.21939e-05	0.000121435	1.37742
8160138	NM_005596	NFIB	nuclear factor I/B	8.9905	9.39329	8.93295	9.45931	7.78387	7.36858	8.01802	8.10115	0.000647456	0.00121582	1.37611
7941111	NM_013306	SNX15	sorting nexin 15	8.46226	8.63568	8.71187	8.52304	7.2348	7.27886	7.15261	7.16292	6.31085e-07	9.26297e-06	1.37591
8122365	NM_020455	GPR126	G protein-coupled receptor 126	9.12589	9.26428	9.22838	9.21912	7.77111	7.85367	7.86703	7.84237	2.30778e-08	1.30612e-06	1.37587
8115584	NM_024565	CCNJL	cyclin J-like	8.3107	8.34983	8.36485	8.35491	7.05881	6.9923	7.09756	6.74359	2.59091e-06	2.17767e-05	1.37201
8039025	NR_003578	ZNF702P	zinc finger protein 702, pseudogene	5.71693	5.88251	5.45013	5.78143	4.39844	4.36064	4.21746	4.36693	9.76954e-06	5.27357e-05	1.37188
8164217	NM_022833	FAM129B	family with sequence similarity 129, member B	8.92158	8.79804	8.90965	8.77699	7.39904	7.48718	7.53287	7.50011	1.07215e-07	3.31638e-06	1.37177
8116910	NM_002114	HIVEP1	human immunodeficiency virus type I enhancer binding protein 1	9.955	10.3962	10.0475	10.4449	8.81836	8.65988	8.95402	8.92739	6.4958e-05	0.00020464	1.371
8110478	NM_182594	ZNF454	zinc finger protein 454	6.0037	6.8484	6.15155	6.74953	5.25645	5.10446	5.05666	4.8518	0.00093792	0.00163849	1.37095
7901054	NM_004073	PLK3	polo-like kinase 3	8.18078	8.20087	8.06376	8.10522	7.04164	6.60471	6.75183	6.66888	1.0301e-05	5.47114e-05	1.37089
8034084	NM_005498	AP1M2	adaptor-related protein complex 1, mu 2 subunit	7.52592	7.31467	7.81822	7.37062	6.32676	6.27763	6.2783	5.66441	0.000403432	0.0008318	1.37058
8104592	NM_012304	FBXL7	F-box and leucine-rich repeat protein 7	7.86207	7.70647	7.74925	7.85176	6.43011	6.48421	6.33144	6.44164	1.58119e-07	4.11461e-06	1.37054
7956759	NM_020762	SRGAP1	SLIT-ROBO Rho GTPase activating protein 1	8.14731	8.41973	8.26622	8.39787	6.75366	6.90184	7.01522	7.08006	7.20231e-06	4.30004e-05	1.37009
7928944	NM_004670	PAPSS2	3'-phosphoadenosine 5'-phosphosulfate synthase 2	10.0469	10.0722	10.1187	10.0083	8.77579	8.55182	8.77827	8.66032	4.11465e-07	7.00363e-06	1.37
8157153	NM_007203	PALM2-AKAP2	PALM2-AKAP2 readthrough	8.6418	8.75118	8.47487	8.97603	7.45388	7.20453	7.39034	7.31642	2.44949e-05	0.000100084	1.36968
8005132	NR_002211	MEIS3P1	Meis homeobox 3 pseudogene 1	7.95302	8.26061	8.1246	8.07011	7.08156	6.66252	6.46615	6.72069	7.52451e-05	0.000228602	1.36936
8094789	NM_014988	LIMCH1	LIM and calponin homology domains 1	7.56801	7.50327	7.57768	7.39462	6.14874	6.143	6.06717	6.22352	2.22299e-07	5.01679e-06	1.36529
8116316	NM_014275	MGAT4B	mannosyl (alpha-1,3-)-glycoprotein beta-1,4-N-acetylglucosaminyltransferase, isozyme B	9.26427	9.59384	9.23856	9.5025	8.04269	8.07312	8.07682	7.94718	6.24229e-06	3.88772e-05	1.36484
8124273	NM_030939	C6orf62	chromosome 6 open reading frame 62	10.2805	10.3619	10.3453	10.3537	8.91064	8.82514	9.16195	8.98651	1.64604e-06	1.67191e-05	1.36431
8027354	NR_003662	RPSAP58	ribosomal protein SA pseudogene 58	6.69746	6.71187	6.2234	7.10695	5.83402	5.64389	4.89778	4.9078	0.00416387	0.00556581	1.36405
8107632	NM_014035	SNX24	sorting nexin 24	8.27072	8.76408	8.45654	8.68951	7.30561	6.82042	7.26031	7.3401	0.000173284	0.00042819	1.3636
8141498	NM_017984	ZCWPW1	zinc finger, CW type with PWWP domain 1	6.36733	6.34934	6.39458	6.76541	5.40846	4.98042	4.89252	5.14459	0.000102358	0.000287333	1.36267
8077970	NM_001004019	FBLN2	fibulin 2	8.30927	8.11032	8.28774	7.915	6.91204	6.75291	6.74689	6.76056	9.69939e-06	5.24663e-05	1.36248
7964579	NM_005730	CTDSP2	CTD (carboxy-terminal domain, RNA polymerase II, polypeptide A) small phosphatase 2	10.3242	10.3397	10.2581	10.3223	8.95914	8.80494	8.95987	9.07669	4.17387e-07	7.04282e-06	1.36092
8155048	NM_014806	RUSC2	RUN and SH3 domain containing 2	8.71833	8.62497	8.67244	8.6817	7.35075	7.37346	7.12157	7.41001	1.01648e-06	1.23817e-05	1.36041
7972674	NM_138779	TEX30	testis expressed 30	8.12434	8.26482	8.21174	8.52548	7.02976	7.05545	6.66575	6.94223	3.45559e-05	0.000127379	1.3583
7989277	NM_004998	MYO1E	myosin IE	8.967	8.94188	8.98118	8.90143	7.53015	7.37412	7.6844	7.77251	5.1721e-06	3.43936e-05	1.35758
7982326	NM_015995	KLF13	Kruppel-like factor 13	8.15254	8.31629	8.2162	8.37627	6.83491	6.78115	6.99145	7.02707	2.27847e-06	2.00749e-05	1.35668
8016094	NM_005497	GJC1	gap junction protein, gamma 1, 45kDa	10.4275	10.5566	10.6065	10.5873	9.09354	9.02099	9.32443	9.31291	4.36703e-06	3.08947e-05	1.35649
8122807	NM_005100	AKAP12	A kinase (PRKA) anchor protein 12	9.78178	9.7467	9.77572	9.7463	8.36204	8.3211	8.47077	8.47107	4.00139e-08	1.76395e-06	1.35638
7940904	NM_003377	VEGFB	vascular endothelial growth factor B	8.63298	8.65132	8.57982	8.6326	7.24919	7.24569	7.46557	7.12216	1.58975e-06	1.64306e-05	1.35353
7992529	NM_032271	TRAF7	TNF receptor-associated factor 7, E3 ubiquitin protein ligase	9.00527	9.04397	8.8544	8.96117	7.49771	7.62968	7.61166	7.72017	5.71322e-07	8.72161e-06	1.3514
7933947	NM_022079	HERC4	HECT and RLD domain containing E3 ubiquitin protein ligase 4	8.91059	9.19508	8.89565	9.22229	7.7126	7.64453	7.63429	7.82965	9.74947e-06	5.26493e-05	1.35063
8136863	NM_153345	TMEM139	transmembrane protein 139	7.49561	7.2561	7.46632	7.34067	6.27168	6.087	5.91351	5.88506	1.38654e-05	6.7355e-05	1.35036
7972840	NM_006322	TUBGCP3	tubulin, gamma complex associated protein 3	9.19576	9.51323	9.27423	9.48485	7.83331	7.8989	8.26809	8.06802	3.67491e-05	0.000133547	1.34994
7972487	NM_015296	DOCK9	dedicator of cytokinesis 9	8.36844	8.78516	8.68122	8.79518	7.23533	7.14249	7.34789	7.50485	4.01654e-05	0.000143091	1.34986
7984124	NM_031301	APH1B	anterior pharynx defective 1 homolog B (C. elegans)	6.94889	7.05664	6.81445	7.41335	5.58467	5.67383	5.69626	5.88358	8.02579e-05	0.000239951	1.34875
8003357	NM_001142864	PIEZO1	piezo-type mechanosensitive ion channel component 1	8.72886	9.06983	8.7609	9.06522	7.57122	7.28336	7.77279	7.60536	6.62597e-05	0.000207731	1.34802
8094759	NM_024677	NSUN7	NOP2/Sun domain family, member 7	6.28165	6.75258	6.25998	6.79849	5.23312	5.11182	5.35431	5.00208	0.00017926	0.00043977	1.34784
7903321	NM_001130841	RTCA	RNA 3'-terminal phosphate cyclase	11.088	11.1292	11.1576	11.1973	9.69413	9.72769	9.8507	9.90821	3.21404e-07	6.21727e-06	1.34784
7986446	NM_000693	ALDH1A3	aldehyde dehydrogenase 1 family, member A3	8.24358	8.75034	8.44953	8.44829	7.09115	6.97493	7.15529	7.2795	3.30361e-05	0.000123569	1.34772
7917232	NM_005274	GNG5	guanine nucleotide binding protein (G protein), gamma 5	11.2321	11.3342	11.1782	11.2041	10.0384	9.81595	9.75772	9.94833	1.52101e-06	1.60269e-05	1.34704
8008321	NM_025149	ACSF2	acyl-CoA synthetase family member 2	8.63925	8.71705	8.63097	8.59279	7.40625	7.29035	7.18885	7.3075	2.08177e-07	4.85365e-06	1.34678
8014956	NM_021724	NR1D1	nuclear receptor subfamily 1, group D, member 1	8.26362	8.0444	8.30484	8.05834	6.73953	6.75304	6.87118	6.92664	3.19821e-06	2.49702e-05	1.3452
7914592	NM_033504	TMEM54	transmembrane protein 54	9.65073	9.55563	9.65536	9.56817	8.29252	8.07894	8.40938	8.26905	1.69868e-06	1.69802e-05	1.345
8126382	NM_001164446	C6orf132	chromosome 6 open reading frame 132	7.70292	8.1144	7.77947	8.06356	6.54604	6.64943	6.38515	6.7035	3.62546e-05	0.000132137	1.34406
8174767	NM_017938	TMEM255A	transmembrane protein 255A	9.43517	9.82194	9.41793	9.76025	8.24167	8.15953	8.30936	8.35181	2.26395e-05	9.47194e-05	1.34323
7978260	NM_001136050	DHRS1	dehydrogenase/reductase (SDR family) member 1	8.63157	8.5431	8.62109	8.6164	7.24947	7.177	7.28385	7.33959	4.40448e-08	1.85943e-06	1.34056
8028524	NM_004924	ACTN4	actinin, alpha 4	12.4266	12.4598	12.356	12.4046	11.1236	11.0119	11.0859	11.0668	1.21488e-08	9.05846e-07	1.33969
8028172	NM_001749	CAPNS1	calpain, small subunit 1	11.6538	11.4451	11.5229	11.4006	10.2508	9.90177	10.285	10.2269	1.40954e-05	6.80313e-05	1.3395
8014891	NM_012481	IKZF3	IKAROS family zinc finger 3 (Aiolos)	6.85964	7.11442	6.92012	6.84482	5.43974	5.61469	5.74768	5.57909	5.29547e-06	3.48387e-05	1.33945
7938528	NM_018222	PARVA	parvin, alpha	9.71547	10.1727	9.73927	10.1421	8.41921	8.72627	8.53714	8.72992	9.38517e-05	0.000269466	1.33927
8063607	NM_020673	RAB22A	RAB22A, member RAS oncogene family	9.58463	9.69377	9.79644	9.74639	8.28014	8.21552	8.49424	8.47808	3.75305e-06	2.77712e-05	1.33831
7993453	NM_001128423	MPV17L	MPV17 mitochondrial membrane protein-like	7.07903	7.4249	7.01369	6.92071	6.26943	5.59072	5.64609	5.58522	0.000532374	0.00103601	1.33672
7928019	NM_033500	HK1	hexokinase 1	9.07728	8.93557	9.12114	8.83825	7.76569	7.42966	7.6432	7.78925	1.43385e-05	6.88532e-05	1.33611
7928395	NM_173540	FUT11	fucosyltransferase 11 (alpha (1,3) fucosyltransferase)	9.52295	9.64777	9.49391	9.52863	8.28922	8.13733	8.25811	8.16557	1.76323e-07	4.33632e-06	1.33576
7905028	NM_002339	LSP1	lymphocyte-specific protein 1	10.5235	10.5753	10.4656	10.5072	9.25845	8.98875	9.24096	9.24443	1.21062e-06	1.39436e-05	1.33473
8047161	NM_001031716	NABP1	nucleic acid binding protein 1	10.0715	10.2557	10.1538	10.2981	8.80506	8.80038	8.87338	8.96633	8.03247e-07	1.06775e-05	1.33348
8072360	NM_000355	TCN2	transcobalamin II	7.03128	7.03059	6.8153	7.05255	5.6476	5.86304	5.73068	5.35624	3.32934e-05	0.000124209	1.33304
7986532	NM_001001674	OR4F15	olfactory receptor, family 4, subfamily F, member 15	5.88651	6.09791	6.30601	5.96757	4.56818	4.89015	4.80824	4.66305	2.68771e-05	0.000106886	1.3321
7940924	NM_000932	PLCB3	phospholipase C, beta 3 (phosphatidylinositol-specific)	8.12439	8.13801	8.17036	8.05257	6.73364	6.65027	6.86383	6.91204	8.68454e-07	1.11604e-05	1.33139
8094778	NM_004181	UCHL1	ubiquitin carboxyl-terminal esterase L1 (ubiquitin thiolesterase)	11.6118	11.5655	11.5896	11.5283	10.1873	10.1409	10.2908	10.3516	2.12899e-07	4.9273e-06	1.33117
8001587	NM_005550	KIFC3	kinesin family member C3	8.67741	8.50962	8.50547	8.49262	7.13861	7.20916	7.35265	7.16096	8.88524e-07	1.13344e-05	1.33094
8104746	NM_000908	NPR3	natriuretic peptide receptor C/guanylate cyclase C (atrionatriuretic peptide receptor C)	6.73175	6.61128	6.42693	6.36115	5.20402	5.28418	5.20712	5.11455	6.71308e-06	4.0947e-05	1.33031
8164343	NM_001035254	FAM102A	family with sequence similarity 102, member A	8.33515	8.55182	8.30983	8.36933	7.18232	6.90561	7.01035	7.14798	4.07772e-06	2.93445e-05	1.32997
8084423	NM_002808	PSMD2	proteasome (prosome, macropain) 26S subunit, non-ATPase, 2	10.8976	10.8551	11.0074	10.8224	9.57338	9.57113	9.57802	9.54055	5.88088e-08	2.22214e-06	1.32986
8125447	NM_002123	HLA-DQB1	major histocompatibility complex, class II, DQ beta 1	8.874	8.9986	8.83001	9.12801	7.58917	7.70641	7.77695	7.43944	1.10225e-05	5.72481e-05	1.32966
7975595	NM_024644	C14orf169	chromosome 14 open reading frame 169	8.12394	7.84666	8.04446	8.19075	6.81503	6.65368	6.98814	6.43053	7.81865e-05	0.000234841	1.32961
8157890	NM_006195	PBX3	pre-B-cell leukemia homeobox 3	10.495	10.7231	10.4611	10.7685	9.25467	9.20768	9.28538	9.38376	4.82575e-06	3.28662e-05	1.32908
8010983	NM_021962	ABR	active BCR-related	9.10127	9.31007	9.16554	9.3015	7.95045	7.81601	7.96627	7.83022	8.71653e-07	1.11742e-05	1.32885
8054329	NM_173647	RNF149	ring finger protein 149	9.17098	9.1408	9.1884	9.05235	7.71301	7.52981	8.03705	7.96008	3.24721e-05	0.000122129	1.32815
8180349	NM_003290	TPM4	tropomyosin 4	11.1294	11.0599	11.2278	11.0813	9.82244	9.61191	9.93722	9.81702	2.49675e-06	2.12554e-05	1.32746
7974870	NM_003082	SNAPC1	small nuclear RNA activating complex, polypeptide 1, 43kDa	11.275	11.4251	11.3548	11.4224	9.83054	10.1366	9.7327	10.4694	0.00023356	0.000541224	1.32702
8113250	NM_001040458	ERAP1	endoplasmic reticulum aminopeptidase 1	8.37349	8.45505	8.3655	8.33134	6.94437	7.0813	7.23066	6.96245	1.52446e-06	1.60303e-05	1.32665
8148000	NM_001025357	AARD	alanine and arginine rich domain containing protein	8.75028	8.80002	8.6702	8.64421	7.42719	7.14272	7.46096	7.52891	7.13764e-06	4.27287e-05	1.32623
7943218	NM_015368	PANX1	pannexin 1	10.0241	9.86762	10.0043	9.82645	8.5821	8.47728	8.8061	8.5533	4.7358e-06	3.24411e-05	1.32592
8109333	NM_002084	GPX3	glutathione peroxidase 3 (plasma)	8.73256	8.81313	8.70978	9.04613	7.41932	7.65283	7.32704	7.59882	1.7956e-05	8.06095e-05	1.3259
8117834	NM_021959	PPP1R11	protein phosphatase 1, regulatory (inhibitor) subunit 11	10.2218	10.4422	10.257	10.4162	9.05298	8.89058	9.00586	9.08503	1.39472e-06	1.51902e-05	1.32567
8177744	NM_021959	PPP1R11	protein phosphatase 1, regulatory (inhibitor) subunit 11	10.2218	10.4422	10.257	10.4162	9.05298	8.89058	9.00586	9.08503	1.39472e-06	1.51902e-05	1.32567
8119016	NM_002754	MAPK13	mitogen-activated protein kinase 13	7.84395	7.64129	7.62258	7.56453	6.54927	6.29556	6.37273	6.15568	1.29376e-05	6.43185e-05	1.32478
8179827	NM_001288	CLIC1	chloride intracellular channel 1	12.7201	12.6424	12.6913	12.6311	11.3987	11.4263	11.2826	11.2844	7.89451e-08	2.72846e-06	1.32322
8137670	NM_002607	PDGFA	platelet-derived growth factor alpha polypeptide	8.20637	8.44372	8.1508	8.45229	6.96621	6.84203	7.19126	6.96335	1.72697e-05	7.837e-05	1.32258
8144880	NM_022071	SH2D4A	SH2 domain containing 4A	7.88314	8.0584	7.83303	7.83612	6.44139	6.46521	6.61248	6.80346	1.08257e-05	5.65298e-05	1.32204
7994659	NM_017458	MVP	major vault protein	7.72193	7.66915	7.66005	7.84653	6.48802	6.33683	6.31826	6.46639	6.41326e-07	9.33636e-06	1.32204
7897482	NM_005026	PIK3CD	phosphatidylinositol-4,5-bisphosphate 3-kinase, catalytic subunit delta	7.94037	7.98834	7.95122	8.10396	6.82816	6.67765	6.57856	6.61191	1.08067e-06	1.29686e-05	1.3219
8139977	NM_001013739	STAG3L3	stromal antigen 3-like 3	10.4456	10.7344	10.3968	10.6417	9.26587	8.8809	9.36664	9.41892	0.000100081	0.000282593	1.32156
8145055	NM_006129	BMP1	bone morphogenetic protein 1	8.14268	8.49452	8.14306	8.42685	6.96129	6.91698	7.02404	7.02126	9.32692e-06	5.10266e-05	1.32088
8055222	NM_001083538	POTEE	POTE ankyrin domain family, member E	5.85696	6.12357	6.01063	6.30306	4.65941	4.80588	4.79633	4.75235	1.15241e-05	5.9035e-05	1.32006
8153175	NM_031466	TRAPPC9	trafficking protein particle complex 9	8.74536	8.99208	8.74695	8.91611	7.45561	7.62583	7.55302	7.48758	1.77886e-06	1.74931e-05	1.31961
8125870	NM_001093728	TCP11	t-complex 11, testis-specific	7.38489	7.5963	7.17814	7.50177	6.33492	6.05853	6.00787	5.98541	3.55245e-05	0.000130098	1.31859
8025414	NM_004218	RAB11B	RAB11B, member RAS oncogene family	10.0822	10.2823	9.92513	10.1616	8.95283	8.78089	8.70107	8.74744	7.66702e-06	4.47138e-05	1.31724
8040238	NM_134421	HPCAL1	hippocalcin-like 1	9.06953	8.90316	9.02304	8.80908	7.66531	7.51991	7.71261	7.64324	1.70504e-06	1.70117e-05	1.31594
8178598	NM_001288	CLIC1	chloride intracellular channel 1	12.683	12.6464	12.7163	12.6382	11.394	11.4273	11.2797	11.3202	3.9828e-08	1.76175e-06	1.31568
8178884	NM_006120	HLA-DMA	major histocompatibility complex, class II, DM alpha	8.92007	9.00837	8.76455	8.91833	7.60618	7.47085	7.54911	7.72392	1.9583e-06	1.8499e-05	1.31532
8180086	NM_006120	HLA-DMA	major histocompatibility complex, class II, DM alpha	8.92007	9.00837	8.76455	8.91833	7.60618	7.47085	7.54911	7.72392	1.9583e-06	1.8499e-05	1.31532
7948656	NM_002032	FTH1	ferritin, heavy polypeptide 1	10.6651	10.8959	10.7337	10.6341	9.54902	9.24649	9.54411	9.32892	9.59178e-06	5.21892e-05	1.3151
8180362	NM_201274	MPRIP	myosin phosphatase Rho interacting protein	10.7465	10.774	10.7008	10.6565	9.32171	9.25606	9.54828	9.49869	2.12417e-06	1.9374e-05	1.31326
8050894	NM_002254	KIF3C	kinesin family member 3C	8.72056	8.82192	8.76164	8.74666	7.29458	7.45521	7.47463	7.57361	6.98128e-07	9.85634e-06	1.31319
8069689	NM_007038	ADAMTS5	ADAM metallopeptidase with thrombospondin type 1 motif, 5	7.1681	7.59135	7.28823	7.62471	5.8153	6.26329	6.10637	6.23818	0.000135056	0.000353473	1.31231
8069269	NM_001848	COL6A1	collagen, type VI, alpha 1	8.91201	8.76982	9.0093	8.81788	7.56188	7.57242	7.59199	7.53481	3.31258e-07	6.30532e-06	1.31198
8104079	NM_005245	FAT1	FAT tumor suppressor homolog 1 (Drosophila)	8.7229	8.99445	8.88873	9.07273	7.54919	7.49251	7.65892	7.73593	8.11954e-06	4.63798e-05	1.31057
7897172	NM_182752	TPRG1L	tumor protein p63 regulated 1-like	9.22735	9.09429	9.17909	8.98724	7.9782	7.64505	7.68543	7.93809	1.23956e-05	6.23534e-05	1.3103
8111925	NM_001014279	ANXA2R	annexin A2 receptor	6.15439	6.80294	6.3748	6.37853	5.0618	5.05279	5.27744	5.07843	0.000106278	0.000294761	1.31005
8178676	NM_000434	NEU1	sialidase 1 (lysosomal sialidase)	10.1464	9.974	10.0961	9.90828	8.92268	8.57725	8.70351	8.68254	6.96602e-06	4.20118e-05	1.3097
8032249	NM_213604	ADAMTSL5	ADAMTS-like 5	8.10362	7.72257	7.92805	7.93979	6.86135	6.71827	6.44229	6.43971	5.76604e-05	0.000187343	1.3081
8093878	NM_153717	EVC	Ellis van Creveld syndrome	8.75612	8.59162	8.65764	8.65295	7.32194	7.26536	7.19888	7.64106	1.52798e-05	7.19864e-05	1.30777
7983744	NM_014547	TMOD3	tropomodulin 3 (ubiquitous)	9.72994	9.83282	9.79582	9.85293	8.34572	8.35323	8.52053	8.76172	1.32377e-05	6.53809e-05	1.30758
8127943	NM_153816	SNX14	sorting nexin 14	9.76066	9.93781	9.78916	10.0733	8.61084	8.59477	8.53566	8.58973	2.13672e-06	1.94337e-05	1.30749
7981068	NM_001002236	SERPINA1	serpin peptidase inhibitor, clade A (alpha-1 antiproteinase, antitrypsin), member 1	6.89522	7.30703	6.87608	7.19936	5.99907	5.49208	6.0156	5.54396	0.000330912	0.000711551	1.30674
8133610	NM_001013739	STAG3L3	stromal antigen 3-like 3	10.4156	10.6553	10.3441	10.5793	9.23366	8.86292	9.2908	9.38192	6.89471e-05	0.000213674	1.30626
8035958	NM_032816	CEP89	centrosomal protein 89kDa	9.10315	9.39169	9.22037	9.23804	8.01098	7.84457	7.90735	7.96677	1.45614e-06	1.5597e-05	1.3059
8153488	NM_198488	FAM83H	family with sequence similarity 83, member H	8.4657	8.30846	8.28123	8.14059	7.14623	6.8763	7.28433	6.67129	0.000139624	0.00036198	1.30446
8140196	NM_001025202	STAG3L2	stromal antigen 3-like 2	10.4332	10.6818	10.3584	10.5645	9.23742	8.89932	9.31134	9.37301	5.1122e-05	0.000171074	1.30424
8073088	NM_021822	APOBEC3G	apolipoprotein B mRNA editing enzyme, catalytic polypeptide-like 3G	6.65421	6.44768	6.26079	6.85679	5.71311	5.00675	4.89963	5.38381	0.00118474	0.00198087	1.30405
7942417	NM_014786	ARHGEF17	Rho guanine nucleotide exchange factor (GEF) 17	7.65422	7.76837	7.42654	7.69851	6.45119	6.2708	6.3663	6.25333	5.63165e-06	3.61154e-05	1.3015
8177938	NM_014068	PSORS1C1	psoriasis susceptibility 1 candidate 1	6.85332	6.9232	6.92825	7.10024	5.65696	5.85563	5.6164	5.47489	9.17957e-06	5.04761e-05	1.30028
8108378	NM_001903	CTNNA1	catenin (cadherin-associated protein), alpha 1, 102kDa	11.1774	11.129	11.1702	11.0871	9.72242	9.71371	9.93899	9.98847	2.29457e-06	2.01756e-05	1.30003
7956166	NM_015292	ESYT1	extended synaptotagmin-like protein 1	10.1573	10.3452	10.2132	10.2921	8.90164	8.89733	8.98607	9.02421	2.75663e-07	5.72555e-06	1.2996
8162490	NM_032558	HIATL1	hippocampus abundant transcript-like 1	8.27855	8.69528	8.16366	8.79973	7.06178	7.41802	7.27827	6.98308	0.000409314	0.000841086	1.29902
8140061	NM_001707	BCL7B	B-cell CLL/lymphoma 7B	9.96942	10.0933	10.0051	10.1284	8.70937	8.68605	8.76788	8.83777	2.2093e-07	5.0059e-06	1.29876
8065719	NM_007238	PXMP4	peroxisomal membrane protein 4, 24kDa	7.87663	8.04449	7.93102	7.81521	6.6195	6.7301	6.72964	6.39323	8.45437e-06	4.76198e-05	1.29872
8122724	NM_025218	ULBP1	UL16 binding protein 1	9.08684	9.43374	9.08658	9.46175	8.07707	7.85641	7.97941	7.96856	2.72627e-05	0.00010807	1.29687
7986010	NM_003870	IQGAP1	IQ motif containing GTPase activating protein 1	11.7051	11.794	11.6841	11.7514	10.4076	10.3705	10.5434	10.4256	1.10994e-07	3.36444e-06	1.29685
7906564	NM_003768	PEA15	phosphoprotein enriched in astrocytes 15	12.0093	12.1595	11.9944	12.1537	10.8096	10.9387	10.6126	10.7756	3.71561e-06	2.76108e-05	1.29507
8178526	NM_004639	BAG6	BCL2-associated athanogene 6	10.1325	10.1375	10.1494	10.0638	8.86896	8.64737	8.88202	8.90485	8.60523e-07	1.11356e-05	1.29499
8179782	NM_004639	BAG6	BCL2-associated athanogene 6	10.1325	10.1375	10.1494	10.0638	8.86896	8.64737	8.88202	8.90485	8.60523e-07	1.11356e-05	1.29499
7964701	NM_002076	GNS	glucosamine (N-acetyl)-6-sulfatase	10.7068	10.8069	10.6773	10.8698	9.40439	9.34195	9.57091	9.57287	2.21104e-06	1.97493e-05	1.29264
7972737	NM_002312	LIG4	ligase IV, DNA, ATP-dependent	8.36101	8.35508	8.46015	8.38355	6.92161	7.05879	6.99051	7.42162	2.82824e-05	0.000110842	1.29181
8013191	NM_002018	FLII	flightless I homolog (Drosophila)	9.87399	9.88362	9.87975	9.80487	8.66969	8.36765	8.64246	8.5994	1.8441e-06	1.78896e-05	1.29076
8009277	NM_003835	RGS9	regulator of G-protein signaling 9	7.00577	7.3744	7.07884	7.24602	5.87865	5.88924	5.94537	5.8309	5.62677e-06	3.61154e-05	1.29021
8163402	NM_005156	PTBP3	polypyrimidine tract binding protein 3	10.0637	10.2777	10.1334	10.3381	8.84427	8.82463	8.86627	9.11685	8.87917e-06	4.92632e-05	1.29021
7971813	NM_018676	THSD1	thrombospondin, type I, domain containing 1	7.40615	7.55749	7.60245	7.5392	6.31266	6.09855	6.64168	5.89193	0.000235715	0.00054573	1.29012
8124967	NM_004639	BAG6	BCL2-associated athanogene 6	10.1146	10.0803	10.1229	10.0254	8.85135	8.61163	8.85705	8.86286	1.08913e-06	1.30259e-05	1.29007
8164918	NM_017585	SLC2A6	solute carrier family 2 (facilitated glucose transporter), member 6	8.30081	8.30213	8.73341	8.19793	7.1808	7.18346	7.05282	6.95698	6.35691e-05	0.000201292	1.29006
7936798	NM_022034	CUZD1	CUB and zona pellucida-like domains 1	5.48551	6.22713	5.76053	5.80161	4.37357	4.50451	4.22868	5.00889	0.00132671	0.00217781	1.28978
7998784	NM_001089	ABCA3	ATP-binding cassette, sub-family A (ABC1), member 3	8.07596	8.58419	8.15708	8.41951	7.03094	6.87414	7.15558	7.02233	6.29387e-05	0.000199638	1.28844
8123621	NM_004568	SERPINB6	serpin peptidase inhibitor, clade B (ovalbumin), member 6	9.61368	9.58593	9.58384	9.57594	8.3432	8.16271	8.34011	8.35996	1.5958e-07	4.11461e-06	1.28835
8143307	NM_022740	HIPK2	homeodomain interacting protein kinase 2	9.74955	10.0096	9.78601	10.0274	8.51068	8.36026	8.68399	8.86419	6.36482e-05	0.000201395	1.28835
8143279	NM_020119	ZC3HAV1	zinc finger CCCH-type, antiviral 1	10.7676	10.9614	10.7338	10.8987	9.37326	9.36177	9.73592	9.74092	3.8454e-05	0.00013821	1.28738
8136347	NM_033138	CALD1	caldesmon 1	9.22991	9.29006	9.11873	9.28138	7.93002	7.81564	8.06258	7.96506	1.0224e-06	1.24089e-05	1.28669
8026300	NM_078481	CD97	CD97 molecule	8.84784	8.78691	8.79192	8.74667	7.65048	7.26741	7.49498	7.61668	6.95065e-06	4.19711e-05	1.28594
8078380	NM_001137674	ZNF860	zinc finger protein 860	5.84352	6.65108	5.66291	6.35624	4.73065	4.50446	4.95307	5.18344	0.0031521	0.00442036	1.28553
8104590	NM_054027	ANKH	ankylosis, progressive homolog (mouse)	8.33765	8.54324	8.40897	8.405	7.26213	7.04779	6.90915	7.33637	2.02885e-05	8.79431e-05	1.28486
8056113	NM_002349	LY75	lymphocyte antigen 75	6.30493	6.46455	6.09523	6.46831	4.96212	5.06337	5.13147	5.03896	9.96718e-06	5.34276e-05	1.28428
8112045	NM_007036	ESM1	endothelial cell-specific molecule 1	6.28899	6.00561	6.35987	5.99246	4.77533	5.08853	5.13915	4.51133	0.000325229	0.000702237	1.28315
7971692	NM_012141	INTS6	integrator complex subunit 6	8.34015	8.66246	8.24038	8.69102	7.27003	7.04133	7.24156	7.2497	5.11163e-05	0.000171074	1.28285
8118142	NM_000594	TNF	tumor necrosis factor	7.1737	7.11468	7.45739	7.35556	6.20239	5.97016	5.71316	6.08594	6.63823e-05	0.00020785	1.28242
8177983	NM_000594	TNF	tumor necrosis factor	7.1737	7.11468	7.45739	7.35556	6.20239	5.97016	5.71316	6.08594	6.63823e-05	0.00020785	1.28242
8179263	NM_000594	TNF	tumor necrosis factor	7.1737	7.11468	7.45739	7.35556	6.20239	5.97016	5.71316	6.08594	6.63823e-05	0.00020785	1.28242
8072678	NM_002133	HMOX1	heme oxygenase (decycling) 1	9.42964	9.57374	9.46815	9.59249	8.1128	8.34184	8.3169	8.16545	1.54505e-06	1.61881e-05	1.28176
8180363	NM_015134	MPRIP	myosin phosphatase Rho interacting protein	10.4254	10.5066	10.4317	10.3817	9.04818	8.98817	9.2948	9.2911	5.14639e-06	3.42578e-05	1.28079
8044804	NM_020548	DBI	diazepam binding inhibitor (GABA receptor modulator, acyl-CoA binding protein)	9.95856	9.8344	10.1261	9.85838	8.69552	8.82179	8.46483	8.67412	1.33995e-05	6.59267e-05	1.28028
8033818	NM_058164	OLFM2	olfactomedin 2	9.68826	10.0114	9.57015	9.96405	8.50116	8.58952	8.53582	8.49373	2.30798e-05	9.59217e-05	1.2784
8070819	NM_004339	PTTG1IP	pituitary tumor-transforming 1 interacting protein	10.783	10.684	10.8109	10.6117	9.54898	9.30215	9.45464	9.47365	1.62046e-06	1.65588e-05	1.27754
8037408	NM_002250	KCNN4	potassium intermediate/small conductance calcium-activated channel, subfamily N, member 4	7.2768	6.89992	7.22243	7.0724	5.76505	5.97767	5.81774	5.80712	1.1603e-05	5.9322e-05	1.27599
8178244	NM_002931	RING1	ring finger protein 1	9.38806	9.33193	9.48853	9.23613	8.12542	8.02458	7.90206	8.2894	1.22493e-05	6.17165e-05	1.2758
8020100	NM_006788	RALBP1	ralA binding protein 1	8.9346	8.78583	8.94042	8.93224	7.44463	7.67303	7.69342	7.67936	1.8069e-06	1.76586e-05	1.27566
8047272	NM_015535	SPATS2L	spermatogenesis associated, serine-rich 2-like	9.86905	9.83256	9.83009	9.78906	8.54958	8.50984	8.41836	8.74265	1.79498e-06	1.75748e-05	1.27508
8125500	NM_004159	PSMB8	proteasome (prosome, macropain) subunit, beta type, 8 (large multifunctional peptidase 7)	6.43492	6.29574	6.36266	6.40831	4.96737	5.31825	4.87758	5.23924	2.4847e-05	0.00010095	1.2748
8178855	NM_004159	PSMB8	proteasome (prosome, macropain) subunit, beta type, 8 (large multifunctional peptidase 7)	6.43492	6.29574	6.36266	6.40831	4.96737	5.31825	4.87758	5.23924	2.4847e-05	0.00010095	1.2748
8180049	NM_004159	PSMB8	proteasome (prosome, macropain) subunit, beta type, 8 (large multifunctional peptidase 7)	6.43492	6.29574	6.36266	6.40831	4.96737	5.31825	4.87758	5.23924	2.4847e-05	0.00010095	1.2748
8125537	NM_006120	HLA-DMA	major histocompatibility complex, class II, DM alpha	8.78415	8.89122	8.61266	8.7993	7.5045	7.40846	7.43107	7.64813	3.7156e-06	2.76108e-05	1.27379
8109344	NM_000405	GM2A	GM2 ganglioside activator	9.95044	10.0992	9.94444	10.0545	8.80655	8.51949	8.75044	8.87791	6.19856e-06	3.88177e-05	1.27355
7980246	NM_001040108	MLH3	mutL homolog 3 (E. coli)	6.78958	7.5857	7.18403	7.48244	5.98125	6.22612	5.86458	5.87808	0.000655201	0.00122572	1.27293
8001841	NM_006141	DYNC1LI2	dynein, cytoplasmic 1, light intermediate chain 2	9.90389	9.93987	9.99025	9.87679	8.69572	8.40842	8.70502	8.81056	7.61711e-06	4.45898e-05	1.27277
7998063	NM_006086	TUBB3	tubulin, beta 3 class III	9.48176	9.40012	9.41409	9.27304	8.32822	7.98182	8.16823	8.0022	8.86463e-06	4.92482e-05	1.27213
8179851	NM_000434	NEU1	sialidase 1 (lysosomal sialidase)	10.0459	9.86133	10.0038	9.79541	8.89325	8.5505	8.61173	8.56261	1.43873e-05	6.90364e-05	1.27207
7969736	NM_005766	FARP1	FERM, RhoGEF (ARHGEF) and pleckstrin domain protein 1 (chondrocyte-derived)	8.98098	9.3153	8.99655	9.35799	7.82768	7.91799	8.01946	7.7997	2.85716e-05	0.000111672	1.2715
8089082	NM_080927	DCBLD2	discoidin, CUB and LCCL domain containing 2	10.6528	10.8228	10.7267	10.8052	9.49029	9.37908	9.54153	9.5111	3.34887e-07	6.30532e-06	1.27136
8092578	NM_004454	ETV5	ets variant 5	9.25182	9.39788	9.21651	9.37836	7.86598	7.81977	8.1475	8.32899	6.1965e-05	0.00019737	1.27058
8027241	NM_021047	ZNF253	zinc finger protein 253	6.31395	6.63905	6.03246	6.7669	5.12979	5.35135	5.0345	5.15699	0.000385342	0.000802933	1.26993
8134257	NM_004126	GNG11	guanine nucleotide binding protein (G protein), gamma 11	8.81493	9.38009	8.942	9.48199	8.00616	8.16137	7.41748	7.95445	0.00147483	0.00237037	1.26988
7906863	NM_003115	UAP1	UDP-N-acteylglucosamine pyrophosphorylase 1	11.6406	11.5533	11.6906	11.5675	10.2883	10.4137	10.3567	10.3159	8.90186e-08	2.97353e-06	1.26935
7998510	NM_001287	CLCN7	chloride channel, voltage-sensitive 7	8.58939	8.67487	8.52478	8.47999	7.25421	7.01683	7.55201	7.37057	4.17185e-05	0.000147328	1.26885
8019954	NR_024101	DLGAP1-AS1	DLGAP1 antisense RNA 1	7.4347	8.02431	7.21819	7.74236	6.22988	6.37449	6.22809	6.51259	0.000532038	0.00103567	1.26863
8063078	NM_001127695	CTSA	cathepsin A	11.0682	11.1917	11.0955	11.181	9.86006	9.70669	9.93446	9.96876	1.27524e-06	1.42727e-05	1.2666
7935521	NM_021732	AVPI1	arginine vasopressin-induced 1	9.10734	9.25836	9.09627	9.45774	7.84895	8.18137	7.92879	7.91	2.89446e-05	0.000112654	1.26265
8158725	NM_005157	ABL1	c-abl oncogene 1, non-receptor tyrosine kinase	9.45245	9.52181	9.39522	9.48728	8.25932	8.13012	8.24921	8.16936	8.1762e-08	2.81082e-06	1.26219
8137874	NM_032415	CARD11	caspase recruitment domain family, member 11	6.69952	6.90684	6.76758	6.75326	5.70959	5.46195	5.58909	5.32133	1.08896e-05	5.67601e-05	1.26131
8116724	NM_006567	FARS2	phenylalanyl-tRNA synthetase 2, mitochondrial	9.255	9.36767	9.26996	9.47524	8.15102	8.14735	7.99533	8.03134	1.1869e-06	1.38408e-05	1.26071
7929677	NM_018425	PI4K2A	phosphatidylinositol 4-kinase type 2 alpha	9.59857	9.82837	9.73061	9.71554	8.39185	8.36173	8.51055	8.56646	1.52974e-06	1.60537e-05	1.26062
8008263	NM_002611	PDK2	pyruvate dehydrogenase kinase, isozyme 2	8.42472	8.56253	8.44355	8.53843	7.17403	6.7595	7.48665	7.51473	0.000416017	0.00085219	1.25858
8125059	NM_001288	CLIC1	chloride intracellular channel 1	12.4028	12.3328	12.381	12.3403	11.1751	11.1889	11.0491	11.0174	1.71471e-07	4.27064e-06	1.2566
8011975	NM_177550	SLC13A5	solute carrier family 13 (sodium-dependent citrate transporter), member 5	8.25004	8.16674	8.21553	8.49902	7.07415	6.8564	6.99236	7.18332	1.66384e-05	7.64419e-05	1.25628
8135955	NM_001219	CALU	calumenin	11.2471	11.2472	11.2402	11.2991	10.0572	9.7582	10.1628	10.0334	7.10071e-06	4.25863e-05	1.2555
8025551	NM_018381	C19orf66	chromosome 19 open reading frame 66	7.93304	7.95533	7.70429	8.12682	6.55477	6.76313	6.83254	6.54847	3.18234e-05	0.000120493	1.25514
8143555	NM_001001658	OR9A2	olfactory receptor, family 9, subfamily A, member 2	6.15422	6.79923	5.7609	6.69323	5.22395	5.03883	5.09829	5.03031	0.00224731	0.00333711	1.25405
8146738	NM_001136161	MCMDC2	minichromosome maintenance domain containing 2	6.2101	6.49262	6.34734	6.71597	5.06631	5.39735	5.1256	5.17136	7.23154e-05	0.000221467	1.25135
7941104	NM_001667	ARL2	ADP-ribosylation factor-like 2	11.8978	11.8748	11.8256	11.8396	10.7713	10.4345	10.6214	10.6069	2.11476e-06	1.93289e-05	1.25093
7931204	NM_022126	LHPP	phospholysine phosphohistidine inorganic pyrophosphate phosphatase	8.81069	9.16674	8.73066	9.07267	7.69685	7.71133	7.71052	7.65853	2.07141e-05	8.91025e-05	1.25088
8062532	NM_001164431	ARHGAP40	Rho GTPase activating protein 40	6.73865	6.6617	6.3389	6.77501	5.38011	5.39744	5.4733	5.2669	2.53353e-05	0.000102546	1.24913
7933877	NM_004241	JMJD1C	jumonji domain containing 1C	11.1282	10.9716	11.098	11.1552	9.79665	9.885	9.77102	9.90737	3.60679e-07	6.55623e-06	1.24822
8134869	NM_002593	PCOLCE	procollagen C-endopeptidase enhancer	8.90571	8.98926	8.89831	9.16751	7.83103	7.84366	7.65432	7.64431	5.45069e-06	3.55265e-05	1.24687
7897378	NM_016831	PER3	period circadian clock 3	7.32403	7.39485	7.25638	7.30194	6.08014	6.11241	5.96997	6.12854	1.64934e-07	4.17507e-06	1.24654
8007637	NM_001466	FZD2	frizzled family receptor 2	8.58513	8.57044	8.59879	8.54378	7.25325	7.5013	7.39974	7.16311	3.33448e-06	2.57549e-05	1.24518
8006736	NM_007026	DUSP14	dual specificity phosphatase 14	8.4732	8.66111	8.71656	8.61506	7.50616	7.186	7.26098	7.53707	1.84317e-05	8.21475e-05	1.24393
7942697	NM_004055	CAPN5	calpain 5	8.3109	8.379	8.34578	8.40629	7.16861	7.20436	7.10413	6.9892	3.33508e-07	6.30532e-06	1.24392
8135601	NM_001127500	MET	met proto-oncogene (hepatocyte growth factor receptor)	9.26032	9.45893	9.30809	9.41226	7.99287	7.99759	8.22356	8.25671	6.225e-06	3.88182e-05	1.24222
8023497	NM_005603	ATP8B1	ATPase, aminophospholipid transporter, class I, type 8B, member 1	6.37913	7.02987	6.5287	7.02968	5.35257	5.60043	5.4344	5.61319	0.000467856	0.000935476	1.2417
7964757	NM_016836	RBMS1	RNA binding motif, single stranded interacting protein 1	10.4208	10.7351	10.3335	10.876	9.29554	9.19005	9.1939	9.72038	0.000454454	0.000914196	1.24137
7925904	NM_001040177	AKR1E2	aldo-keto reductase family 1, member E2	7.10509	7.39282	7.27073	7.30887	5.98228	5.85399	6.30025	5.97626	3.36638e-05	0.00012505	1.24118
7926875	NM_012342	BAMBI	BMP and activin membrane-bound inhibitor homolog (Xenopus laevis)	8.55028	8.20948	8.67293	8.20266	7.30265	7.04025	7.13713	7.19226	8.11351e-05	0.000241737	1.24076
8047910	NM_005048	PTH2R	parathyroid hormone 2 receptor	6.14523	6.46469	6.48967	6.3328	4.96985	5.21841	4.89698	5.3841	0.000102993	0.00028849	1.24076
8099467	NM_005130	FGFBP1	fibroblast growth factor binding protein 1	6.61614	7.06976	6.56258	6.93044	5.62243	5.60761	5.54188	5.44412	7.22231e-05	0.000221293	1.24072
8110491	NM_014594	ZNF354C	zinc finger protein 354C	6.81205	6.54249	6.3746	6.5907	5.27225	5.468	5.23411	5.3831	2.18776e-05	9.24203e-05	1.2406
8083901	NM_022763	FNDC3B	fibronectin type III domain containing 3B	10.0539	10.1936	10.0882	10.2215	8.86602	8.74504	9.02417	8.96515	2.73237e-06	2.2556e-05	1.23919
8025918	NM_001299	CNN1	calponin 1, basic, smooth muscle	7.87436	7.75225	7.86799	7.88606	6.50642	6.60069	6.66104	6.6596	2.20735e-07	5.0059e-06	1.23823
8152506	NM_207506	SAMD12	sterile alpha motif domain containing 12	7.63146	8.05549	7.75542	8.11696	6.45293	6.63897	6.55943	6.95634	0.000239673	0.000552646	1.23792
8094625	NM_015990	KLHL5	kelch-like family member 5	8.3714	8.56705	8.5553	8.48284	7.19993	7.20854	7.18769	7.42883	2.71827e-06	2.2497e-05	1.2379
8003607	NM_001013672	C17orf97	chromosome 17 open reading frame 97	7.4651	7.43467	7.35878	7.5483	6.01838	6.36106	6.2335	6.2475	5.19365e-06	3.44662e-05	1.2366
8025255	NM_006949	STXBP2	syntaxin binding protein 2	9.05451	9.06757	9.02069	9.05644	7.7066	7.69564	7.95089	7.90227	1.58611e-06	1.64192e-05	1.23595
7900658	NM_005424	TIE1	tyrosine kinase with immunoglobulin-like and EGF-like domains 1	6.92335	7.00056	6.95494	7.03126	5.96887	6.06079	5.64078	5.30214	0.000394907	0.00081895	1.23438
8001564	NM_018110	DOK4	docking protein 4	8.11441	8.25755	8.12288	8.15817	6.95652	7.09173	6.83051	6.84358	1.97994e-06	1.85777e-05	1.23267
7928171	NM_003901	SGPL1	sphingosine-1-phosphate lyase 1	9.86954	9.97158	9.93435	9.99478	8.64015	8.55542	8.90364	8.74356	4.66343e-06	3.21537e-05	1.23187
7938544	NM_021961	TEAD1	TEA domain family member 1 (SV40 transcriptional enhancer factor)	10.0731	10.4094	10.0435	10.3851	9.03275	8.84998	9.08078	9.02163	3.08821e-05	0.00011811	1.23151
8114010	NM_002198	IRF1	interferon regulatory factor 1	7.41365	7.52544	7.65776	7.43598	6.45938	6.4274	6.09078	6.14018	3.12475e-05	0.000119043	1.22877
7936100	NM_015916	CALHM2	calcium homeostasis modulator 2	8.84473	8.57718	8.73689	8.63189	7.49322	7.43638	7.51612	7.43249	1.15015e-06	1.35146e-05	1.22812
8036103	NM_001166034	SBSN	suprabasin	7.64535	7.44209	7.76911	7.51642	6.24555	6.54099	6.38945	6.28676	1.54803e-05	7.26198e-05	1.22755
8051322	NM_000379	XDH	xanthine dehydrogenase	6.72614	6.83119	6.90224	6.69121	5.70269	5.6475	5.54457	5.34589	1.11679e-05	5.76953e-05	1.22754
8010918	NM_001128159	VPS53	vacuolar protein sorting 53 homolog (S. cerevisiae)	9.82291	9.5609	9.79327	9.46211	8.57348	8.28152	8.59428	8.28326	6.14898e-05	0.000196243	1.22666
8094599	NM_016531	KLF3	Kruppel-like factor 3 (basic)	9.62465	10.0031	9.7729	9.95245	8.5824	8.53739	8.58395	8.74444	1.57837e-05	7.36376e-05	1.22623
8118634	NM_002931	RING1	ring finger protein 1	9.1762	9.19708	9.31866	9.03118	7.95685	7.90617	7.83575	8.1219	6.83958e-06	4.15003e-05	1.22561
8058869	NM_022648	TNS1	tensin 1	7.13846	7.37801	7.28353	7.48915	6.49775	6.14932	5.96756	5.77506	0.000371039	0.000779774	1.22486
7902227	NM_001924	GADD45A	growth arrest and DNA-damage-inducible, alpha	10.1395	9.81142	10.162	9.86785	8.8483	8.65516	8.72727	8.85095	2.09432e-05	8.98398e-05	1.22478
8093171	NM_005929	MFI2	antigen p97 (melanoma associated) identified by monoclonal antibodies 133.2 and 96.5	8.8079	9.02885	8.69095	8.63547	7.77151	7.31605	7.64856	7.52872	8.2693e-05	0.000245419	1.22458
8147351	NM_017697	ESRP1	epithelial splicing regulatory protein 1	6.60606	6.57458	6.25809	6.34078	5.28653	5.30676	5.14109	5.14795	1.47607e-05	7.03333e-05	1.2243
8002421	NM_018052	VAC14	Vac14 homolog (S. cerevisiae)	9.23866	9.35739	9.14622	9.4392	8.1258	7.80543	8.22009	8.1335	3.42334e-05	0.00012655	1.22417
8027323	NM_033468	ZNF257	zinc finger protein 257	5.83153	6.77866	5.71922	6.81975	4.82634	5.14265	4.77499	5.51288	0.011687	0.0131143	1.22307
8036252	NM_015526	CLIP3	CAP-GLY domain containing linker protein 3	8.52413	8.44425	8.36542	8.46886	7.41611	7.12847	7.26162	7.10443	4.56547e-06	3.16859e-05	1.22301
7952897	NM_001170738	IQSEC3	IQ motif and Sec7 domain 3	7.94552	7.86839	7.72894	7.78475	6.7972	6.83359	6.38323	6.42441	7.67861e-05	0.000231871	1.22229
8144721	NM_001007090	C8orf48	chromosome 8 open reading frame 48	6.33218	6.07809	6.64624	6.60926	5.32337	5.36882	4.86065	5.22483	0.000440072	0.000891322	1.22203
7946089	NM_033092	TRIM5	tripartite motif containing 5	8.38782	8.55395	8.5438	8.53496	7.30784	7.22211	7.42186	7.19084	1.47235e-06	1.57057e-05	1.21947
8099340	NM_017491	WDR1	WD repeat domain 1	10.9291	10.9098	10.9443	10.8387	9.75403	9.55423	9.69182	9.74761	3.93206e-07	6.89603e-06	1.21855
8137979	NM_001101	ACTB	actin, beta	13.4472	13.5151	13.3206	13.428	12.1131	12.0919	12.4132	12.2266	6.72944e-06	4.0947e-05	1.21659
8011354	NM_145068	TRPV3	transient receptor potential cation channel, subfamily V, member 3	7.12031	7.02115	7.07327	6.8085	5.67527	5.6269	5.95359	5.90499	2.73875e-05	0.000108318	1.21562
8087145	NM_001407	CELSR3	cadherin, EGF LAG seven-pass G-type receptor 3	7.78407	7.84745	7.7306	7.67145	6.63825	6.65292	6.42585	6.45635	2.4037e-06	2.08244e-05	1.21505
8148467	NM_017444	CHRAC1	chromatin accessibility complex 1	10.2737	10.33	10.2048	10.3166	8.92584	8.95802	9.04869	9.33577	1.63105e-05	7.53092e-05	1.21419
8180217	NM_001004126	NA	NA	9.93325	9.97547	9.84794	9.98927	8.72168	8.48632	8.74378	8.93876	1.68651e-05	7.7126e-05	1.21385
8165735	NM_001161531	CSF2RA	colony stimulating factor 2 receptor, alpha, low-affinity (granulocyte-macrophage)	6.99083	7.14282	7.06486	7.10412	5.85144	5.99727	5.95159	5.6527	6.50581e-06	4.00184e-05	1.21241
8176306	NM_001161531	CSF2RA	colony stimulating factor 2 receptor, alpha, low-affinity (granulocyte-macrophage)	6.99083	7.14282	7.06486	7.10412	5.85144	5.99727	5.95159	5.6527	6.50581e-06	4.00184e-05	1.21241
8022356	NM_001128626	SPIRE1	spire homolog 1 (Drosophila)	9.77619	9.82777	9.84872	9.80536	8.48288	8.585	8.67525	8.6721	2.55608e-07	5.45583e-06	1.2107
8018305	NM_016185	HN1	hematological and neurological expressed 1	10.8986	10.8946	10.9914	10.8625	9.63284	9.52195	9.7574	9.89436	7.45977e-06	4.39067e-05	1.21016
7928444	NM_014000	VCL	vinculin	10.4089	10.634	10.3849	10.5779	9.23438	9.04552	9.39704	9.48878	4.38698e-05	0.000153049	1.20999
7918188	NM_013386	SLC25A24	solute carrier family 25 (mitochondrial carrier; phosphate carrier), member 24	9.71466	9.90016	9.7822	10.012	8.46441	8.5585	8.70588	8.84104	2.6575e-05	0.000106078	1.20981
8114920	NM_001387	DPYSL3	dihydropyrimidinase-like 3	8.05338	8.00934	7.9982	7.97694	6.9293	6.71267	6.86544	6.69203	9.80702e-07	1.20592e-05	1.2096
8146142	NM_178819	AGPAT6	1-acylglycerol-3-phosphate O-acyltransferase 6	8.73165	8.65077	8.75641	8.67609	7.5822	7.43127	7.48344	7.47994	8.60785e-08	2.89772e-06	1.20952
8077652	NM_005718	ARPC4	actin related protein 2/3 complex, subunit 4, 20kDa	9.27705	9.07571	9.0896	9.14111	7.94056	7.70645	8.01921	8.08223	1.37091e-05	6.69092e-05	1.20875
8007323	NM_003632	CNTNAP1	contactin associated protein 1	7.42536	7.74859	7.42537	7.57559	6.47897	6.17329	6.34512	6.34356	1.85944e-05	8.26452e-05	1.20849
7947462	NM_145804	ABTB2	ankyrin repeat and BTB (POZ) domain containing 2	7.85216	8.14267	7.94294	8.05439	6.76541	6.84674	6.74206	6.8112	2.00161e-06	1.87036e-05	1.20669
8039593	NM_022103	ZNF667	zinc finger protein 667	6.50413	6.93109	6.73366	6.71595	5.49095	5.56269	5.57774	5.42698	1.36836e-05	6.68729e-05	1.20662
7906307	NM_018240	KIRREL	kin of IRRE like (Drosophila)	8.35168	8.67049	8.40083	8.62397	7.10144	7.3448	7.3274	7.44955	3.0884e-05	0.00011811	1.20594
7985934	NM_020210	SEMA4B	sema domain, immunoglobulin domain (Ig), transmembrane domain (TM) and short cytoplasmic domain, (semaphorin) 4B	8.14318	7.85455	7.97489	7.99175	6.84387	6.67913	6.79115	6.82951	2.44957e-06	2.10669e-05	1.20518
8144121	NM_002847	PTPRN2	protein tyrosine phosphatase, receptor type, N polypeptide 2	7.75073	7.69991	7.60263	7.65446	6.85914	6.69298	6.29096	6.04709	0.000681685	0.00126558	1.20439
8094101	NM_001014448	CPZ	carboxypeptidase Z	8.10606	8.03619	7.85071	7.95972	6.79436	6.98207	6.83591	6.52989	3.29365e-05	0.000123303	1.20261
8072413	NM_134269	SMTN	smoothelin	8.70185	8.75334	8.71069	8.51579	7.49367	7.65828	7.57331	7.14675	6.90568e-05	0.000213814	1.20241
8178188	NR_003129	RNF5P1	ring finger protein 5, E3 ubiquitin protein ligase pseudogene 1	10.262	10.2292	10.2365	10.2821	9.13727	9.11459	8.92422	9.02882	3.35414e-07	6.30532e-06	1.20124
8043995	NM_000877	IL1R1	interleukin 1 receptor, type I	7.13578	7.48894	7.23034	7.30958	5.90065	6.31872	5.82067	6.32112	0.000227288	0.00052956	1.20087
8174474	NM_022977	ACSL4	acyl-CoA synthetase long-chain family member 4	9.692	9.76005	9.84609	9.82831	8.43439	8.67703	8.59721	8.61571	1.29962e-06	1.44805e-05	1.20053
8008139	NM_023079	UBE2Z	ubiquitin-conjugating enzyme E2Z	11.2053	11.2644	11.2291	11.2545	10.0489	10.0142	10.0594	10.0289	4.84951e-10	3.21741e-07	1.2005
8015806	NM_001079675	ETV4	ets variant 4	8.34996	8.50533	8.22045	8.4235	7.24296	6.87786	7.33174	7.2458	5.18954e-05	0.000173148	1.20022
8010426	NM_020914	RNF213	ring finger protein 213	8.18111	8.30949	7.98691	8.37554	6.87101	6.91814	7.22319	7.04044	4.81177e-05	0.000163511	1.20007
7999598	NM_173474	NTAN1	N-terminal asparagine amidase	9.59809	9.69594	9.77156	9.57905	8.43846	8.75318	8.30791	8.34505	3.63714e-05	0.000132451	1.20001
8060758	NM_000311	PRNP	prion protein	11.6107	11.6119	11.6539	11.6331	10.5395	10.3744	10.2897	10.5077	9.36766e-07	1.16965e-05	1.19959
8153684	NM_012079	DGAT1	diacylglycerol O-acyltransferase 1	9.14181	9.27513	9.13232	9.12108	8.04469	7.83933	8.00728	7.98744	8.14867e-07	1.07767e-05	1.1979
8153939	NM_012079	DGAT1	diacylglycerol O-acyltransferase 1	9.14181	9.27513	9.13232	9.12108	8.04469	7.83933	8.00728	7.98744	8.14867e-07	1.07767e-05	1.1979
8069301	NM_001849	COL6A2	collagen, type VI, alpha 2	9.22802	9.0692	9.10568	8.96012	8.05921	7.87759	7.89863	7.73891	8.41637e-06	4.74883e-05	1.19717
8123864	NM_003220	TFAP2A	transcription factor AP-2 alpha (activating enhancer binding protein 2 alpha)	9.61594	10.2559	9.59981	10.3021	8.74498	8.44086	8.81615	8.98312	0.0017815	0.00275955	1.19714
7996761	NM_012320	PLA2G15	phospholipase A2, group XV	8.19997	8.57194	8.30054	8.40832	7.18401	7.18809	7.17998	7.1428	5.73263e-06	3.6546e-05	1.19647
8103998	NM_018359	UFSP2	UFM1-specific peptidase 2	8.28504	8.80373	8.27063	8.90199	7.45504	7.34997	7.25386	7.41706	0.000451544	0.00090928	1.19636
8072735	NM_145343	APOL1	apolipoprotein L, 1	6.57864	6.2897	6.21305	6.35205	5.29157	5.1999	4.98572	5.17526	2.27716e-05	9.51119e-05	1.19524
7898988	NM_013943	CLIC4	chloride intracellular channel 4	12.4022	12.504	12.5096	12.3865	11.1695	11.0425	11.4285	11.3824	1.68706e-05	7.7126e-05	1.19487
8115490	NM_033274	ADAM19	ADAM metallopeptidase domain 19	8.47093	8.58011	8.46146	8.30822	7.44597	7.30267	7.16689	7.12935	1.21843e-05	6.15585e-05	1.19396
8104141	NM_052909	PLEKHG4B	pleckstrin homology domain containing, family G (with RhoGef domain) member 4B	7.30743	7.23977	7.18652	7.43441	6.20375	5.82393	6.17189	6.19776	3.02425e-05	0.000116516	1.1927
7949465	NM_021975	RELA	v-rel reticuloendotheliosis viral oncogene homolog A (avian)	9.4993	9.69066	9.44744	9.58356	8.2689	8.31293	8.36291	8.50995	3.83495e-06	2.81285e-05	1.19157
8018849	NM_003258	TK1	thymidine kinase 1, soluble	9.73099	9.78579	9.65024	9.58282	8.50634	8.52486	8.5022	8.46022	2.40782e-07	5.23382e-06	1.18906
8150364	NM_031940	TM2D2	TM2 domain containing 2	8.86334	9.03711	8.88911	8.93551	7.70678	7.74553	7.61844	7.90334	2.86545e-06	2.32693e-05	1.18774
8058849	NM_020814	2014-03-04	membrane-associated ring finger (C3HC4) 4, E3 ubiquitin protein ligase	7.52551	7.96235	7.54509	7.71797	6.53129	6.54164	6.59346	6.33371	5.11765e-05	0.000171124	1.18771
7937518	NM_001025237	TSPAN4	tetraspanin 4	8.96808	8.79825	8.93813	8.934	7.83279	7.48286	7.83843	7.73372	1.28432e-05	6.40211e-05	1.18766
8084963	NM_002577	PAK2	p21 protein (Cdc42/Rac)-activated kinase 2	8.88723	9.22369	8.84325	9.16476	7.71585	7.62969	7.87472	8.15284	0.000215806	0.000508446	1.18645
8094948	NM_020846	SLAIN2	SLAIN motif family, member 2	10.9235	11.162	10.872	11.1762	9.75947	9.80704	9.88952	9.93242	1.04787e-05	5.54325e-05	1.18633
8067248	NR_003505	PPP4R1L	protein phosphatase 4, regulatory subunit 1-like	7.20713	7.41309	7.3324	7.50117	6.21194	6.20281	6.03785	6.25645	5.39196e-06	3.52943e-05	1.18618
8078529	NM_003149	STAC	SH3 and cysteine rich domain	6.17629	6.3286	6.26628	6.45394	4.97665	5.32468	5.18546	4.99444	2.35059e-05	9.70839e-05	1.18597
8009301	NM_002737	PRKCA	protein kinase C, alpha	8.52368	9.07455	8.63316	9.13372	7.58765	7.70104	7.62217	7.71126	0.000277641	0.000620196	1.18575
8146000	NM_003816	ADAM9	ADAM metallopeptidase domain 9	11.4944	11.4935	11.4496	11.5187	10.2612	10.3467	10.3741	10.2378	5.13814e-08	2.07455e-06	1.18411
7918593	NM_175744	RHOC	ras homolog family member C	11.8783	11.8414	11.9123	11.7751	10.6992	10.8256	10.5735	10.5737	2.12726e-06	1.93749e-05	1.18377
8058238	NM_001168221	ALS2CR11	amyotrophic lateral sclerosis 2 (juvenile) chromosome region, candidate 11	6.27223	6.55043	6.32256	6.4086	5.29157	5.19293	5.1238	5.21552	2.75461e-06	2.26387e-05	1.1825
8030925	NM_001145434	ZNF880	zinc finger protein 880	7.13836	7.16371	6.99049	7.0592	5.97156	5.86318	5.92809	5.86186	2.80524e-07	5.75702e-06	1.18177
8133728	NM_001110354	ZP3	zona pellucida glycoprotein 3 (sperm receptor)	7.79353	7.9755	7.58515	7.52701	6.34055	6.69072	6.66952	6.45459	0.00011393	0.000310731	1.18145
7903203	NM_015976	SNX7	sorting nexin 7	8.05573	8.3154	8.24609	8.57539	6.83685	7.25423	7.06176	7.31863	0.000245771	0.000563675	1.18029
7932985	NM_003873	NRP1	neuropilin 1	7.36029	7.78581	7.33394	7.9097	6.20328	6.34253	6.52114	6.60659	0.000480334	0.000955672	1.17905
8070689	NM_007031	HSF2BP	heat shock transcription factor 2 binding protein	7.92275	8.09022	8.19395	8.39653	7.14081	6.77727	7.10046	6.86978	0.000113282	0.000309354	1.17878
8027778	NR_028406	FXYD5	FXYD domain containing ion transport regulator 5	9.83848	9.96614	9.81093	9.92852	8.75393	8.63087	8.71205	8.73704	2.24756e-07	5.03094e-06	1.17754
7914094	NM_006990	WASF2	WAS protein family, member 2	8.79751	8.90025	8.75504	8.84681	7.72078	7.56645	7.61025	7.69272	2.86441e-07	5.84635e-06	1.17735
8099259	NM_198595	AFAP1	actin filament associated protein 1	8.31388	8.67266	8.53586	8.54343	7.23142	7.16707	7.57181	7.38718	5.58865e-05	0.000182863	1.17709
8175900	NM_001164741	ARHGAP4	Rho GTPase activating protein 4	8.04611	7.84222	8.07217	7.66936	6.61082	6.79475	6.88759	6.63498	5.19021e-05	0.000173148	1.17543
7956261	NM_002898	RBMS2	RNA binding motif, single stranded interacting protein 2	9.68614	9.92767	9.57146	9.87005	8.64215	8.73951	8.26583	8.70646	0.000137195	0.000357771	1.17534
8117429	NM_003525	HIST1H2BI	histone cluster 1, H2bi	6.15086	5.77301	6.17091	5.80259	4.55342	5.01806	4.80985	4.81468	0.000181308	0.000443452	1.17534
8167322	NM_017883	WDR13	WD repeat domain 13	8.79719	8.76626	8.73184	8.63207	7.59795	7.70443	7.47543	7.44992	2.59868e-06	2.18124e-05	1.1749
8180346	NM_000581	GPX1	glutathione peroxidase 1	10.5771	10.309	10.5507	10.1793	9.33832	9.39898	9.21541	8.96397	0.00013303	0.000349795	1.17487
8054804	NM_019044	CCDC93	coiled-coil domain containing 93	10.043	10.1076	10.0221	10.105	8.85983	8.74229	8.9261	9.05239	2.47685e-06	2.1203e-05	1.17424
8180279	NM_031501	PCDHA5	protocadherin alpha 5	7.68323	8.09612	8.20066	7.75339	6.83405	6.53615	6.8278	6.84104	0.000206545	0.000490911	1.17359
8162744	NM_003389	CORO2A	coronin, actin binding protein, 2A	7.37737	7.55445	7.60273	7.61862	6.19789	6.3252	6.59281	6.34354	2.23609e-05	9.38806e-05	1.17343
8025368	NM_003083	SNAPC2	small nuclear RNA activating complex, polypeptide 2, 45kDa	8.32364	8.22747	8.57659	8.2792	7.31231	7.1611	7.15777	7.08871	1.32421e-05	6.53809e-05	1.17175
8148824	NM_005526	HSF1	heat shock transcription factor 1	9.06946	9.0773	9.06025	8.96669	8.01409	7.797	7.82505	7.8605	6.96465e-07	9.84419e-06	1.16926
8046861	NM_002210	ITGAV	integrin, alpha V	10.7036	10.6769	10.6912	10.7348	9.42425	9.40613	9.67879	9.62034	2.91398e-06	2.35454e-05	1.16924
7975607	NM_152331	ACOT4	acyl-CoA thioesterase 4	6.0609	5.80214	5.86387	6.14795	4.95161	4.7428	5.03082	4.47509	0.000222491	0.000520663	1.16863
8090070	NM_183357	ADCY5	adenylate cyclase 5	7.13233	7.3561	7.37426	7.17638	6.17498	6.13828	6.32373	5.73152	0.000167274	0.000415637	1.16764
8127502	NR_026807	LINC00472	long intergenic non-protein coding RNA 472	8.78116	9.19617	8.60384	9.13371	7.77988	7.85915	7.63737	7.77859	0.000231061	0.000536488	1.16497
8157761	NM_001145001	NEK6	NIMA-related kinase 6	9.10663	9.27525	9.17112	9.10458	8.00436	8.02419	7.98209	7.98925	1.28345e-07	3.64675e-06	1.16442
7925589	NM_001167740	SMYD3	SET and MYND domain containing 3	8.69169	8.75183	8.63745	8.74059	7.54327	7.53176	7.3867	7.70338	2.96541e-06	2.37553e-05	1.16411
7944722	NM_032873	UBASH3B	ubiquitin associated and SH3 domain containing B	8.5853	8.54253	8.52378	8.49372	7.35007	7.48949	7.19929	7.45378	2.51638e-06	2.13707e-05	1.16318
8008087	NM_003204	NFE2L1	nuclear factor (erythroid-derived 2)-like 1	9.94899	10.1734	9.96955	10.0934	8.96164	8.6391	8.99204	8.94396	2.16211e-05	9.17254e-05	1.16215
8044499	NM_005415	SLC20A1	solute carrier family 20 (phosphate transporter), member 1	10.9247	11.1105	10.9718	11.1205	9.8319	9.66937	9.89713	10.0811	2.22472e-05	9.35548e-05	1.16204
7995552	NM_015247	CYLD	cylindromatosis (turban tumor syndrome)	9.62009	9.71337	9.73236	9.73678	8.57704	8.49345	8.56179	8.52276	3.66067e-08	1.7232e-06	1.16189
8091678	NM_024621	VEPH1	ventricular zone expressed PH domain-containing 1	5.33915	5.74693	5.44985	5.96267	4.59917	4.41219	4.38357	4.4571	0.000240437	0.0005538	1.16164
7938880	NM_001098520	HTATIP2	HIV-1 Tat interactive protein 2, 30kDa	9.50623	9.57004	9.5718	9.55535	8.39405	8.40997	8.34068	8.41379	3.83222e-09	5.89351e-07	1.16123
8056285	NM_022168	IFIH1	interferon induced with helicase C domain 1	5.28825	6.0863	5.22577	6.14911	4.3575	4.68423	4.4294	4.6429	0.0044227	0.00584904	1.15885
7932885	NM_018287	ARHGAP12	Rho GTPase activating protein 12	9.0274	9.16818	9.10688	9.2783	7.82439	7.84703	8.01599	8.25865	5.11682e-05	0.000171124	1.15867
8093320	NM_182524	ZNF595	zinc finger protein 595	5.66688	6.0989	5.77622	6.20706	4.76388	4.88332	4.61067	4.8654	0.000190444	0.000462307	1.15645
7950067	NM_001360	DHCR7	7-dehydrocholesterol reductase	10.3869	10.4464	10.3463	10.3321	9.13395	8.92678	9.3953	9.4299	7.53408e-05	0.000228839	1.15643
8150537	NM_006749	SLC20A2	solute carrier family 20 (phosphate transporter), member 2	8.87654	8.97269	8.91331	8.89173	7.7641	7.54462	7.91017	7.81454	7.03361e-06	4.22817e-05	1.15521
7963333	NM_182507	KRT80	keratin 80	7.11289	7.08546	7.06814	7.09142	6.09546	5.82477	5.95096	5.86664	1.32891e-06	1.46861e-05	1.15502
7936809	NM_152644	FAM24B	family with sequence similarity 24, member B	6.90124	6.92928	7.14591	7.07245	5.89036	5.98728	6.00357	5.54911	7.48363e-05	0.000227627	1.15464
7995834	NR_003669	MT1IP	metallothionein 1I, pseudogene	7.68268	7.48671	7.55847	7.60477	6.66972	6.56627	6.42473	6.05464	0.000176204	0.000433998	1.15431
7972867	NM_001127202	PCID2	PCI domain containing 2	8.94063	9.10813	9.12127	9.21988	7.95832	7.88556	7.90312	8.02916	2.3199e-06	2.03294e-05	1.15344
8154233	NM_014143	CD274	CD274 molecule	5.73542	5.97634	6.07427	5.8683	4.70456	4.71788	4.8498	4.76932	6.91564e-06	4.18443e-05	1.15319
8143397	NM_015689	DENND2A	DENN/MADD domain containing 2A	7.38264	7.41893	7.08748	7.16659	6.09513	6.34972	6.26058	5.74104	0.000325413	0.000702237	1.1523
8117321	NM_006355	TRIM38	tripartite motif containing 38	7.49086	7.94512	7.39861	7.91522	6.43951	6.48541	6.69516	6.5235	0.000276161	0.000617529	1.15156
8096635	NM_003998	NFKB1	nuclear factor of kappa light polypeptide gene enhancer in B-cells 1	9.40312	9.73723	9.61726	9.78204	8.38851	8.38222	8.64331	8.51958	3.41249e-05	0.000126329	1.15151
7950838	NM_007166	PICALM	phosphatidylinositol binding clathrin assembly protein	11.9663	12.0856	11.9442	12.1499	10.8129	10.9768	10.7864	10.9704	3.33413e-06	2.57549e-05	1.14984
8049876	NM_032515	BOK	BCL2-related ovarian killer	8.71034	8.53093	8.41554	8.31371	7.3655	7.48945	7.20006	7.31631	3.268e-05	0.000122716	1.1498
7952988	NR_027948	ERC1	ELKS/RAB6-interacting/CAST family member 1	9.9126	10.1984	9.8456	10.1003	8.87795	8.74852	8.80891	9.02321	2.7305e-05	0.000108104	1.14959
7995806	NM_005946	MT1A	metallothionein 1A	7.77434	7.69794	7.92924	7.26518	6.13927	6.15271	6.75698	7.02217	0.00473858	0.00619535	1.14889
8021376	NM_001144967	NEDD4L	neural precursor cell expressed, developmentally down-regulated 4-like, E3 ubiquitin protein ligase	9.31643	9.30496	9.28884	9.30077	8.20756	8.12539	8.13135	8.15214	1.64065e-09	4.62255e-07	1.14864
8053722	NR_027238	LOC654342	lymphocyte-specific protein 1 pseudogene	10.2545	9.99035	10.0022	9.95092	9.10444	8.45516	9.16785	8.87706	0.000608333	0.00115437	1.14838
7932420	NM_014241	PTPLA	protein tyrosine phosphatase-like (proline instead of catalytic arginine), member A	8.80681	9.10574	8.74449	9.16455	7.73868	7.81782	7.86276	7.80968	4.15207e-05	0.00014687	1.14816
8087806	NM_033010	PCBP4	poly(rC) binding protein 4	7.92985	7.83406	7.81736	7.80102	6.78228	6.78259	6.64876	6.57954	1.11163e-06	1.31935e-05	1.14728
8009844	NM_001031803	LLGL2	lethal giant larvae homolog 2 (Drosophila)	7.91954	7.77527	7.6861	7.81318	6.76394	6.68473	6.8473	6.31111	0.000107068	0.000296255	1.14675
8096004	NM_198892	BMP2K	BMP2 inducible kinase	8.64209	8.97609	8.77135	8.97472	7.63131	7.50665	7.76987	7.8701	5.64505e-05	0.000184382	1.14658
7990345	NM_003612	SEMA7A	semaphorin 7A, GPI membrane anchor (John Milton Hagen blood group)	7.91257	7.62375	7.77809	7.68577	6.68189	6.63412	6.8274	6.27095	0.000139224	0.000361271	1.14645
7942204	NM_005231	CTTN	cortactin	9.91579	9.81095	10.0203	9.81848	8.82777	8.42826	8.94292	8.78355	8.04605e-05	0.000240276	1.14576
7988859	NM_006578	GNB5	guanine nucleotide binding protein (G protein), beta 5	8.28446	8.0908	8.23133	8.124	7.03433	7.07374	6.77799	7.26164	4.43881e-05	0.000154524	1.14572
8107897	NM_003687	PDLIM4	PDZ and LIM domain 4	8.22946	8.15418	8.13703	7.95902	7.00286	6.81286	7.39111	6.69114	0.00041932	0.000857465	1.14543
7997427	NM_198390	CMIP	c-Maf inducing protein	8.79454	8.97978	8.62346	8.91536	7.83103	7.29658	7.73938	7.86479	0.000294088	0.000648883	1.14534
7966035	NM_006825	CKAP4	cytoskeleton-associated protein 4	10.3273	10.3775	10.3738	10.4048	9.17262	9.18914	9.34852	9.19292	2.1741e-07	4.96958e-06	1.14505
8116835	NM_145649	GCNT2	glucosaminyl (N-acetyl) transferase 2, I-branching enzyme (I blood group)	6.17163	6.60004	6.44717	6.55279	5.18272	5.30242	5.2938	5.41281	3.89006e-05	0.000139544	1.14497
8158627	NM_014286	NCS1	neuronal calcium sensor 1	9.48086	9.67966	9.47826	9.74642	8.31817	8.31615	8.65256	8.52458	4.06335e-05	0.000144441	1.14343
8151572	NM_022133	SNX16	sorting nexin 16	7.85628	8.22043	7.9089	8.32717	6.72163	7.01265	6.90273	7.10293	0.000194105	0.000468573	1.14321
8002143	NM_000229	LCAT	lecithin-cholesterol acyltransferase	8.3667	8.47089	8.38403	8.18384	7.35746	7.23095	7.08186	7.16281	9.70776e-06	5.24897e-05	1.1431
8054702	NM_152515	CKAP2L	cytoskeleton associated protein 2-like	10.7649	10.932	10.7234	10.9594	9.67162	9.73829	9.58466	9.81306	5.65259e-06	3.6196e-05	1.14302
8076998	NM_012401	PLXNB2	plexin B2	9.09784	9.34101	9.07762	9.30524	8.09466	8.07235	8.06526	8.02852	3.35983e-06	2.58736e-05	1.14023
8070297	NM_001136154	ERG	v-ets erythroblastosis virus E26 oncogene homolog (avian)	6.36991	6.09785	6.37181	6.20592	5.14166	5.16705	5.28983	4.88806	4.18301e-05	0.000147521	1.13972
8001800	NM_001797	CDH11	cadherin 11, type 2, OB-cadherin (osteoblast)	6.57606	6.46074	6.48461	6.16234	5.32695	5.21791	5.23803	5.34343	2.04345e-05	8.83659e-05	1.13936
8011415	NM_002561	P2RX5	purinergic receptor P2X, ligand-gated ion channel, 5	7.20453	7.09437	7.24302	7.14887	6.12042	6.07136	5.80655	6.13564	9.60397e-06	5.22117e-05	1.13921
8061725	NM_015338	ASXL1	additional sex combs like 1 (Drosophila)	9.23237	9.49194	9.24777	9.438	8.20528	8.04632	8.21444	8.38898	2.19222e-05	9.25484e-05	1.13877
8026638	NM_004145	MYO9B	myosin IXB	8.29147	8.42443	8.32696	8.35997	7.14306	7.05191	7.3568	7.29732	5.32139e-06	3.49737e-05	1.13843
8141688	NM_001084	PLOD3	procollagen-lysine, 2-oxoglutarate 5-dioxygenase 3	8.53473	8.76333	8.40585	8.60419	7.39548	7.22618	7.63139	7.50272	5.72533e-05	0.000186253	1.13808
8136200	NM_016352	CPA4	carboxypeptidase A4	6.78054	6.94694	6.84566	6.76084	5.77893	5.82409	5.72979	5.44982	1.93649e-05	8.5049e-05	1.13784
8064978	NM_000214	JAG1	jagged 1	7.3708	7.4433	7.39008	7.60647	6.27877	6.38966	6.38984	6.20117	3.62715e-06	2.72679e-05	1.1378
7916747	NM_002227	JAK1	Janus kinase 1	11.0618	11.0459	11.0949	11.1087	9.95489	9.91344	10.0224	9.87101	5.98975e-08	2.2567e-06	1.1374
8137352	NM_003040	SLC4A2	solute carrier family 4, anion exchanger, member 2 (erythrocyte membrane protein band 3-like 1)	9.16398	8.89691	9.1381	8.84245	7.95978	7.78989	7.9103	7.83245	1.56207e-05	7.30349e-05	1.13725
7939546	NM_002231	CD82	CD82 molecule	8.23887	7.99125	8.11269	7.93558	6.85141	7.01479	6.8389	7.02703	1.04525e-05	5.53391e-05	1.13656
7941985	NM_006019	TCIRG1	T-cell, immune regulator 1, ATPase, H+ transporting, lysosomal V0 subunit A3	8.43673	8.52418	8.41084	8.35561	7.40958	7.10145	7.38363	7.28726	6.64027e-06	4.06142e-05	1.13636
7980616	NM_007039	PTPN21	protein tyrosine phosphatase, non-receptor type 21	8.0601	8.54231	7.87628	8.29426	6.85864	6.93033	7.27951	7.16268	0.000631848	0.00119166	1.13545
8149762	NM_003844	TNFRSF10A	tumor necrosis factor receptor superfamily, member 10a	7.33013	7.37423	7.30323	7.04665	6.00613	6.40306	6.171	5.93596	0.000111369	0.000305448	1.13452
7995492	NM_001114	ADCY7	adenylate cyclase 7	7.88785	7.86429	7.86507	7.81701	6.84181	6.63569	6.73629	6.68428	3.16764e-07	6.19345e-06	1.13404
7967486	NM_025140	CCDC92	coiled-coil domain containing 92	8.43442	8.85618	8.50278	8.93529	7.65046	7.19469	7.6546	7.69406	0.00058987	0.00112742	1.13372
8058390	NM_213589	RAPH1	Ras association (RalGDS/AF-6) and pleckstrin homology domains 1	8.93536	9.36096	9.02581	9.38235	8.12188	7.78087	8.09769	8.17262	0.000231174	0.000536558	1.13285
8012212	NM_020899	ZBTB4	zinc finger and BTB domain containing 4	8.33189	8.55295	8.44385	8.52156	7.49123	7.25461	7.1396	7.43373	2.0771e-05	8.93177e-05	1.13277
8155121	NM_003995	NPR2	natriuretic peptide receptor B/guanylate cyclase B (atrionatriuretic peptide receptor B)	6.8234	6.92514	6.59773	6.70535	5.60111	5.81347	5.68961	5.41909	4.7149e-05	0.000161319	1.13209
8007493	NM_001661	ARL4D	ADP-ribosylation factor-like 4D	7.65922	7.49658	7.67646	7.5702	6.37388	6.63194	6.17824	6.69586	0.000110286	0.000303346	1.13063
7901376	NM_014372	RNF11	ring finger protein 11	9.17391	9.22115	9.20077	9.00987	8.0084	8.19826	7.83731	8.04308	1.40422e-05	6.7903e-05	1.12966
7918657	NM_015967	PTPN22	protein tyrosine phosphatase, non-receptor type 22 (lymphoid)	5.31766	5.56063	5.41953	5.97712	4.46333	4.3665	4.30168	4.62491	0.00041948	0.000857657	1.12963
8134981	NM_003302	TRIP6	thyroid hormone receptor interactor 6	8.50122	8.68613	8.54482	8.54941	7.63664	7.15295	7.4724	7.50482	5.0374e-05	0.000169138	1.12869
8125850	NM_024294	C6orf106	chromosome 6 open reading frame 106	8.98389	9.13316	9.02354	9.14131	8.00358	7.64137	8.10739	8.01999	5.13782e-05	0.000171621	1.1274
7923635	NM_014935	PLEKHA6	pleckstrin homology domain containing, family A member 6	7.94263	7.921	8.07375	7.96932	6.74179	6.98581	6.76959	6.90478	2.75346e-06	2.26387e-05	1.12618
7969414	NM_001730	KLF5	Kruppel-like factor 5 (intestinal)	9.23744	9.38405	9.23742	9.26257	7.99252	7.99825	8.41158	8.21658	4.15338e-05	0.000146876	1.12564
7963946	NM_002429	MMP19	matrix metallopeptidase 19	7.0242	7.15934	6.93327	6.95758	6.0335	6.12094	5.99104	5.42786	0.000494999	0.000979281	1.12526
7899244	NM_017837	PIGV	phosphatidylinositol glycan anchor biosynthesis, class V	8.91482	8.74851	9.02746	8.82407	7.76212	7.59367	7.80761	7.86051	1.03649e-05	5.49876e-05	1.12274
8157751	NM_004789	LHX2	LIM homeobox 2	8.28106	8.62462	8.28421	8.4309	7.30675	7.19389	7.32896	7.30267	1.29485e-05	6.43233e-05	1.12213
8032926	NM_002850	PTPRS	protein tyrosine phosphatase, receptor type, S	9.40921	9.61214	9.40566	9.50491	8.5153	8.22683	8.3279	8.37496	6.70901e-06	4.0947e-05	1.12173
8109563	NM_001099287	NIPAL4	NIPA-like domain containing 4	7.49584	7.81186	7.58633	7.50639	6.76677	6.34205	6.4314	6.37428	9.47162e-05	0.000271287	1.12148
8149448	NM_002445	MSR1	macrophage scavenger receptor 1	5.85605	5.84168	5.78239	5.86891	4.66775	4.90727	4.62894	4.66953	2.80778e-06	2.29737e-05	1.11888
7956088	NM_002868	RAB5B	RAB5B, member RAS oncogene family	10.3947	10.4718	10.5302	10.5734	9.44672	9.33978	9.25465	9.45637	1.79057e-06	1.75543e-05	1.11813
8132557	NM_001129	AEBP1	AE binding protein 1	8.03964	8.05912	7.97231	7.86738	7.11067	6.80923	6.89148	6.6621	3.69257e-05	0.000133905	1.11624
7953569	NM_080549	PTPN6	protein tyrosine phosphatase, non-receptor type 6	7.62149	7.67197	7.83518	7.88787	6.73035	6.60897	6.60802	6.60433	4.13899e-06	2.96701e-05	1.11621
8138091	NM_139179	DAGLB	diacylglycerol lipase, beta	8.47094	8.54101	8.4808	8.52089	7.39783	7.28241	7.54339	7.32694	1.47665e-06	1.57165e-05	1.11577
8164967	NM_001134398	VAV2	vav 2 guanine nucleotide exchange factor	8.12685	8.48899	8.265	8.4306	7.38762	6.83825	7.18104	7.44683	0.000436252	0.00088502	1.11442
8107887	NM_000758	CSF2	colony stimulating factor 2 (granulocyte-macrophage)	6.67304	6.44808	6.59669	6.4557	5.57741	5.27775	5.44398	5.41935	1.02296e-05	5.44705e-05	1.11376
8120602	NM_024576	OGFRL1	opioid growth factor receptor-like 1	11.2822	11.4756	11.2986	11.6195	10.1977	10.3679	10.2356	10.4217	2.46995e-05	0.00010062	1.11321
8160546	NM_152570	LINGO2	leucine rich repeat and Ig domain containing 2	5.51367	5.98859	5.0417	5.87839	4.34054	4.64543	4.44851	4.53742	0.00249119	0.00362859	1.11261
8115562	NM_144726	RNF145	ring finger protein 145	9.75808	9.84305	9.74323	9.89021	8.52647	8.77229	8.80173	8.68956	4.30226e-06	3.05031e-05	1.11113
7918026	NM_001439	EXTL2	exostosin-like glycosyltransferase 2	8.59733	8.54214	8.57548	8.66418	7.61712	7.46703	7.15966	7.69195	9.21883e-05	0.000265656	1.11084
7967255	NM_002956	CLIP1	CAP-GLY domain containing linker protein 1	9.7942	9.85159	9.7683	9.86901	8.63426	8.58633	8.80538	8.81584	2.20071e-06	1.97114e-05	1.11032
7996516	NM_015432	PLEKHG4	pleckstrin homology domain containing, family G (with RhoGef domain) member 4	7.1077	7.15949	7.00445	7.07367	6.32022	5.74218	6.15097	5.69437	0.000402275	0.000830137	1.10939
7942957	NM_007173	PRSS23	protease, serine, 23	7.93055	7.9958	7.92907	8.07532	6.72795	7.03374	6.8283	6.90748	5.25979e-06	3.4745e-05	1.10832
8114991	NM_024577	SH3TC2	SH3 domain and tetratricopeptide repeats 2	7.08411	6.842	6.8631	6.95808	5.75635	6.04131	5.6456	5.87531	3.44608e-05	0.0001271	1.10718
7933204	NM_007021	C10orf10	chromosome 10 open reading frame 10	7.37454	7.23913	7.36507	6.9613	6.17357	5.5597	6.33293	6.44595	0.00236259	0.00347644	1.10697
8029530	NM_000041	APOE	apolipoprotein E	8.675	8.33365	8.3057	8.14513	7.37799	7.34232	7.24166	7.07076	0.000149879	0.000381708	1.10669
8157105	NM_021224	ZNF462	zinc finger protein 462	9.84109	10.0841	9.95222	10.0501	8.85544	8.688	8.95407	9.00338	1.59434e-05	7.40893e-05	1.10665
8141425	NM_005641	TAF6	TAF6 RNA polymerase II, TATA box binding protein (TBP)-associated factor, 80kDa	8.4172	8.71513	8.40315	8.59667	7.39781	7.31315	7.54376	7.45144	1.67851e-05	7.69194e-05	1.1065
8030630	NM_007121	NR1H2	nuclear receptor subfamily 1, group H, member 2	8.32687	8.40271	8.26008	8.2946	7.20446	7.11915	7.24592	7.29242	4.2584e-07	7.13064e-06	1.10558
8055688	NM_005168	RND3	Rho family GTPase 3	11.1679	11.1718	11.2644	11.198	10.1473	10.2466	9.85313	10.1338	1.49906e-05	7.1037e-05	1.10535
7903092	NM_001024948	FNBP1L	formin binding protein 1-like	10.0785	10.1547	10.2052	10.1472	9.05169	9.07856	8.9502	9.08607	1.66613e-07	4.20935e-06	1.10481
8064100	NM_024299	PPDPF	pancreatic progenitor cell differentiation and proliferation factor homolog (zebrafish)	9.50146	9.53368	9.60379	9.43216	8.44696	8.42097	8.50915	8.27694	1.77687e-06	1.74931e-05	1.10427
7964484	NM_001478	B4GALNT1	beta-1,4-N-acetyl-galactosaminyl transferase 1	8.42475	8.69829	8.45815	8.57347	7.47456	7.4303	7.40099	7.43192	2.39235e-06	2.07399e-05	1.10422
8060339	NM_024958	NRSN2	neurensin 2	8.82703	9.10564	8.80626	9.00238	7.89401	7.76246	7.92437	7.74389	1.28886e-05	6.41487e-05	1.10415
8118076	NM_014068	PSORS1C1	psoriasis susceptibility 1 candidate 1	6.57516	6.67044	6.66467	6.89066	5.5589	5.75334	5.67701	5.39634	3.83747e-05	0.00013799	1.10383
7953892	NM_016523	KLRF1	killer cell lectin-like receptor subfamily F, member 1	4.41183	5.12618	4.64646	5.25544	3.75269	3.82311	3.86127	3.58917	0.00180309	0.00278434	1.10342
7992795	NM_024339	THOC6	THO complex 6 homolog (Drosophila)	10.5132	10.4122	10.3759	10.4182	9.40267	9.24345	9.33865	9.32146	2.62946e-07	5.55942e-06	1.10331
8116649	NM_001069	TUBB2A	tubulin, beta 2A class IIa	9.61032	9.34988	9.46408	9.29415	8.35224	8.475	8.24517	8.23354	1.75997e-05	7.93949e-05	1.10312
8116653	NM_001069	TUBB2A	tubulin, beta 2A class IIa	9.61032	9.34988	9.46408	9.29415	8.35224	8.475	8.24517	8.23354	1.75997e-05	7.93949e-05	1.10312
8064407	NM_001029871	RSPO4	R-spondin 4	7.86415	7.93177	7.70767	7.88826	6.8801	6.77814	6.86196	6.46028	5.42991e-05	0.000179116	1.10285
7953291	NM_001769	CD9	CD9 molecule	10.7162	10.7168	10.8935	10.7705	9.55055	9.62478	9.59466	9.91596	2.15102e-05	9.13446e-05	1.10276
7899153	NM_031286	SH3BGRL3	SH3 domain binding glutamic acid-rich protein like 3	9.09989	9.13518	9.30402	9.37811	8.5074	8.13594	8.08639	7.77806	0.000521938	0.00102116	1.10235
8180272	NM_031848	PCDHA6	protocadherin alpha 6	7.74359	7.90283	7.58644	7.74336	6.7235	6.66603	6.68014	6.50043	9.82657e-06	5.29554e-05	1.10153
8007931	NM_000212	ITGB3	integrin, beta 3 (platelet glycoprotein IIIa, antigen CD61)	6.26736	6.55985	6.55337	6.60304	5.2436	5.31319	5.65976	5.36271	9.2937e-05	0.000267313	1.10109
8115234	NM_001155	ANXA6	annexin A6	11.9209	11.7239	11.8555	11.6889	10.8618	10.7631	10.5602	10.6022	1.7063e-05	7.76768e-05	1.10052
8121076	NM_006813	PNRC1	proline-rich nuclear receptor coactivator 1	10.0643	10.1853	10.1962	10.1969	9.10789	9.0347	9.12368	8.97541	4.03485e-07	6.93552e-06	1.10023
8040340	NM_145693	LPIN1	lipin 1	8.66646	8.70044	8.65548	8.65952	7.65406	7.31402	7.66583	7.65039	1.44126e-05	6.91066e-05	1.0994
7970831	NM_007106	UBL3	ubiquitin-like 3	8.70824	8.58672	8.60773	8.53876	7.51573	7.5064	7.47372	7.5511	1.33741e-07	3.71168e-06	1.09863
7969677	NM_144778	MBNL2	muscleblind-like splicing regulator 2	10.6873	10.735	10.7871	10.6812	9.56735	9.60286	9.64108	9.68596	7.47331e-08	2.62488e-06	1.09837
7986359	NM_000875	IGF1R	insulin-like growth factor 1 receptor	9.24249	9.346	9.30824	9.47429	8.21778	7.86583	8.46957	8.42468	0.00028577	0.000634092	1.09829
7942596	NM_001235	SERPINH1	serpin peptidase inhibitor, clade H (heat shock protein 47), member 1, (collagen binding protein 1)	9.23752	9.19985	9.05167	9.153	8.14344	8.0467	8.02299	8.03716	4.94464e-07	7.86322e-06	1.09794
7950501	NM_030792	GDPD5	glycerophosphodiester phosphodiesterase domain containing 5	8.1906	8.20298	8.08741	8.15006	7.08873	7.39793	7.0579	6.6955	0.000287286	0.000636367	1.09775
8180341	NM_018890	RAC1	ras-related C3 botulinum toxin substrate 1 (rho family, small GTP binding protein Rac1)	11.6232	11.7612	11.6409	11.7361	10.5763	10.4244	10.7618	10.6134	7.6671e-06	4.47138e-05	1.09639
7927694	NM_032439	PHYHIPL	phytanoyl-CoA 2-hydroxylase interacting protein-like	5.80267	5.74435	5.73182	5.94497	4.78924	4.71613	4.71823	4.62046	1.72289e-06	1.71247e-05	1.09494
7984112	NM_016530	RAB8B	RAB8B, member RAS oncogene family	9.68663	9.75826	9.65308	9.7752	8.65006	8.69701	8.44556	8.70126	3.35214e-06	2.58297e-05	1.09482
8031768	NM_001010879	ZIK1	zinc finger protein interacting with K protein 1	6.44532	6.27989	6.42588	6.42821	5.43169	5.03094	5.37751	5.36021	3.22342e-05	0.000121481	1.09474
8137310	NM_007188	ABCB8	ATP-binding cassette, sub-family B (MDR/TAP), member 8	8.42686	8.50968	8.41188	8.39882	7.39825	7.17967	7.44731	7.3478	2.41352e-06	2.08815e-05	1.09355
8097461	NM_012118	CCRN4L	CCR4 carbon catabolite repression 4-like (S. cerevisiae)	9.38372	9.45452	9.43364	9.5167	8.34232	8.30959	8.48913	8.27401	1.01428e-06	1.23665e-05	1.09338
8153776	NM_183057	VPS28	vacuolar protein sorting 28 homolog (S. cerevisiae)	9.81803	9.86506	9.70843	9.90666	8.71311	8.65543	8.70833	8.84888	1.66076e-06	1.67471e-05	1.09311
8159900	NM_152629	GLIS3	GLIS family zinc finger 3	6.91305	7.52105	7.19076	7.48394	6.17389	6.19428	6.21005	6.15973	0.000257418	0.00058407	1.09271
7944011	NM_015523	REXO2	REX2, RNA exonuclease 2 homolog (S. cerevisiae)	9.91854	9.84383	10.1138	9.79375	8.78101	8.83851	8.79405	8.88593	6.16331e-06	3.87015e-05	1.09261
8027292	NM_133473	ZNF431	zinc finger protein 431	8.63799	9.02036	8.70789	9.07787	7.63561	7.35093	7.83062	8.25731	0.00253413	0.00368038	1.09241
8017675	NR_024386	PLEKHM1P	pleckstrin homology domain containing, family M (with RUN domain) member 1 pseudogene	9.64333	9.69311	9.62442	9.65941	8.6792	8.37618	8.55409	8.64315	4.10549e-06	2.94952e-05	1.09191
8153727	NM_013291	CPSF1	cleavage and polyadenylation specific factor 1, 160kDa	8.94272	8.97721	8.94091	9.00701	7.91421	7.67104	7.91738	7.9978	5.38028e-06	3.52521e-05	1.09185
8053901	NM_017849	TMEM127	transmembrane protein 127	9.34743	9.64564	9.4368	9.37106	8.36344	8.41589	8.31853	8.33581	4.8125e-06	3.28277e-05	1.09182
8076046	NM_012264	TMEM184B	transmembrane protein 184B	9.57397	9.61577	9.5773	9.64442	8.52937	8.08704	8.6506	8.77874	0.000359339	0.000761306	1.09143
8025199	NM_006702	PNPLA6	patatin-like phospholipase domain containing 6	8.07527	8.25529	8.09722	8.10419	7.20939	7.0488	6.99343	6.91725	6.31186e-06	3.92073e-05	1.09077
8135734	NM_024913	CPED1	cadherin-like and PC-esterase domain containing 1	5.89895	6.28229	5.92207	6.27914	4.92314	5.15646	4.97997	4.96154	9.445e-05	0.000270824	1.09033
8062293	NM_014902	DLGAP4	discs, large (Drosophila) homolog-associated protein 4	8.50427	8.43752	8.42139	8.17764	7.33758	7.44428	7.19032	7.20951	2.32252e-05	9.62004e-05	1.08978
7975136	NM_178155	FUT8	fucosyltransferase 8 (alpha (1,6) fucosyltransferase)	9.78925	9.85552	9.76245	9.88343	8.6692	8.64838	8.89768	8.71965	2.46474e-06	2.11552e-05	1.08893
8113981	NM_004199	P4HA2	prolyl 4-hydroxylase, alpha polypeptide II	9.52839	9.42862	9.57962	9.28909	8.53686	8.20242	8.42945	8.30236	3.00707e-05	0.000116127	1.08866
8134712	NM_004722	AP4M1	adaptor-related protein complex 4, mu 1 subunit	8.01217	7.84177	8.02169	7.79671	7.0301	6.74609	6.69747	6.84476	2.42651e-05	9.93646e-05	1.08848
8090509	NM_004637	RAB7A	RAB7A, member RAS oncogene family	6.58756	7.14414	6.62566	7.26559	5.93783	5.57343	5.81848	5.93995	0.00139516	0.00226735	1.08832
7977249	NM_022489	INF2	inverted formin, FH2 and WH2 domain containing	8.0442	8.01643	8.144	7.89652	6.98752	6.94728	7.12685	6.69254	4.48236e-05	0.000155664	1.08674
8013753	NM_031934	RAB34	RAB34, member RAS oncogene family	9.01158	9.0071	8.95264	8.9401	7.9235	7.95359	7.8454	7.84323	5.61805e-08	2.18555e-06	1.08643
8090018	NM_031458	PARP9	poly (ADP-ribose) polymerase family, member 9	5.95291	6.26273	5.97783	6.36863	4.99467	4.91692	5.11635	5.19412	0.000105359	0.000293217	1.08501
8037467	NM_014518	ZNF229	zinc finger protein 229	6.27135	6.44481	6.13556	6.50113	5.43053	5.04598	5.3828	5.1557	0.000122981	0.000329318	1.08446
8019939	NM_170695	TGIF1	TGFB-induced factor homeobox 1	7.60667	7.63884	7.51383	7.52071	5.97906	6.83497	6.61452	6.51445	0.00107029	0.00182617	1.08426
8148808	NM_032450	MROH1	maestro heat-like repeat family member 1	7.89089	8.29157	7.75858	7.80477	6.87605	6.74013	7.13248	6.66067	0.000497683	0.000983568	1.08412
8030470	NM_014203	AP2A1	adaptor-related protein complex 2, alpha 1 subunit	9.49163	9.47198	9.47224	9.35287	8.41053	8.27812	8.33044	8.43442	4.98734e-07	7.91773e-06	1.0838
7990971	NM_030594	CPEB1	cytoplasmic polyadenylation element binding protein 1	6.95925	7.20804	7.0554	7.08709	5.9509	5.91975	6.01754	6.09465	2.8237e-06	2.30458e-05	1.08174
7938370	NM_015055	SWAP70	SWAP switching B-cell complex 70kDa subunit	9.74055	9.77473	9.68959	9.87757	8.67841	8.63523	8.63679	8.81037	1.43533e-06	1.54512e-05	1.08041
8092750	NM_021032	FGF12	fibroblast growth factor 12	6.37883	6.51803	6.53925	6.7516	5.30956	5.7927	5.36142	5.40537	0.000199083	0.000477301	1.07966
7958565	NM_000431	MVK	mevalonate kinase	7.95697	8.12177	7.98702	7.98539	6.99136	6.92507	6.70649	7.11076	2.39474e-05	9.8468e-05	1.07937
7937443	NM_022772	EPS8L2	EPS8-like 2	8.04365	7.91308	8.02499	7.98549	7.10629	6.88413	6.97319	6.69037	2.31643e-05	9.60403e-05	1.07831
7990151	NM_182470	PKM	pyruvate kinase, muscle	12.8911	12.7953	12.868	12.6729	11.7476	11.6071	11.83	11.7298	3.75366e-06	2.77712e-05	1.0782
8045208	NM_001083538	POTEE	POTE ankyrin domain family, member E	9.42583	9.43216	9.43503	9.34927	8.34473	8.27994	8.5044	8.2117	3.36541e-06	2.59012e-05	1.07538
8178090	NM_001040437	C6orf48	chromosome 6 open reading frame 48	10.6239	10.3889	10.5881	10.2086	9.53702	9.4545	9.24124	9.28137	0.000104606	0.000291747	1.07385
8179326	NM_001040437	C6orf48	chromosome 6 open reading frame 48	10.6239	10.3889	10.5881	10.2086	9.53702	9.4545	9.24124	9.28137	0.000104606	0.000291747	1.07385
8108080	NM_015288	PHF15	PHD finger protein 15	8.05628	7.80367	7.92407	7.76585	6.91192	6.7873	6.95498	6.60238	4.50527e-05	0.000156334	1.07332
8124088	NM_022113	KIF13A	kinesin family member 13A	8.45917	8.71134	8.54888	8.62175	7.50984	7.44586	7.46033	7.63237	4.21309e-06	2.99857e-05	1.07319
8093494	NM_175918	CRIPAK	cysteine-rich PAK1 inhibitor	7.90455	7.99858	8.06431	7.87905	6.91204	6.73788	7.1149	6.79128	2.70964e-05	0.000107553	1.0726
7982812	NM_001077268	ZFYVE19	zinc finger, FYVE domain containing 19	7.88487	7.88388	8.00168	7.88022	6.89049	6.89902	6.82241	6.75067	3.86132e-07	6.81809e-06	1.07202
8020149	NM_003826	NAPG	N-ethylmaleimide-sensitive factor attachment protein, gamma	10.1125	10.0319	10.0052	9.93784	8.85878	8.88757	9.01713	9.03828	1.60031e-06	1.65003e-05	1.07142
8038213	NM_016246	HSD17B14	hydroxysteroid (17-beta) dehydrogenase 14	7.58577	7.53278	7.42703	7.42724	6.48016	6.50959	6.21187	6.48587	1.12952e-05	5.82075e-05	1.07133
8030049	NM_017457	CYTH2	cytohesin 2	9.97095	9.97708	10.0497	9.85721	8.91126	8.82555	8.91755	8.91548	3.90831e-07	6.86366e-06	1.07129
8134890	NM_005273	GNB2	guanine nucleotide binding protein (G protein), beta polypeptide 2	10.2314	10.0477	10.1385	9.93928	9.09392	9.17057	8.88152	8.92595	2.5162e-05	0.000102038	1.07123
7948987	NM_007069	PLA2G16	phospholipase A2, group XVI	8.11686	7.62112	8.07195	7.60936	6.68671	6.83836	6.98686	6.62342	0.000552763	0.00106847	1.07099
8047381	NM_003879	CFLAR	CASP8 and FADD-like apoptosis regulator	7.78592	7.99546	7.91864	8.05564	6.83551	6.79195	6.75041	7.09504	3.28477e-05	0.000123077	1.07069
8148276	NM_152412	ZNF572	zinc finger protein 572	5.56954	6.30913	5.68271	5.89884	4.87144	5.01399	4.73071	4.56351	0.00131855	0.00216702	1.07014
7970844	NM_001014380	KATNAL1	katanin p60 subunit A-like 1	8.89996	9.06246	8.90784	9.10635	7.97132	7.77356	8.00109	7.95288	6.72916e-06	4.0947e-05	1.06944
7964119	NM_005419	STAT2	signal transducer and activator of transcription 2, 113kDa	8.06325	8.30086	8.16175	8.42455	7.30343	6.6296	7.36536	7.37552	0.00161872	0.00255255	1.06913
8141882	NR_027768	DPY19L2P2	dpy-19-like 2 pseudogene 2 (C. elegans)	5.49933	6.1581	5.49433	6.08592	4.45514	4.84929	4.69537	4.96187	0.00233427	0.00344141	1.069
8180359	NM_001002811	PDE4DIP	phosphodiesterase 4D interacting protein	10.9939	11.1839	11.0111	11.1247	9.94461	10.0555	10.1136	9.92532	2.9543e-06	2.36939e-05	1.06864
8017212	NM_032582	USP32	ubiquitin specific peptidase 32	10.2559	10.4635	10.3373	10.4866	9.25313	9.26925	9.36495	9.38428	2.86082e-06	2.32693e-05	1.06792
7927799	NM_001001330	REEP3	receptor accessory protein 3	8.93781	9.16649	9.10827	9.35157	7.80969	8.12762	8.01801	8.33765	0.000257314	0.000583948	1.06779
7930311	NM_183239	GSTO2	glutathione S-transferase omega 2	8.51123	8.15483	8.46695	8.46108	7.24687	7.35553	7.3446	7.37706	1.77601e-05	7.99793e-05	1.06751
8180343	NM_198829	NA	NA	11.6244	11.7562	11.5946	11.7086	10.5939	10.4205	10.7678	10.6316	1.14871e-05	5.89153e-05	1.0675
8180342	NM_006908	RAC1	ras-related C3 botulinum toxin substrate 1 (rho family, small GTP binding protein Rac1)	11.6199	11.7535	11.6316	11.712	10.6074	10.4369	10.7702	10.6327	7.85902e-06	4.53101e-05	1.06741
8148783	NM_032450	MROH1	maestro heat-like repeat family member 1	8.68341	8.74759	8.60974	8.77828	7.57391	7.88519	7.56047	7.52994	2.33392e-05	9.65184e-05	1.06738
7996185	NM_002428	MMP15	matrix metallopeptidase 15 (membrane-inserted)	7.38479	7.25737	7.26076	7.05254	6.14482	6.25056	6.2273	6.06431	1.16622e-05	5.94137e-05	1.06711
8125752	NM_015921	CUTA	cutA divalent cation tolerance homolog (E. coli)	10.5145	10.3299	10.4594	10.3315	9.29199	9.28256	9.39089	9.4028	1.39966e-06	1.52057e-05	1.06674
7998381	NM_022773	LMF1	lipase maturation factor 1	8.73855	8.70451	8.67842	8.77172	7.75664	7.64986	7.65506	7.56512	3.29557e-07	6.30532e-06	1.06663
7949650	NM_003793	CTSF	cathepsin F	7.94204	7.86287	7.98348	7.83264	6.83995	6.65844	7.01774	6.83845	1.19994e-05	6.07732e-05	1.06661
8141560	NM_003227	TFR2	transferrin receptor 2	6.81359	6.76282	6.58899	6.6762	5.68386	5.59249	5.70057	5.5995	1.477e-06	1.57165e-05	1.06629
7913667	NM_000403	GALE	UDP-galactose-4-epimerase	8.38114	8.33719	8.22694	8.23744	7.33456	7.27651	7.20938	7.09975	2.72925e-06	2.2545e-05	1.06563
8044462	NM_153712	TTL	tubulin tyrosine ligase	10.711	10.7832	10.7173	10.7393	9.61642	9.68584	9.69775	9.69128	1.12443e-08	9.02237e-07	1.06489
7917338	NM_003921	BCL10	B-cell CLL/lymphoma 10	9.58964	9.52941	9.56459	9.54988	8.61773	8.21879	8.61761	8.52005	3.06207e-05	0.000117484	1.06483
7928800	NM_018999	CCSER2	coiled-coil serine-rich protein 2	9.85622	9.98005	9.95188	10.0285	8.86266	8.89663	8.90379	8.89525	1.24814e-07	3.59211e-06	1.06458
7903478	NM_001143989	NBPF4	neuroblastoma breakpoint family, member 4	6.80485	7.17371	6.96531	7.27019	5.93692	5.99298	5.94982	6.07646	6.67569e-05	0.000208684	1.06447
8122457	NM_003764	STX11	syntaxin 11	8.02834	8.46583	8.07849	8.332	7.15313	7.38067	7.0526	7.06153	0.000171161	0.000423752	1.06418
7984771	NM_005576	LOXL1	lysyl oxidase-like 1	9.22624	8.97106	9.33566	9.08987	7.91741	8.16862	8.28204	7.99828	8.73634e-05	0.000255593	1.06412
8122554	NM_006834	RAB32	RAB32, member RAS oncogene family	9.59443	9.4093	9.56665	9.35244	8.39978	8.42111	8.46739	8.3857	2.4616e-06	2.11423e-05	1.06221
8040211	NM_003597	KLF11	Kruppel-like factor 11	8.87337	8.79408	8.95378	8.78773	7.52299	7.79136	7.89042	7.95906	4.9872e-05	0.000167931	1.06128
8109086	NM_000024	ADRB2	adrenoceptor beta 2, surface	7.70802	7.52486	7.68039	7.42864	6.64765	6.53436	6.72184	6.19332	0.000217197	0.000511259	1.06119
8015214	NM_033184	KRTAP2-4	keratin associated protein 2-4	8.96745	8.71311	8.93933	8.56907	7.77658	8.02361	7.71284	7.43409	0.000461764	0.000925416	1.06046
8019574	NM_033184	KRTAP2-4	keratin associated protein 2-4	8.96745	8.71311	8.93933	8.56907	7.77658	8.02361	7.71284	7.43409	0.000461764	0.000925416	1.06046
8032871	NM_139159	DPP9	dipeptidyl-peptidase 9	8.24473	8.48673	8.24376	8.43329	7.27848	6.99108	7.5038	7.3951	0.000162208	0.000405928	1.06001
7928695	NM_032333	FAM213A	family with sequence similarity 213, member A	8.88751	8.72074	9.015	8.81036	7.75492	7.80834	7.99461	7.63664	3.52279e-05	0.000129267	1.05978
8024792	NM_005755	EBI3	Epstein-Barr virus induced 3	7.56407	7.33912	7.18761	7.65469	6.55233	6.303	6.55033	6.10156	0.000433973	0.000880897	1.05957
8118086	NM_007109	TCF19	transcription factor 19	8.99218	9.04904	9.12785	8.98208	7.93148	7.96178	8.01878	8.00205	1.60263e-07	4.11461e-06	1.05927
8177947	NM_007109	TCF19	transcription factor 19	8.99218	9.04904	9.12785	8.98208	7.93148	7.96178	8.01878	8.00205	1.60263e-07	4.11461e-06	1.05927
8107909	NM_003059	SLC22A4	solute carrier family 22 (organic cation/ergothioneine transporter), member 4	7.03832	7.09004	6.80255	7.06545	5.8376	6.15159	5.97181	5.79927	5.12304e-05	0.000171216	1.05902
7939368	NM_017583	TRIM44	tripartite motif containing 44	8.97112	9.00946	9.01627	9.07941	7.81166	7.76326	8.02979	8.23583	7.55082e-05	0.000229029	1.05893
7938154	NM_004517	ILK	integrin-linked kinase	9.93229	9.81785	9.87284	9.80002	8.83977	8.80346	8.81527	8.72909	1.45806e-07	3.93052e-06	1.05885
7910022	NM_152495	CNIH3	cornichon homolog 3 (Drosophila)	7.04001	6.91256	6.99675	6.84379	5.91775	6.0179	5.95721	5.6654	2.13573e-05	9.09337e-05	1.05871
8143766	NM_001164458	ACTR3C	ARP3 actin-related protein 3 homolog C (yeast)	6.41068	7.21227	6.28817	7.18787	5.64408	5.47812	5.88164	5.86106	0.00714379	0.00872478	1.05852
7942342	NM_001567	INPPL1	inositol polyphosphate phosphatase-like 1	8.94201	9.12992	8.90183	9.10342	8.06498	7.70631	8.07728	7.99789	5.24387e-05	0.000174355	1.05768
8120654	NM_001160133	KCNQ5	potassium voltage-gated channel, KQT-like subfamily, member 5	8.81699	9.05626	8.77538	9.17446	7.71624	7.92198	7.97208	7.98276	8.88239e-05	0.000258582	1.05751
8151101	NM_001080416	MYBL1	v-myb myeloblastosis viral oncogene homolog (avian)-like 1	9.08949	9.74519	9.26587	9.82295	8.28841	8.47433	8.43682	8.49737	0.00126321	0.00209065	1.05664
8078461	NM_012157	FBXL2	F-box and leucine-rich repeat protein 2	8.44674	8.63976	8.55845	8.7158	7.57848	7.34272	7.64752	7.56674	1.99063e-05	8.67798e-05	1.05632
8116921	NM_001955	EDN1	endothelin 1	6.45186	6.66745	6.59323	6.79604	5.49049	5.48889	5.60161	5.70469	2.10624e-05	9.00989e-05	1.05573
8131406	NM_018890	RAC1	ras-related C3 botulinum toxin substrate 1 (rho family, small GTP binding protein Rac1)	8.68218	8.77727	8.41205	8.67513	7.67613	7.25837	7.52887	7.8614	0.000404513	0.000833422	1.05547
7900792	NM_002840	PTPRF	protein tyrosine phosphatase, receptor type, F	9.47938	9.56428	9.53578	9.57428	8.42052	8.43972	8.61609	8.45555	7.14258e-07	9.98616e-06	1.05546
8049657	NM_001040445	ASB1	ankyrin repeat and SOCS box containing 1	8.46341	8.58231	8.67034	8.41624	7.55932	7.26906	7.5946	7.49066	2.81537e-05	0.000110442	1.05466
8082688	NM_015268	DNAJC13	DnaJ (Hsp40) homolog, subfamily C, member 13	10.3904	10.5818	10.531	10.6461	9.36049	9.43641	9.57106	9.56315	7.83188e-06	4.52543e-05	1.05454
8012883	NM_006042	HS3ST3A1	heparan sulfate (glucosamine) 3-O-sulfotransferase 3A1	8.83313	8.99984	8.94005	8.86276	7.74404	7.87894	7.87822	7.91693	1.10858e-06	1.31843e-05	1.05441
7902512	NM_007034	DNAJB4	DnaJ (Hsp40) homolog, subfamily B, member 4	9.08261	9.05404	9.20127	9.05159	8.05805	8.07256	8.08024	7.96276	3.7873e-07	6.75178e-06	1.05398
7992646	NM_001694	ATP6V0C	ATPase, H+ transporting, lysosomal 16kDa, V0 subunit c	11.6623	11.7329	11.7297	11.6936	10.5841	10.466	10.7514	10.8042	1.13263e-05	5.83044e-05	1.0532
7931379	NM_002412	MGMT	O-6-methylguanine-DNA methyltransferase	8.06645	7.79125	8.01254	7.70851	7.23908	6.79971	6.7116	6.61878	0.000633797	0.00119481	1.05239
8156199	NM_004938	DAPK1	death-associated protein kinase 1	9.07331	9.38216	9.35924	9.16587	8.1588	8.17032	8.18294	8.26164	1.07699e-05	5.63519e-05	1.05172
7965812	NM_024312	GNPTAB	N-acetylglucosamine-1-phosphate transferase, alpha and beta subunits	9.37042	9.69134	9.5022	9.72708	8.3496	8.50753	8.64321	8.58577	5.7765e-05	0.000187589	1.05123
8035980	NM_033103	RHPN2	rhophilin, Rho GTPase binding protein 2	9.35606	9.45877	9.32395	9.36319	8.29756	8.30121	8.4353	8.26312	5.78695e-07	8.76192e-06	1.0512
8018107	NM_012121	CDC42EP4	CDC42 effector protein (Rho GTPase binding) 4	7.60637	7.58565	7.71612	7.7332	6.9204	6.52512	6.48426	6.50691	7.75176e-05	0.000233247	1.05116
8140814	NM_018843	SLC25A40	solute carrier family 25, member 40	9.77738	10.1609	9.92187	10.3553	8.89656	8.95076	8.84994	9.32036	0.000753811	0.00137139	1.04945
8025142	NM_001130955	ARHGEF18	Rho/Rac guanine nucleotide exchange factor (GEF) 18	8.46938	8.473	8.58185	8.47312	7.56614	7.19916	7.5284	7.50644	2.23384e-05	9.38469e-05	1.0493
8152280	NM_013437	LRP12	low density lipoprotein receptor-related protein 12	8.45788	8.5303	8.48705	8.60493	7.35037	7.44974	7.51963	7.56587	1.61813e-06	1.65588e-05	1.04864
7997942	NM_014427	CPNE7	copine VII	8.06769	7.90406	8.01369	7.86501	7.07319	6.9182	7.0073	6.6652	4.74115e-05	0.000161918	1.04664
8005707	NM_145109	MAP2K3	mitogen-activated protein kinase kinase 3	8.01135	8.06354	7.98071	8.03225	6.94834	6.7894	7.05981	7.1048	6.85859e-06	4.15957e-05	1.04637
8056005	NM_001105	ACVR1	activin A receptor, type I	8.01438	8.36253	8.09866	8.33535	7.19242	7.10012	7.19167	7.1431	2.3103e-05	9.59217e-05	1.0459
7977454	NM_001145442	POTEM	POTE ankyrin domain family, member M	10.0331	10.05	10.3015	9.9967	9.06149	8.91998	9.15711	9.06149	1.76632e-05	7.95706e-05	1.04532
8046461	NM_133646	ZAK	sterile alpha motif and leucine zipper containing kinase AZK	8.28927	8.51055	8.3374	8.52841	7.37353	7.14531	7.44651	7.51937	4.76879e-05	0.000162733	1.04523
7940996	NM_012094	PRDX5	peroxiredoxin 5	10.7033	10.4615	10.6436	10.4179	9.49355	9.485	9.48823	9.58039	7.18577e-06	4.29394e-05	1.04478
8165319	NM_018998	FBXW5	F-box and WD repeat domain containing 5	9.57653	9.54602	9.59136	9.23055	8.47189	8.54437	8.42422	8.32911	3.77772e-05	0.000136193	1.04372
8117034	NM_006877	GMPR	guanosine monophosphate reductase	7.63007	7.85963	7.81612	7.9231	6.80241	6.76992	6.64791	6.83432	8.60872e-06	4.81544e-05	1.04359
7949454	NM_002419	MAP3K11	mitogen-activated protein kinase kinase kinase 11	8.4164	8.61998	8.38112	8.52604	7.43946	7.4002	7.35083	7.57887	7.41459e-06	4.38e-05	1.04355
8153449	NM_032378	EEF1D	eukaryotic translation elongation factor 1 delta (guanine nucleotide exchange protein)	11.8905	11.5641	11.7219	11.4732	10.6991	10.5924	10.7078	10.4771	6.52026e-05	0.000205112	1.04331
7956524	NM_024779	PIP4K2C	phosphatidylinositol-5-phosphate 4-kinase, type II, gamma	8.35208	8.48383	8.30707	8.43118	7.17401	7.49568	7.08298	7.64829	0.000287238	0.000636367	1.0433
8149264	NM_024607	PPP1R3B	protein phosphatase 1, regulatory subunit 3B	7.79009	7.79595	7.42625	7.75748	6.69031	6.93631	6.6955	6.27487	0.000702406	0.00129551	1.04319
8028311	NM_021102	SPINT2	serine peptidase inhibitor, Kunitz type, 2	8.26129	8.16176	8.21845	8.09554	7.22603	7.37723	7.01327	6.94837	5.96916e-05	0.000192303	1.04304
8145136	NM_005605	PPP3CC	protein phosphatase 3, catalytic subunit, gamma isozyme	9.02812	9.03609	9.05714	9.18718	7.98407	7.95582	8.08736	8.10937	1.11843e-06	1.32395e-05	1.04298
8077450	NM_018184	ARL8B	ADP-ribosylation factor-like 8B	11.0365	11.2475	11.1872	11.2292	10.0579	10.1144	10.143	10.2139	1.87227e-06	1.80167e-05	1.04278
8083887	NM_005602	CLDN11	claudin 11	8.38163	8.31463	8.58655	8.22088	7.32677	7.50175	7.49829	7.00648	0.000300094	0.000659217	1.0426
8067233	NM_020182	PMEPA1	prostate transmembrane protein, androgen induced 1	8.10988	8.34556	8.22895	8.35335	7.19737	7.36454	7.11017	7.19813	1.109e-05	5.74682e-05	1.04188
8093360	NM_000283	PDE6B	phosphodiesterase 6B, cGMP-specific, rod, beta	7.12272	7.06008	7.31929	7.15262	6.18609	6.34233	6.11676	5.84205	0.00011866	0.000320596	1.04187
8070665	NM_173354	SIK1	salt-inducible kinase 1	8.24986	8.23562	8.17153	8.12454	7.29919	7.08551	7.18821	7.04254	3.50656e-06	2.67807e-05	1.04152
7917885	NM_001839	CNN3	calponin 3, acidic	12.0544	12.1457	12.1133	12.1585	11.1169	11.0326	11.174	10.9825	6.76189e-07	9.68373e-06	1.04149
8117243	NM_017640	LRRC16A	leucine rich repeat containing 16A	9.53964	9.72453	9.61839	9.76258	8.49756	8.6874	8.65949	8.63664	4.11723e-06	2.95632e-05	1.04101
8062041	NM_018677	ACSS2	acyl-CoA synthetase short-chain family member 2	8.92865	8.99185	8.9072	8.95716	7.91771	8.12204	7.8593	7.73225	1.62472e-05	7.50704e-05	1.03839
8007388	NM_173478	CNTD1	cyclin N-terminal domain containing 1	6.3473	6.25239	6.40211	6.61451	5.11688	5.41274	5.59404	5.34292	0.000165337	0.000412009	1.03743
8003824	NM_004937	CTNS	cystinosin, lysosomal cystine transporter	8.51624	8.7371	8.66218	8.79464	7.546	7.50763	7.86977	7.6405	5.02304e-05	0.000168831	1.03656
7918487	NM_024901	DENND2D	DENN/MADD domain containing 2D	6.89851	6.89507	6.9891	6.969	6.08508	5.97422	5.81476	5.73404	1.55344e-05	7.27364e-05	1.0359
8133459	NM_003388	CLIP2	CAP-GLY domain containing linker protein 2	7.62802	7.43559	7.30952	7.49955	6.30839	6.60989	6.5456	6.27029	7.2111e-05	0.00022105	1.03463
8029065	NM_000709	BCKDHA	branched chain keto acid dehydrogenase E1, alpha polypeptide	9.39485	9.6193	9.31134	9.40306	8.38488	8.12187	8.58371	8.50387	0.000137365	0.000357901	1.03355
7980146	NM_006432	NPC2	Niemann-Pick disease, type C2	11.6756	11.7236	11.6657	11.7726	10.7799	10.6783	10.5935	10.652	5.11508e-07	8.04541e-06	1.03341
8150356	NR_003129	RNF5P1	ring finger protein 5, E3 ubiquitin protein ligase pseudogene 1	8.65665	8.75547	8.72376	8.7593	7.71373	7.74571	7.58083	7.7231	4.02906e-07	6.93552e-06	1.03296
8145122	NM_001128431	SLC39A14	solute carrier family 39 (zinc transporter), member 14	10.3939	10.3812	10.4494	10.2778	9.34099	9.19488	9.53963	9.29865	1.39362e-05	6.75475e-05	1.03207
7928046	NM_012339	TSPAN15	tetraspanin 15	9.12401	9.10013	9.04682	8.94756	8.10007	8.03628	7.83612	8.11877	9.6236e-06	5.2285e-05	1.03182
8179228	NM_007109	TCF19	transcription factor 19	9.05323	9.07547	9.0884	9.01135	7.95915	7.99105	8.04805	8.10306	1.19166e-07	3.4785e-06	1.03179
8045210	NR_023391	CYP4F30P	cytochrome P450, family 4, subfamily F, polypeptide 30, pseudogene	6.01725	6.35624	6.42583	6.33822	5.21591	5.34992	5.20945	5.23806	4.02447e-05	0.000143295	1.03105
8124416	NM_003530	HIST1H3D	histone cluster 1, H3d	10.5176	10.4343	10.4548	10.4901	9.38229	9.70097	9.38504	9.30671	2.59138e-05	0.000104271	1.03042
8093230	NM_001145642	KIAA0226	KIAA0226	8.58585	8.51355	8.45885	8.37173	7.24015	7.61518	7.45796	7.49722	2.74176e-05	0.000108404	1.02987
8168045	NM_004429	EFNB1	ephrin-B1	8.86387	8.70888	8.75296	8.61938	7.84762	7.66883	7.57851	7.73135	1.00255e-05	5.3626e-05	1.0297
7898809	NM_017449	EPHB2	EPH receptor B2	8.01218	7.93437	7.84339	7.88485	6.88755	6.97894	6.91008	6.78209	1.44014e-06	1.54512e-05	1.02903
8082663	NR_027766	NUDT16P1	nudix (nucleoside diphosphate linked moiety X)-type motif 16 pseudogene 1	7.74346	7.61596	7.80394	7.49737	6.65316	6.74872	6.5589	6.58578	1.39363e-05	6.75475e-05	1.02854
7966878	NM_007174	CIT	citron (rho-interacting, serine/threonine kinase 21)	9.39793	9.46608	9.42647	9.48319	8.37383	8.27526	8.49173	8.52169	2.48904e-06	2.12512e-05	1.02779
7954729	NM_139241	FGD4	FYVE, RhoGEF and PH domain containing 4	6.85928	7.22473	6.96952	7.13023	5.78355	6.16911	5.95839	6.16177	0.000160277	0.000402261	1.02773
8040473	NM_004040	RHOB	ras homolog family member B	10.0658	9.78197	10.0641	9.67813	8.91652	8.88352	8.67696	9.00307	0.000144012	0.000370185	1.02748
7904702	NM_203458	NOTCH2NL	notch 2 N-terminal like	11.5259	11.7261	11.5973	11.8125	10.6712	10.4086	10.7299	10.7425	5.26442e-05	0.000174858	1.0274
7949518	NM_198897	FIBP	fibroblast growth factor (acidic) intracellular binding protein	10.1021	10.056	10.053	10.0144	9.09834	8.9833	8.96942	9.06663	1.26973e-07	3.62476e-06	1.02696
8005449	NM_000422	KRT17	keratin 17	7.739	7.37687	7.50391	7.42789	6.49301	6.68491	6.39528	6.36718	7.55092e-05	0.000229029	1.02682
8124742	NM_005275	GNL1	guanine nucleotide binding protein-like 1	8.42323	8.44121	8.41056	8.38537	7.22487	7.34428	7.47808	7.50766	4.56011e-06	3.16859e-05	1.02637
7944006	NM_016090	RBM7	RNA binding motif protein 7	8.43123	8.6719	8.59636	8.65754	7.66454	7.39163	7.38038	7.81517	0.000140948	0.000364332	1.02633
8010161	NM_006640	2014-09-09	septin 9	8.7005	8.86803	8.66214	8.84963	7.74886	7.74928	7.70929	7.77087	1.30927e-06	1.45436e-05	1.0255
7899627	NM_022164	TINAGL1	tubulointerstitial nephritis antigen-like 1	7.38706	7.34441	7.32062	7.27626	6.27052	6.6713	6.26842	6.01819	0.000294997	0.000650446	1.02498
8033233	NM_006087	TUBB4A	tubulin, beta 4A class IVa	8.33739	8.37017	8.26399	8.32762	7.41355	6.97977	7.33608	7.47739	0.000103463	0.000289482	1.02309
8177834	NM_024909	ATAT1	alpha tubulin acetyltransferase 1	6.89819	7.39513	6.97026	7.44923	6.15899	6.02683	6.21009	6.22809	0.000474992	0.000947656	1.0222
8160637	NM_001497	B4GALT1	UDP-Gal:betaGlcNAc beta 1,4- galactosyltransferase, polypeptide 1	9.15438	9.26408	9.248	9.39584	8.29583	8.08979	8.24634	8.34343	9.09835e-06	5.01359e-05	1.02173
8159692	NM_152285	ARRDC1	arrestin domain containing 1	8.05015	8.12712	8.00455	8.04542	7.20969	6.96443	6.79672	7.1726	5.03062e-05	0.000168968	1.02095
7967794	NM_015114	ANKLE2	ankyrin repeat and LEM domain containing 2	10.0828	10.1568	10.1548	10.1362	9.15318	9.0226	9.12047	9.15469	1.18464e-07	3.46582e-06	1.01988
8045321	NM_001099771	POTEF	POTE ankyrin domain family, member F	10.0348	10.2206	10.1303	10.1366	9.05162	8.96713	9.25175	9.1728	8.86507e-06	4.92482e-05	1.01975
8067040	NM_012340	NFATC2	nuclear factor of activated T-cells, cytoplasmic, calcineurin-dependent 2	7.38783	7.72693	7.33652	7.47314	6.51993	6.34527	6.40986	6.57728	5.62326e-05	0.000183717	1.01802
7970317	NM_007111	TFDP1	transcription factor Dp-1	11.0768	11.4322	11.1115	11.3742	10.1215	10.304	10.4305	10.068	0.000168551	0.000418381	1.0177
7986329	NM_021005	NR2F2	nuclear receptor subfamily 2, group F, member 2	8.83387	9.09546	8.63138	8.95595	7.79804	7.72052	7.87127	8.05608	0.000159652	0.000401003	1.01769
8153002	NM_001135242	NDRG1	N-myc downstream regulated 1	12.6419	12.5225	12.5688	12.4871	11.6438	11.3991	11.5928	11.5161	3.53541e-06	2.69376e-05	1.01712
8082974	NM_031913	ESYT3	extended synaptotagmin-like protein 3	6.75703	6.85169	6.87663	6.83957	6.00298	5.77231	5.80332	5.67885	8.50578e-06	4.77663e-05	1.01686
8038989	NM_198457	ZNF600	zinc finger protein 600	6.53978	6.56425	6.48783	6.55986	5.32523	5.65471	5.44819	5.66067	1.94414e-05	8.53347e-05	1.01573
8088458	NM_002012	FHIT	fragile histidine triad	8.11023	8.05521	7.98832	8.08281	7.27126	7.0132	6.92564	6.96431	1.71982e-05	7.81276e-05	1.01554
7998033	NM_014972	TCF25	transcription factor 25 (basic helix-loop-helix)	9.40827	9.30654	9.28514	9.18065	8.38189	8.16659	8.31423	8.25591	4.46481e-06	3.12912e-05	1.0155
8105506	NM_020928	ZSWIM6	zinc finger, SWIM-type containing 6	11.2176	11.3294	11.2997	11.291	10.1718	10.2247	10.4101	10.2699	1.87869e-06	1.80362e-05	1.0153
7998902	NM_017885	HCFC1R1	host cell factor C1 regulator 1 (XPO1 dependent)	8.25999	8.16697	8.18812	8.30819	7.0994	7.31813	7.21734	7.22731	1.70936e-06	1.70393e-05	1.01527
8055183	NM_017751	SMPD4	sphingomyelin phosphodiesterase 4, neutral membrane (neutral sphingomyelinase-3)	10.801	10.9234	10.8397	10.8645	9.88975	9.52884	9.96708	9.98364	8.93368e-05	0.000259492	1.01484
7966706	NM_015335	MED13L	mediator complex subunit 13-like	10.5127	10.6346	10.5084	10.6262	9.56784	9.36309	9.68931	9.60458	1.21877e-05	6.15585e-05	1.01425
8032608	NM_174983	MFSD12	major facilitator superfamily domain containing 12	8.73609	8.76356	8.71785	8.78723	7.81404	7.65698	7.77255	7.70455	1.86478e-07	4.55152e-06	1.01416
8085660	NM_206831	DPH3	DPH3, KTI11 homolog (S. cerevisiae)	10.806	10.8142	10.9156	10.7718	9.76381	10.0053	9.72934	9.75277	7.74513e-06	4.49787e-05	1.01409
8003332	NM_002461	MVD	mevalonate (diphospho) decarboxylase	9.07785	8.82807	9.13991	8.74204	7.81878	7.97675	8.07279	7.86446	0.000100333	0.000282944	1.01378
8151730	NM_004929	CALB1	calbindin 1, 28kDa	6.1782	6.48059	6.2099	6.16866	5.33117	5.05822	5.29008	5.30324	4.62232e-05	0.000159178	1.01366
8111772	NM_001343	DAB2	disabled homolog 2, mitogen-responsive phosphoprotein (Drosophila)	8.44659	8.6747	8.42254	8.71946	7.58564	7.41134	7.5238	7.68921	4.26905e-05	0.0001497	1.01332
8044450	NM_198581	ZC3H6	zinc finger CCCH-type containing 6	7.77098	8.0883	7.88832	8.05513	7.03008	6.75548	6.98714	6.97859	4.4076e-05	0.000153603	1.01286
8148737	NM_032272	MAF1	MAF1 homolog (S. cerevisiae)	9.19019	9.0502	9.15642	8.93956	8.07355	8.18856	8.06742	7.95756	9.28003e-06	5.08774e-05	1.01232
8010924	NM_001128159	VPS53	vacuolar protein sorting 53 homolog (S. cerevisiae)	9.9331	10.2173	9.88751	10.2451	9.1392	8.75155	9.18788	9.15803	0.000342325	0.000731528	1.01159
8103911	NM_002199	IRF2	interferon regulatory factor 2	8.10318	8.16162	8.239	8.1492	7.16384	7.00482	7.2144	7.22433	2.29833e-06	2.0195e-05	1.0114
8117435	NM_007047	BTN3A2	butyrophilin, subfamily 3, member A2	6.67779	6.99508	6.82136	6.95934	5.98316	5.75106	5.79219	5.88703	2.79482e-05	0.000109998	1.01003
7928291	NM_004273	CHST3	carbohydrate (chondroitin 6) sulfotransferase 3	8.14107	8.23507	8.13	8.17027	7.11654	7.22253	7.21705	7.08038	3.84028e-07	6.81389e-06	1.00998
7965094	NM_203394	E2F7	E2F transcription factor 7	10.1157	10.2335	10.2931	10.1736	9.08227	9.08912	9.27768	9.3275	9.67777e-06	5.24223e-05	1.00981
8176133	NM_000402	G6PD	glucose-6-phosphate dehydrogenase	8.99099	9.1393	9.06822	9.08617	8.11713	7.84848	8.08994	8.1905	1.54035e-05	7.2362e-05	1.00966
7967091	NM_139015	SPPL3	signal peptide peptidase like 3	9.35443	9.50804	9.29808	9.47704	8.40699	8.03776	8.50363	8.65161	0.000359865	0.000761974	1.0094
8138489	NM_018719	CDCA7L	cell division cycle associated 7-like	10.1291	10.0637	10.1228	10	9.21322	8.85862	9.11725	9.09021	1.635e-05	7.5411e-05	1.00906
7950671	NM_080491	GAB2	GRB2-associated binding protein 2	8.08731	8.13183	7.96415	8.14589	7.00779	7.12001	7.08803	7.07892	7.2124e-07	1.00422e-05	1.00861
8090098	NM_053025	MYLK	myosin light chain kinase	7.24633	7.36515	7.26413	7.28103	6.19833	6.37722	6.31145	6.23807	7.21364e-07	1.00422e-05	1.00789
8156278	NM_005226	S1PR3	sphingosine-1-phosphate receptor 3	7.62043	7.34537	7.67514	7.51013	6.71459	6.40994	6.50489	6.49179	4.80265e-05	0.000163244	1.00747
8105741	NM_001164664	MAST4	microtubule associated serine/threonine kinase family member 4	7.7739	7.87583	7.91782	7.94795	6.82922	6.89328	6.92525	6.83793	4.76104e-07	7.68439e-06	1.00745
7941460	NM_006442	DRAP1	DR1-associated protein 1 (negative cofactor 2 alpha)	10.8369	10.7602	10.7347	10.7687	9.82486	9.83853	9.69887	9.70877	3.98304e-07	6.92425e-06	1.00737
8055214	NR_023391	CYP4F30P	cytochrome P450, family 4, subfamily F, polypeptide 30, pseudogene	6.17145	6.41625	6.56128	6.36606	5.34148	5.43742	5.34881	5.35865	1.97912e-05	8.64569e-05	1.00717
7967331	NM_024667	VPS37B	vacuolar protein sorting 37 homolog B (S. cerevisiae)	8.28503	8.49827	8.43387	8.42894	7.50042	7.46808	7.35452	7.29498	4.94469e-06	3.31879e-05	1.00703
7938390	NM_001124	ADM	adrenomedullin	8.72364	8.72545	8.84145	8.62097	7.81743	7.90216	7.56207	7.60848	3.76954e-05	0.000135974	1.00534
8044258	NM_004987	LIMS1	LIM and senescent cell antigen-like domains 1	10.0053	9.87955	9.91599	10.0272	8.77704	8.9811	8.98067	9.07066	8.09144e-06	4.63e-05	1.00465
7937363	NM_007183	PKP3	plakophilin 3	7.46516	7.3643	7.41584	7.43402	6.68809	6.35251	6.26113	6.35945	4.4706e-05	0.000155422	1.00454
8113433	NM_001962	EFNA5	ephrin-A5	9.33722	9.7243	9.48164	9.77113	8.51076	8.53223	8.51207	8.74241	0.000136588	0.000356547	1.00421
7993807	NM_020422	TMEM159	transmembrane protein 159	7.57551	7.43482	7.52493	7.39755	6.49926	6.5202	6.43602	6.46147	5.24074e-07	8.14422e-06	1.00397
8117965	NM_024909	ATAT1	alpha tubulin acetyltransferase 1	7.0151	7.46738	7.14601	7.5038	6.27939	6.21085	6.33062	6.29635	0.000180353	0.000441449	1.00377
8179149	NM_024909	ATAT1	alpha tubulin acetyltransferase 1	7.0151	7.46738	7.14601	7.5038	6.27939	6.21085	6.33062	6.29635	0.000180353	0.000441449	1.00377
8052669	NM_014755	SERTAD2	SERTA domain containing 2	8.89661	9.23723	8.93165	9.19016	8.12072	7.86477	8.06669	8.1903	0.000107596	0.000297526	1.00329
8109283	NM_001543	NDST1	N-deacetylase/N-sulfotransferase (heparan glucosaminyl) 1	9.99702	10.3128	9.92518	10.2017	9.1675	8.73905	9.1562	9.3618	0.00073692	0.00134592	1.00304
8085412	NM_001134382	IQSEC1	IQ motif and Sec7 domain 1	8.28498	8.50449	8.3402	8.39316	7.477	7.2491	7.30093	7.48366	1.19273e-05	6.04805e-05	1.00303
8034034	NM_203500	KEAP1	kelch-like ECH-associated protein 1	8.5812	8.63738	8.42452	8.3899	7.69014	7.40725	7.42788	7.49603	2.73134e-05	0.000108104	1.00292
8125091	NM_006295	VARS	valyl-tRNA synthetase	9.87562	9.8516	9.9335	9.83878	8.89476	8.79999	8.94158	8.85363	1.59228e-07	4.11461e-06	1.00239
8178609	NM_006295	VARS	valyl-tRNA synthetase	9.87562	9.8516	9.9335	9.83878	8.89476	8.79999	8.94158	8.85363	1.59228e-07	4.11461e-06	1.00239
8148572	NM_002346	LY6E	lymphocyte antigen 6 complex, locus E	9.26166	9.21809	9.14602	9.1826	8.04163	8.02043	8.51375	8.22425	0.000137701	0.000358441	1.00208
8103508	NM_017923	2014-03-01	membrane-associated ring finger (C3HC4) 1, E3 ubiquitin protein ligase	6.60647	6.93286	6.78225	6.77562	5.79347	5.65176	5.7789	5.86559	1.60341e-05	7.44574e-05	1.00187
7949808	NM_004910	PITPNM1	phosphatidylinositol transfer protein, membrane-associated 1	7.88488	8.00756	8.00972	8.04527	6.909	6.97731	6.98595	7.06806	7.75314e-07	1.0407e-05	1.00178
8030171	NM_000146	FTL	ferritin, light polypeptide	11.5765	11.7718	11.5622	11.8235	10.789	10.6216	10.6274	10.6897	1.30075e-05	6.44928e-05	1.00158
8029580	NM_006509	RELB	v-rel reticuloendotheliosis viral oncogene homolog B	8.07666	7.9898	8.21372	7.98573	7.03319	7.08864	7.18373	6.95783	8.29455e-06	4.70218e-05	1.00063
8078196	NM_144633	KCNH8	potassium voltage-gated channel, subfamily H (eag-related), member 8	6.09255	6.1672	5.92797	6.21622	4.86201	5.3048	5.12315	5.11666	0.000103481	0.000289482	0.999329
8147057	NM_152284	CHMP4C	charged multivesicular body protein 4C	7.98225	8.02354	8.13336	8.0876	6.99806	7.05648	7.06717	7.10787	2.89592e-07	5.88287e-06	0.999293
8024900	NM_001048201	UHRF1	ubiquitin-like with PHD and ring finger domains 1	9.81361	9.79957	9.79648	9.67081	8.95732	8.70229	8.71814	8.70651	7.73861e-06	4.4976e-05	0.999054
7986383	NM_000875	IGF1R	insulin-like growth factor 1 receptor	8.03436	8.39655	8.1873	8.37727	7.04845	7.06902	7.51707	7.36661	0.000433899	0.000880884	0.998581
8137833	NM_013321	SNX8	sorting nexin 8	8.87305	8.71066	8.96335	8.83943	7.9768	7.7833	7.91973	7.71355	1.62236e-05	7.49881e-05	0.998277
8113790	NM_178450	2014-03-03	membrane-associated ring finger (C3HC4) 3, E3 ubiquitin protein ligase	9.54522	9.65671	9.42177	9.69717	8.63374	8.82129	8.74162	8.13277	0.000973455	0.00168918	0.997862
8137709	NM_182491	ZFAND2A	zinc finger, AN1-type domain 2A	10.9339	10.9739	10.9546	10.9479	10.0775	10.2789	9.58704	9.87851	0.000516387	0.00101237	0.997085
8032789	NM_017720	STAP2	signal transducing adaptor family member 2	6.92883	6.8778	6.96916	6.93233	6.12378	5.78995	5.80685	5.99999	1.93595e-05	8.5049e-05	0.996887
8098195	NM_006745	MSMO1	methylsterol monooxygenase 1	11.1337	11.252	11.1009	11.3829	10.0836	10.1214	10.246	10.431	6.28197e-05	0.000199456	0.996841
8093764	NM_198229	RGS12	regulator of G-protein signaling 12	7.4269	7.56004	7.36334	7.48084	6.54054	6.70789	6.22859	6.36808	0.000112854	0.000308316	0.996505
8015607	NM_139276	STAT3	signal transducer and activator of transcription 3 (acute-phase response factor)	9.95915	10.0988	9.99031	10.0728	8.99883	8.91164	9.0661	9.1592	3.67636e-06	2.74943e-05	0.996307
7921713	NM_016946	F11R	F11 receptor	8.47288	8.44635	8.2767	8.40954	7.48363	7.16681	7.5278	7.44338	3.74565e-05	0.000135219	0.99596
8039070	NM_182609	ZNF677	zinc finger protein 677	4.45947	4.9905	5.30333	5.38679	4.10583	4.11407	3.81195	4.12453	0.00427565	0.00569174	0.99593
8127544	NM_001402	EEF1A1	eukaryotic translation elongation factor 1 alpha 1	8.76692	8.57702	8.82701	8.72523	7.59431	7.34552	7.89135	8.08194	0.0011218	0.00189732	0.995763
7967685	NM_194356	STX2	syntaxin 2	10.0345	10.1299	10.1499	10.1573	9.02801	9.00784	9.21937	9.23496	5.82475e-06	3.69778e-05	0.995376
8170921	NM_017514	PLXNA3	plexin A3	8.25437	8.44064	8.14639	8.45992	7.44035	7.40135	7.32989	7.14858	5.76108e-05	0.000187228	0.995284
8086467	NM_018075	ANO10	anoctamin 10	9.45712	9.83475	9.74037	9.7261	8.7245	8.37931	8.81086	8.86257	0.000328755	0.00070837	0.995269
7973306	NM_022060	ABHD4	abhydrolase domain containing 4	8.33074	8.57162	8.37174	8.5162	7.51114	7.43586	7.40632	7.45601	3.53459e-06	2.69376e-05	0.995242
8098745	NM_001137608	ZNF732	zinc finger protein 732	6.1635	6.61783	6.0845	6.77124	5.2522	5.49287	5.42006	5.49207	0.001382	0.00225216	0.994964
8148694	NM_000837	GRINA	glutamate receptor, ionotropic, N-methyl D-aspartate-associated protein 1 (glutamate binding)	8.79669	8.97066	8.77412	8.95532	7.87262	7.71879	7.89658	8.02948	1.89781e-05	8.37475e-05	0.994828
8063835	NM_144703	LSM14B	LSM14B, SCD6 homolog B (S. cerevisiae)	7.63926	7.35445	7.71124	7.2148	6.49557	6.40834	6.40346	6.63465	0.00025073	0.000572919	0.994434
7932765	NM_173496	MPP7	membrane protein, palmitoylated 7 (MAGUK p55 subfamily member 7)	8.66893	8.9293	8.89129	8.87251	7.60695	7.90446	7.97358	7.90089	6.10405e-05	0.00019529	0.994035
8034344	NM_145233	ZNF625	zinc finger protein 625	5.70622	5.92457	5.59882	5.82975	4.61624	5.01765	4.65708	4.79301	0.000132896	0.000349585	0.993845
8002041	NM_004691	ATP6V0D1	ATPase, H+ transporting, lysosomal 38kDa, V0 subunit d1	11.0735	11.3267	11.0441	11.3157	10.1925	10.2031	10.2277	10.1617	1.35711e-05	6.65489e-05	0.993731
7992987	NM_001127204	HMOX2	heme oxygenase (decycling) 2	10.9844	10.7508	10.9833	10.7013	9.99308	9.88727	9.65895	9.90665	7.34386e-05	0.000224271	0.99343
8032576	NM_198969	AES	amino-terminal enhancer of split	9.39542	9.28007	9.32949	9.17351	8.31052	8.37046	8.25384	8.27133	1.56736e-06	1.63317e-05	0.993087
8172493	NM_004979	KCND1	potassium voltage-gated channel, Shal-related subfamily, member 1	6.96512	7.10717	6.78223	7.11706	6.11447	6.04489	5.87614	5.96828	4.1509e-05	0.000146868	0.991947
7910727	NM_001103	ACTN2	actinin, alpha 2	8.15263	8.41196	8.08404	8.39314	7.33518	7.0472	7.20364	7.48895	0.00021956	0.000515417	0.991699
8064766	NM_001134338	RNF24	ring finger protein 24	9.02838	9.09398	8.96602	8.97608	8.047	7.9086	8.09765	8.04955	1.09922e-06	1.31062e-05	0.990416
7979204	NM_006832	FERMT2	fermitin family member 2	10.5486	10.5918	10.5093	10.5709	9.54198	9.5134	9.49901	9.70836	1.287e-06	1.43795e-05	0.989495
7951535	NM_153705	KDELC2	KDEL (Lys-Asp-Glu-Leu) containing 2	9.91199	10.0507	10.0325	10.116	8.89609	8.88829	9.24459	9.12471	5.38272e-05	0.000177785	0.989391
8064790	NM_014737	RASSF2	Ras association (RalGDS/AF-6) domain family member 2	7.7941	7.92874	7.95336	7.93258	6.98855	6.87331	6.93149	6.86025	7.37244e-07	1.01173e-05	0.988797
8078252	NM_152653	UBE2E2	ubiquitin-conjugating enzyme E2E 2	9.67432	9.97196	9.69438	9.93725	8.81111	8.87801	8.72557	8.90889	3.03773e-05	0.000116883	0.988585
7899455	NM_001048183	PHACTR4	phosphatase and actin regulator 4	11.147	11.4237	11.0922	11.4947	10.2705	10.0749	10.3929	10.4659	0.000285291	0.000633355	0.98837
8042637	NM_001130978	DYSF	dysferlin, limb girdle muscular dystrophy 2B (autosomal recessive)	6.24168	6.50375	6.15086	6.39938	5.39225	5.14089	5.49823	5.31142	0.000101666	0.000285792	0.988218
7911155	NM_016002	SCCPDH	saccharopine dehydrogenase (putative)	10.1612	10.3874	10.434	10.3963	9.1725	9.48976	9.23924	9.52851	9.86322e-05	0.000279355	0.987204
8042576	NM_017567	NAGK	N-acetylglucosamine kinase	10.6544	10.5033	10.5545	10.4489	9.62853	9.73951	9.32332	9.52191	5.82735e-05	0.000188861	0.986954
8118945	NM_001171818	PPARD	peroxisome proliferator-activated receptor delta	8.41216	8.64094	8.41551	8.53872	7.52743	7.44968	7.54634	7.53647	2.97675e-06	2.38003e-05	0.986853
7949172	NM_004579	MAP4K2	mitogen-activated protein kinase kinase kinase kinase 2	7.79268	7.63208	7.45788	7.79103	6.67096	6.78589	6.619	6.65215	2.91488e-05	0.000113279	0.986417
7973530	NM_004563	PCK2	phosphoenolpyruvate carboxykinase 2 (mitochondrial)	8.9688	9.18201	9.06604	9.08019	8.18988	8.20113	7.99344	7.96901	1.28102e-05	6.39057e-05	0.985896
8091780	NM_001038628	B3GALNT1	beta-1,3-N-acetylgalactosaminyltransferase 1 (globoside blood group)	6.41625	6.42809	6.21934	6.30222	5.42796	5.55049	5.37521	5.07014	0.00012892	0.000341552	0.985526
7982878	NM_007236	CHP1	calcineurin-like EF-hand protein 1	11.2988	11.5986	11.3364	11.5658	10.4362	10.3366	10.4405	10.6446	6.51701e-05	0.000205096	0.985387
8166402	NM_004595	SMS	spermine synthase	10.1111	9.69273	10.0538	9.78034	8.89766	8.66659	9.07839	9.05396	0.000399899	0.000826356	0.985339
7963054	NM_006009	TUBA1A	tubulin, alpha 1a	10.943	10.9261	10.9744	10.9654	10.0484	9.87942	9.94832	9.99275	1.95984e-07	4.7213e-06	0.984991
8011293	NM_015229	CLUH	clustered mitochondria (cluA/CLU1) homolog	9.11724	9.23461	8.89844	9.23226	8.11589	7.83534	8.26473	8.32775	0.000339604	0.000727152	0.98471
8038163	NM_017805	RASIP1	Ras interacting protein 1	8.05303	7.61955	7.85138	7.3439	6.74924	6.77807	6.77252	6.63002	0.000752949	0.00137002	0.9845
8116384	NM_175062	RASGEF1C	RasGEF domain family, member 1C	7.67153	7.74343	7.66841	7.76423	6.88222	6.69637	6.72615	6.60884	4.01071e-06	2.89749e-05	0.983503
8054217	NM_005783	TXNDC9	thioredoxin domain containing 9	9.45039	9.46932	9.43527	9.64275	8.38658	8.35219	8.46485	8.86318	0.000248685	0.000569149	0.982731
7936968	NM_003474	ADAM12	ADAM metallopeptidase domain 12	6.28028	6.12427	5.83675	6.19948	4.99113	5.20166	5.31057	5.0069	0.000212906	0.00050326	0.98263
8059470	NM_005544	IRS1	insulin receptor substrate 1	6.62733	6.84387	6.72525	6.58164	5.64089	5.85542	5.60936	5.74746	1.86552e-05	8.28019e-05	0.981239
8068713	NM_002462	MX1	myxovirus (influenza virus) resistance 1, interferon-inducible protein p78 (mouse)	6.21081	6.2242	6.25917	6.28263	5.29157	5.45281	5.31112	4.99991	5.27106e-05	0.000175034	0.980352
8112687	NM_005713	COL4A3BP	collagen, type IV, alpha 3 (Goodpasture antigen) binding protein	8.97386	9.08923	9.18051	9.13791	8.02241	8.06773	8.20146	8.16952	3.80791e-06	2.80572e-05	0.980098
8056201	NM_016836	RBMS1	RNA binding motif, single stranded interacting protein 1	10.5594	10.7822	10.6816	11.0368	9.62716	9.83678	9.69922	9.97699	0.000254359	0.000578856	0.979988
7987145	NM_001103184	FMN1	formin 1	5.82957	6.24656	5.64354	5.7258	4.71781	4.87677	4.935	4.99978	0.000551612	0.00106641	0.979025
7921014	NM_005920	MEF2D	myocyte enhancer factor 2D	8.24518	8.23771	8.25088	8.33432	7.35232	7.18476	7.29341	7.32492	4.80444e-07	7.70645e-06	0.978175
7945781	NM_003311	PHLDA2	pleckstrin homology-like domain, family A, member 2	9.23255	8.8284	9.0934	8.92567	8.03958	8.3005	8.00016	7.82879	0.000315718	0.000686096	0.977745
8055220	NM_001083538	POTEE	POTE ankyrin domain family, member E	12.6184	12.4071	12.5066	12.3555	11.4207	11.3598	11.6543	11.5456	3.10852e-05	0.000118564	0.976773
8112274	NM_024930	ELOVL7	ELOVL fatty acid elongase 7	9.3873	9.36982	9.45698	9.41017	8.43198	8.29202	8.52425	8.47153	1.6834e-06	1.6893e-05	0.976121
8086961	NM_004567	PFKFB4	6-phosphofructo-2-kinase/fructose-2,6-biphosphatase 4	7.66765	7.73788	7.84901	7.52727	6.76644	6.67721	6.72985	6.70531	8.46997e-06	4.76663e-05	0.97575
8018494	NM_033452	TRIM47	tripartite motif containing 47	8.35591	8.37425	8.29258	8.32543	7.22439	7.57282	7.31247	7.33718	1.4336e-05	6.88532e-05	0.975328
8092691	NM_001706	BCL6	B-cell CLL/lymphoma 6	7.2971	7.15483	7.44569	7.41515	6.44165	6.24373	6.44677	6.28019	2.59785e-05	0.000104402	0.975109
8094574	NM_015173	TBC1D1	TBC1 (tre-2/USP6, BUB2, cdc16) domain family, member 1	9.21897	9.38752	9.25263	9.36251	8.23177	8.33586	8.34318	8.41222	2.1724e-06	1.95623e-05	0.974649
7955179	NM_032704	TUBA1C	tubulin, alpha 1c	12.265	11.9904	12.2351	11.9859	11.1488	10.9431	11.3181	11.1679	0.000104432	0.000291388	0.974635
7915160	NM_022157	RRAGC	Ras-related GTP binding C	9.82422	9.98046	9.90677	9.96732	8.9452	8.86622	9.07353	8.89856	2.80019e-06	2.29406e-05	0.973817
8048733	NM_004457	ACSL3	acyl-CoA synthetase long-chain family member 3	10.0202	9.95108	9.8793	10.0308	8.90441	8.94671	9.03536	9.10004	2.38618e-06	2.07233e-05	0.973725
7941311	NM_153253	SIPA1	signal-induced proliferation-associated 1	7.59245	7.52768	7.52322	7.52819	6.57158	6.63172	6.5938	6.48251	1.62211e-07	4.12224e-06	0.972984
8155930	NM_001490	GCNT1	glucosaminyl (N-acetyl) transferase 1, core 2	7.91812	7.94138	7.81414	8.01063	6.87955	7.02014	6.85092	7.0434	4.86493e-06	3.30064e-05	0.972566
7984103	NM_032857	LACTB	lactamase, beta	8.99215	9.13753	8.86919	9.17859	7.96977	8.23641	8.05893	8.02304	4.05578e-05	0.000144264	0.972325
8116859	NM_001165258	TMEM14C	transmembrane protein 14C	12.5825	12.8221	12.5702	12.8462	11.8453	11.9229	11.5942	11.5715	0.000155756	0.000393659	0.971782
7928471	NM_006721	ADK	adenosine kinase	11.2759	11.3124	11.2608	11.3227	10.2256	10.5293	10.2122	10.3185	1.2702e-05	6.35372e-05	0.971549
8064904	NM_017671	FERMT1	fermitin family member 1	5.88008	6.13821	5.75334	5.89724	5.20426	4.8975	5.02336	4.65793	0.000445555	0.000900177	0.971459
8071809	NM_000854	GSTT2	glutathione S-transferase theta 2	7.05767	7.29729	7.18437	7.29831	6.44057	6.18413	6.17223	6.1659	3.31897e-05	0.000123964	0.968704
8074962	NM_000854	GSTT2	glutathione S-transferase theta 2	7.05767	7.29729	7.18437	7.29831	6.44057	6.18413	6.17223	6.1659	3.31897e-05	0.000123964	0.968704
8003758	NM_000430	PAFAH1B1	platelet-activating factor acetylhydrolase 1b, regulatory subunit 1 (45kDa)	10.7386	10.9572	10.8125	10.8781	9.87143	9.83237	10.0053	9.80455	5.4615e-06	3.55341e-05	0.968166
8022022	NM_014646	LPIN2	lipin 2	7.79281	8.10871	8.05485	8.01162	6.99438	6.81036	7.07939	7.22024	0.000122134	0.000327321	0.965905
8026806	NM_024656	COLGALT1	collagen beta(1-O)galactosyltransferase 1	9.82528	9.83133	9.77528	9.76129	8.8541	8.63245	9.01662	8.82646	2.06106e-05	8.88195e-05	0.96589
7904969	NM_030796	VOPP1	vesicular, overexpressed in cancer, prosurvival protein 1	9.12668	9.01975	9.18272	9.07062	8.12711	8.00819	8.16029	8.24291	3.68573e-06	2.75326e-05	0.965319
7956867	NM_003483	HMGA2	high mobility group AT-hook 2	8.92771	9.17626	8.93833	9.26423	8.10545	8.01321	8.19102	8.13982	4.64071e-05	0.000159666	0.964256
8015681	NM_016602	CCR10	chemokine (C-C motif) receptor 10	8.64148	8.22957	8.56956	8.08775	7.60314	7.50882	7.29215	7.2677	0.000834589	0.00149196	0.964137
8163807	NM_015651	PHF19	PHD finger protein 19	8.46695	8.57339	8.44306	8.55459	7.49825	7.54645	7.55548	7.5827	1.9726e-07	4.73444e-06	0.96378
8161265	NM_001007563	IGFBPL1	insulin-like growth factor binding protein-like 1	8.36096	8.07824	8.20044	8.17062	7.20384	7.31399	7.41074	7.02746	7.6166e-05	0.000230374	0.963558
8030128	NM_014330	PPP1R15A	protein phosphatase 1, regulatory subunit 15A	10.0524	10.1362	10.1378	10.1571	9.32627	8.99167	9.10641	9.20636	1.36966e-05	6.69092e-05	0.963202
8093643	NM_176801	ADD1	adducin 1 (alpha)	8.81269	8.80632	8.89463	8.66663	7.89387	7.65792	7.87245	7.90529	1.40286e-05	6.78933e-05	0.962685
7971197	NM_172373	ELF1	E74-like factor 1 (ets domain transcription factor)	9.69893	9.83716	9.72754	9.90311	8.70365	8.59426	8.94875	9.06978	0.000192626	0.00046612	0.962571
7899273	NM_006600	NUDC	nuclear distribution C homolog (A. nidulans)	10.1208	10.1553	10.2677	10.1768	9.27684	9.17012	9.20059	9.2237	2.75611e-07	5.72555e-06	0.962335
7908041	NM_002293	LAMC1	laminin, gamma 1 (formerly LAMB2)	9.78458	9.99948	9.84859	9.93332	8.72855	8.77389	9.15692	9.06026	0.000162995	0.00040719	0.961591
8014189	NM_057178	NA	NA	8.03844	8.32403	8.14062	8.16172	7.16215	7.13319	7.21077	7.31319	1.0135e-05	5.40556e-05	0.961378
8165217	NM_017617	NOTCH1	notch 1	7.29732	7.35553	7.36523	7.33256	6.28197	6.38984	6.38178	6.45749	3.04465e-07	6.04293e-06	0.959891
7950086	NM_006185	NUMA1	nuclear mitotic apparatus protein 1	8.42771	8.55865	8.40529	8.40699	7.48176	7.33046	7.42771	7.72151	4.25641e-05	0.000149429	0.959303
8139712	NM_030796	VOPP1	vesicular, overexpressed in cancer, prosurvival protein 1	8.77539	8.72317	8.87649	8.78118	7.78292	7.79931	7.82339	7.91569	5.75663e-07	8.73565e-06	0.958733
7977456	NR_027480	POTEG	POTE ankyrin domain family, member G	5.82464	5.91837	5.73745	5.92251	4.90881	4.86894	4.84577	4.94769	1.21846e-06	1.3986e-05	0.957939
8117395	NM_003522	HIST1H2BF	histone cluster 1, H2bf	9.24183	9.76334	9.26438	9.86308	8.59074	8.21073	8.5383	8.96205	0.00525051	0.00674965	0.957704
8034202	NM_004283	RAB3D	RAB3D, member RAS oncogene family	7.97538	7.79344	7.8986	7.63948	6.7853	6.97864	6.88904	6.8239	2.75378e-05	0.000108746	0.957505
8039937	NM_001029885	GLTPD1	glycolipid transfer protein domain containing 1	6.94516	6.98975	6.55628	7.02894	5.99595	5.63568	5.81107	6.2504	0.00138683	0.00225805	0.95676
8112478	NM_004536	NAIP	NLR family, apoptosis inhibitory protein	9.09281	9.67913	9.1043	9.73509	8.45396	8.31175	8.60397	8.41575	0.00214117	0.00320558	0.956477
8017378	NM_001915	CYB561	cytochrome b-561	6.88696	6.63853	6.70206	6.64561	5.83379	5.7545	5.86819	5.59138	2.87464e-05	0.000112129	0.956322
8032265	NM_203304	MEX3D	mex-3 homolog D (C. elegans)	9.15281	9.19927	9.1977	9.14488	8.34856	8.33636	8.02002	8.16463	1.98389e-05	8.66025e-05	0.956274
8003410	NM_000512	GALNS	galactosamine (N-acetyl)-6-sulfate sulfatase	9.05356	9.05583	8.93681	9.1199	8.17285	8.03278	8.10885	8.02824	1.55794e-06	1.62837e-05	0.955847
7916045	NM_001981	EPS15	epidermal growth factor receptor pathway substrate 15	10.8621	10.9127	10.8866	10.9973	9.87532	9.94193	10.0151	10.0046	5.98466e-07	8.99762e-06	0.955419
7974851	NM_001530	HIF1A	hypoxia inducible factor 1, alpha subunit (basic helix-loop-helix transcription factor)	11.2479	11.5975	11.3678	11.6755	10.439	10.3762	10.6153	10.6367	0.000193804	0.000468096	0.95538
8087236	NM_001009996	DALRD3	DALR anticodon binding domain containing 3	8.94209	9.01095	8.96581	8.92814	8.0467	8.00621	7.96325	8.01105	2.11603e-08	1.24214e-06	0.954946
8003171	NM_021149	COTL1	coactosin-like 1 (Dictyostelium)	9.38739	9.33077	9.35916	9.21293	8.50248	8.48228	8.39732	8.0917	8.68291e-05	0.000254489	0.954113
8139281	NM_013284	POLM	polymerase (DNA directed), mu	8.20467	8.38347	8.18329	8.30591	7.32487	7.57028	7.20668	7.16273	8.76044e-05	0.00025624	0.953197
8016168	NM_133373	PLCD3	phospholipase C, delta 3	8.70566	8.80793	8.65783	8.72767	7.67451	7.77013	7.78249	7.86152	1.27373e-06	1.42681e-05	0.952613
8131253	NM_001037165	FOXK1	forkhead box K1	8.88549	8.93039	8.86386	9.02991	8.05963	7.8557	8.07728	7.90709	7.13372e-06	4.2725e-05	0.952486
7907749	NM_173533	TDRD5	tudor domain containing 5	5.57625	6.10607	5.78245	5.67006	5.01529	4.90465	4.57741	4.8288	0.000671731	0.00125153	0.952172
8140955	NM_001259	CDK6	cyclin-dependent kinase 6	9.23683	9.30154	9.25816	9.34264	8.24699	8.17925	8.37358	8.5307	2.26066e-05	9.46898e-05	0.952164
8125204	NM_002904	NELFE	negative elongation factor complex member E	9.83453	9.55345	9.4844	9.42078	8.68874	8.64637	8.49583	8.65623	8.04236e-05	0.000240224	0.951496
8178686	NM_002904	NELFE	negative elongation factor complex member E	9.83453	9.55345	9.4844	9.42078	8.68874	8.64637	8.49583	8.65623	8.04236e-05	0.000240224	0.951496
8179913	NM_002904	NELFE	negative elongation factor complex member E	9.83453	9.55345	9.4844	9.42078	8.68874	8.64637	8.49583	8.65623	8.04236e-05	0.000240224	0.951496
8007312	NM_016437	TUBG2	tubulin, gamma 2	8.45972	8.66544	8.41773	8.54266	7.68419	7.31541	7.57777	7.70249	9.90134e-05	0.000280067	0.951421
8118535	NM_006913	RNF5	ring finger protein 5, E3 ubiquitin protein ligase	8.62652	8.76781	8.74491	8.75398	7.7564	7.77858	7.62136	7.93207	1.11613e-05	5.76953e-05	0.951201
8179472	NM_006913	RNF5	ring finger protein 5, E3 ubiquitin protein ligase	8.62652	8.76781	8.74491	8.75398	7.7564	7.77858	7.62136	7.93207	1.11613e-05	5.76953e-05	0.951201
8136315	NM_144648	LRGUK	leucine-rich repeats and guanylate kinase domain containing	6.29966	6.87544	6.59118	7.10866	5.62347	5.4015	5.92925	6.11715	0.00696358	0.0085354	0.950891
8072946	NM_016091	EIF3L	eukaryotic translation initiation factor 3, subunit L	11.4462	11.4256	11.4444	11.4641	12.4588	12.2948	12.4216	12.4062	2.00222e-07	4.7602e-06	-0.950228
7951679	NR_028383	TIMM8B	translocase of inner mitochondrial membrane 8 homolog B (yeast)	9.03445	9.14133	9.03982	8.89844	9.98963	10.0255	9.90001	10.0014	2.93019e-06	2.36113e-05	-0.950627
7976336	NM_175748	UBR7	ubiquitin protein ligase E3 component n-recognin 7 (putative)	7.12004	7.33723	7.1668	7.4306	8.19364	8.05639	8.20346	8.40873	8.91632e-05	0.000259104	-0.951886
7975390	NM_001034852	SMOC1	SPARC related modular calcium binding 1	6.403	6.02178	6.39362	6.33534	7.2035	7.24961	7.38789	7.1208	0.000106884	0.000295936	-0.952014
7957551	NM_003877	SOCS2	suppressor of cytokine signaling 2	7.66001	7.44829	7.57424	7.52809	8.68559	8.50441	8.33019	8.49895	3.02213e-05	0.000116469	-0.952126
8036318	NM_001145345	ZNF566	zinc finger protein 566	6.90732	7.19	6.84281	7.48083	8.11198	7.98166	7.9798	8.15877	0.000795684	0.00143349	-0.952811
7983527	NM_153618	SEMA6D	sema domain, transmembrane domain (TM), and cytoplasmic domain, (semaphorin) 6D	5.57261	5.44224	5.56855	5.52352	6.16594	6.03976	6.8007	6.91202	0.00516754	0.00666575	-0.952877
8035803	NM_021269	ZNF708	zinc finger protein 708	6.77897	7.38516	6.76736	7.35355	7.67849	8.07626	8.01384	8.3285	0.00472347	0.00617776	-0.953013
7958666	NM_013300	FAM216A	family with sequence similarity 216, member A	9.6621	10.0195	9.69385	10.091	10.9388	11.1726	10.5261	10.6411	0.00200498	0.00303641	-0.953033
7917996	NM_144620	LRRC39	leucine rich repeat containing 39	5.82423	6.06357	5.84744	6.20088	6.83193	6.78845	6.92166	7.20723	0.000333692	0.000716268	-0.953288
7961279	NM_023922	TAS2R14	taste receptor, type 2, member 14	6.28852	6.83248	6.18076	6.8642	7.44956	7.47791	7.55536	7.49642	0.00183811	0.00282965	-0.953318
7922889	NM_006469	IVNS1ABP	influenza virus NS1A binding protein	8.61728	8.67702	8.65875	8.72484	9.64551	9.52969	9.66743	9.64976	2.88665e-07	5.87503e-06	-0.953622
7946288	NM_013249	ZNF214	zinc finger protein 214	4.61112	4.82443	4.9716	4.76667	5.77724	5.68782	5.73106	5.79227	1.84947e-05	8.23433e-05	-0.953642
8047038	NM_000534	PMS1	PMS1 postmeiotic segregation increased 1 (S. cerevisiae)	8.56846	8.84977	8.62121	8.82876	9.67115	9.73106	9.58387	9.69695	1.83787e-05	8.19958e-05	-0.953709
8071559	NM_022044	SDF2L1	stromal cell-derived factor 2-like 1	7.43371	7.09998	7.56567	7.2086	8.34386	8.43406	8.11074	8.2354	0.000283177	0.000629416	-0.954023
8047518	NM_015934	NOP58	NOP58 ribonucleoprotein	10.6239	10.693	10.6256	10.7392	11.5147	11.5482	11.7062	11.7287	4.38016e-06	3.09288e-05	-0.954042
7916969	NM_005455	ZRANB2	zinc finger, RAN-binding domain containing 2	10.7559	10.6914	10.896	10.7773	11.6458	11.7213	11.7577	11.8121	2.38724e-06	2.07233e-05	-0.954053
7922462	NM_022100	MRPS14	mitochondrial ribosomal protein S14	9.11708	9.22221	9.14799	9.33746	10.2347	10.2758	9.9565	10.1749	3.26223e-05	0.000122641	-0.954281
8072274	NM_001003684	UQCR10	ubiquinol-cytochrome c reductase, complex III subunit X	9.79904	9.79782	9.83768	9.70923	10.8536	10.7735	10.6466	10.6873	2.00395e-06	1.8712e-05	-0.954304
8051589	NM_022374	ATL2	atlastin GTPase 2	7.9408	8.08736	8.12142	8.01356	8.87812	9.09892	9.06757	8.93666	6.95115e-06	4.19711e-05	-0.954534
8155673	NM_003558	PIP5K1B	phosphatidylinositol-4-phosphate 5-kinase, type I, beta	4.90527	4.82644	4.77943	4.84632	5.79686	5.94012	5.57715	5.86236	2.46325e-05	0.000100425	-0.954758
8168391	NR_026594	FAM226B	family with sequence similarity 226, member B (non-protein coding)	5.71666	5.72335	5.61922	5.41736	6.52183	6.64015	6.55343	6.58084	1.51293e-05	7.14852e-05	-0.954915
8152606	NM_021021	SNTB1	syntrophin, beta 1 (dystrophin-associated protein A1, 59kDa, basic component 1)	7.75285	7.34546	7.44047	7.34477	8.33271	8.57047	8.47562	8.32811	0.000150375	0.00038252	-0.95584
8155602	NM_001012421	ANKRD20A2	ankyrin repeat domain 20 family, member A2	6.40116	6.88169	6.6707	7.0031	7.64353	7.54514	7.69746	7.89431	0.000727484	0.00133266	-0.955947
7983828	NM_198524	TEX9	testis expressed 9	6.7782	7.46131	7.06205	7.48546	8.04375	8.3849	7.95018	8.23217	0.00275535	0.00394682	-0.955996
7975760	NM_014239	EIF2B2	eukaryotic translation initiation factor 2B, subunit 2 beta, 39kDa	8.87595	9.06777	8.95028	8.89446	9.95048	9.90662	9.9098	9.8472	1.05745e-06	1.27727e-05	-0.956412
8170971	NM_001363	DKC1	dyskeratosis congenita 1, dyskerin	9.8981	10.0577	10.0471	10.0751	10.9504	10.8811	11.0005	11.0729	3.01333e-06	2.40187e-05	-0.956696
7899361	NM_177424	STX12	syntaxin 12	8.88131	8.95542	8.84207	8.99295	9.82045	9.94656	9.83186	9.90091	7.44925e-07	1.01414e-05	-0.957009
8032009	NM_017550	MIER2	mesoderm induction early response 1, family member 2	5.67976	5.32195	5.51922	5.36809	6.35539	6.48359	6.48516	6.39391	3.42084e-05	0.00012655	-0.957255
8129099	NM_003309	TSPYL1	TSPY-like 1	9.58011	9.6686	9.66801	9.70431	10.5917	10.4456	10.6382	10.7755	1.21047e-05	6.12348e-05	-0.957477
8138708	NM_005522	HOXA1	homeobox A1	6.97448	6.91009	6.64745	7.06654	7.60827	7.51623	8.0641	8.2399	0.00280639	0.00400399	-0.957486
8119648	NM_057161	KLHDC3	kelch domain containing 3	9.15762	8.99753	9.22132	8.86739	10.0213	9.87861	10.1622	10.0129	6.85773e-05	0.000212733	-0.9578
8106827	NM_032119	GPR98	G protein-coupled receptor 98	6.42333	6.51625	6.46159	6.52834	7.30368	7.26322	7.60098	7.59397	5.27962e-05	0.000175273	-0.958086
8096771	NM_021227	OSTC	oligosaccharyltransferase complex subunit	11.5803	11.4943	11.5164	11.4187	12.4882	12.5679	12.3956	12.391	1.99971e-06	1.87036e-05	-0.958246
8154563	NM_001010887	ACER2	alkaline ceramidase 2	5.98108	5.77562	5.60849	5.6206	6.44031	6.57937	7.01416	6.78582	0.000752534	0.00136952	-0.95847
8042601	NM_014497	ZNF638	zinc finger protein 638	8.43933	8.78244	8.44317	8.84538	9.47961	9.59898	9.59372	9.67233	0.000165219	0.000411794	-0.958578
7954419	NM_018638	ETNK1	ethanolamine kinase 1	7.6351	7.92725	7.66304	7.87646	8.62266	8.75523	8.79757	8.7613	2.58047e-05	0.000103961	-0.958725
8068833	NM_002606	PDE9A	phosphodiesterase 9A	7.62238	7.79536	7.6854	7.57886	8.58513	8.58151	8.59997	8.75303	4.84491e-06	3.29447e-05	-0.959409
8091637	NM_004733	SLC33A1	solute carrier family 33 (acetyl-CoA transporter), member 1	8.97565	8.93453	8.93715	8.81152	9.7415	9.77974	9.90396	10.0749	2.53428e-05	0.000102546	-0.960321
7961483	NM_175054	HIST4H4	histone cluster 4, H4	5.15351	4.87437	4.96543	5.02503	6.18005	6.18972	5.71004	5.78137	0.000478973	0.000953864	-0.960713
8143341	NM_030647	JHDM1D	jumonji C domain containing histone demethylase 1 homolog D (S. cerevisiae)	7.52276	7.70606	7.52747	7.58569	8.52076	8.32422	8.60529	8.73558	5.83666e-05	0.000189116	-0.960969
8100495	NM_002703	PPAT	phosphoribosyl pyrophosphate amidotransferase	9.65237	9.61084	9.75305	9.58667	10.5722	10.5546	10.6052	10.7185	1.60665e-06	1.65308e-05	-0.961871
7985507	NR_026799	SH3GL3	SH3-domain GRB2-like 3	6.5049	6.5438	6.50571	6.56701	7.4545	7.60847	7.40719	7.49914	7.43077e-07	1.01348e-05	-0.96197
8158298	NM_001003722	GLE1	GLE1 RNA export mediator homolog (yeast)	8.55402	8.63869	8.60178	8.59802	9.61433	9.51885	9.49417	9.6141	1.79626e-07	4.40919e-06	-0.962236
8068062	NM_006447	USP16	ubiquitin specific peptidase 16	9.79531	9.98005	9.83679	10.0499	10.9029	10.984	10.7534	10.8707	1.55048e-05	7.26503e-05	-0.962238
7965941	NM_031302	GLT8D2	glycosyltransferase 8 domain containing 2	7.24895	7.69964	7.27159	7.77007	8.50431	8.63249	8.31106	8.3923	0.000791362	0.00142768	-0.962478
8038904	NM_032679	ZNF577	zinc finger protein 577	6.52135	6.46462	6.46039	6.6888	7.45313	7.49652	7.49937	7.53804	2.54258e-06	2.1524e-05	-0.962974
8042066	NM_080667	CCDC104	coiled-coil domain containing 104	7.14039	7.52861	7.58228	7.70204	8.50611	8.58385	8.32404	8.39171	0.000376325	0.000788709	-0.963095
8123038	NM_207118	GTF2H5	general transcription factor IIH, polypeptide 5	8.21028	8.36102	8.23063	8.18846	9.34766	9.29208	8.91336	9.28978	0.000106709	0.000295704	-0.96312
8160016	NM_012416	RANBP6	RAN binding protein 6	8.6398	8.69103	8.7811	8.84936	9.56044	9.77087	9.66338	9.82006	1.29789e-05	6.43757e-05	-0.963367
8043278	NM_016622	MRPL35	mitochondrial ribosomal protein L35	8.48881	8.61123	8.4865	8.63455	9.61338	9.66505	9.39193	9.40463	2.08234e-05	8.94797e-05	-0.963472
8151890	NM_033285	TP53INP1	tumor protein p53 inducible nuclear protein 1	6.3722	6.19761	6.09083	6.18715	7.00508	6.99359	7.39332	7.31024	0.000187053	0.000455193	-0.963611
7926728	NM_017433	MYO3A	myosin IIIA	5.7818	6.2336	5.83842	6.35822	6.92512	6.96635	7.10443	7.0707	0.000651636	0.00122081	-0.963639
8075406	NM_014303	PES1	pescadillo ribosomal biogenesis factor 1	8.01454	8.11996	8.15678	8.06123	9.21535	8.92464	9.01891	9.04891	7.86201e-06	4.53101e-05	-0.963825
8112980	NM_005711	EDIL3	EGF-like repeats and discoidin I-like domains 3	6.94016	7.69316	7.22672	7.85248	8.22722	8.44762	8.42481	8.47178	0.00437866	0.00579909	-0.964726
7938816	NM_019028	ZDHHC13	zinc finger, DHHC-type containing 13	9.00283	9.2825	9.1843	9.3642	10.1511	10.3407	10.0738	10.1274	6.00803e-05	0.000193267	-0.964794
8096675	NM_001127208	TET2	tet methylcytosine dioxygenase 2	6.99434	7.34988	7.06856	7.33011	8.11239	8.05715	8.21514	8.21904	6.62447e-05	0.000207731	-0.965203
8121349	NM_145315	LACE1	lactation elevated 1	6.44044	6.97824	6.8322	7.0473	7.74862	7.61205	7.78104	8.01888	0.000931333	0.00162918	-0.965604
7985555	NM_024580	EFTUD1	elongation factor Tu GTP binding domain containing 1	6.59359	6.62694	7.06903	6.94863	7.86548	7.4455	7.46524	8.32478	0.00671158	0.00827726	-0.965703
8169920	NM_016024	RBMX2	RNA binding motif protein, X-linked 2	8.33977	8.41913	8.49419	8.30275	9.41609	9.40741	9.27359	9.32406	2.11172e-06	1.93148e-05	-0.966325
7898602	NM_015207	OTUD3	OTU domain containing 3	6.64928	6.79409	7.04134	6.67864	7.58975	7.50814	7.96495	7.96677	0.00067788	0.00126032	-0.966565
7980316	NM_003239	TGFB3	transforming growth factor, beta 3	5.66202	5.22976	5.38322	5.47091	6.4646	6.50689	6.19165	6.44937	0.000155376	0.000392928	-0.966651
7968972	NM_005694	COX17	cytochrome c oxidase assembly homolog 17 (yeast)	8.22622	8.51311	8.40718	8.48231	9.30224	9.49484	8.92637	9.77326	0.00219262	0.00327089	-0.966971
7980828	NM_001080414	CCDC88C	coiled-coil domain containing 88C	5.59585	5.84227	5.49909	5.95786	7.36273	6.34426	6.55821	6.5012	0.0085213	0.0100929	-0.967837
8000932	NM_001014979	C16orf93	chromosome 16 open reading frame 93	6.47276	6.73333	6.69688	6.70743	7.46233	7.5643	7.64022	7.81525	5.48769e-05	0.000180242	-0.967924
7965264	NM_025114	CEP290	centrosomal protein 290kDa	7.2441	7.48171	7.31592	7.65102	8.28736	8.45165	8.38604	8.44034	6.29067e-05	0.000199616	-0.968161
7961339	NM_002336	LRP6	low density lipoprotein receptor-related protein 6	8.33355	8.6349	8.35811	8.60026	9.41043	9.25811	9.57676	9.55518	0.00010814	0.000298711	-0.968415
8117071	NM_016255	FAM8A1	family with sequence similarity 8, member A1	8.63811	8.81396	8.77585	8.67419	9.55556	9.7364	9.652	9.83216	1.05754e-05	5.5694e-05	-0.968503
8127031	NM_002388	MCM3	minichromosome maintenance complex component 3	9.90688	9.87643	9.79961	9.8904	10.8468	10.7475	10.914	10.8428	4.12851e-07	7.00363e-06	-0.969461
8161362	NR_003670	KGFLP2	keratinocyte growth factor-like protein 2	5.81968	5.69605	5.95186	5.92954	6.72013	6.9595	6.76502	6.83538	1.71081e-05	7.78274e-05	-0.970723
8130739	NM_021135	RPS6KA2	ribosomal protein S6 kinase, 90kDa, polypeptide 2	6.4528	6.26741	6.32849	6.05702	7.22432	7.40155	7.0636	7.30373	0.000112539	0.00030765	-0.971873
8135410	NM_181581	DUS4L	dihydrouridine synthase 4-like (S. cerevisiae)	6.85561	6.65608	6.63841	6.67473	7.77204	7.85346	7.48143	7.60835	5.79488e-05	0.000187997	-0.972612
7925561	NM_198076	COX20	COX20 Cox2 chaperone homolog (S. cerevisiae)	7.97925	8.33724	8.03696	8.23831	8.83314	8.97174	9.33846	9.3398	0.000738222	0.00134776	-0.972844
7945014	NM_001274	CHEK1	checkpoint kinase 1	9.43458	9.69857	9.44672	9.73162	10.5917	10.4971	10.5083	10.6065	2.5535e-05	0.000103099	-0.973033
7972069	NM_015057	MYCBP2	MYC binding protein 2, E3 ubiquitin protein ligase	8.48463	8.75252	8.63595	8.80248	9.53298	9.48314	9.84611	9.70565	0.000110498	0.000303736	-0.973074
8083183	NM_001080415	U2SURP	U2 snRNP-associated SURP domain containing	10.4988	10.5705	10.5165	10.6397	11.4452	11.4885	11.5451	11.6396	1.60939e-06	1.65308e-05	-0.973213
7962312	NM_005164	ABCD2	ATP-binding cassette, sub-family D (ALD), member 2	5.00144	4.9823	4.91281	4.90073	6.02546	5.91817	5.91842	5.82834	8.71517e-07	1.11742e-05	-0.973277
7972190	NM_022118	RBM26	RNA binding motif protein 26	9.38618	9.69675	9.46021	9.805	10.4628	10.3636	10.6063	10.8091	0.000404544	0.000833422	-0.973425
8113286	NM_018343	RIOK2	RIO kinase 2	8.28618	8.54386	8.27525	8.50315	9.32882	9.75497	9.25296	9.16594	0.000604848	0.00114893	-0.973563
7912292	NM_032368	LZIC	leucine zipper and CTNNBIP1 domain containing	7.77791	7.81922	7.8173	7.89705	8.74184	8.43931	8.9879	9.03679	0.000424391	0.000865241	-0.973589
8117696	NM_004375	COX11	cytochrome c oxidase assembly homolog 11 (yeast)	7.28038	7.36846	7.16602	7.44572	8.0877	8.39384	8.35187	8.32258	3.99337e-05	0.000142422	-0.973855
7930714	NM_207303	ATRNL1	attractin-like 1	6.8145	6.82416	6.74051	6.8727	7.81785	7.90597	7.74515	7.68149	2.18277e-06	1.95952e-05	-0.974647
7950420	NM_001144869	LIPT2	lipoyl(octanoyl) transferase 2 (putative)	7.48263	7.30692	7.09365	7.11329	8.14133	8.54178	8.11069	8.10133	0.000441214	0.000892938	-0.974663
7936871	NM_000274	OAT	ornithine aminotransferase	9.95342	9.95912	10.1453	10.0817	11.0537	11.2135	10.9044	10.8669	4.17748e-05	0.000147406	-0.974767
8041212	NM_182551	LCLAT1	lysocardiolipin acyltransferase 1	9.73553	10.0067	9.69235	9.94274	10.677	10.8154	10.9372	10.8472	4.69015e-05	0.000160703	-0.974854
7905395	NM_002796	PSMB4	proteasome (prosome, macropain) subunit, beta type, 4	10.7397	10.7245	10.7891	10.6787	11.7171	11.706	11.6544	11.7546	6.55193e-08	2.37862e-06	-0.975029
7898894	NM_020362	PITHD1	PITH (C-terminal proteasome-interacting domain of thioredoxin-like) domain containing 1	7.36431	7.76533	7.66432	7.87796	8.67125	8.60704	8.64478	8.65238	0.000120392	0.000323944	-0.975881
8020930	NM_018255	ELP2	elongator acetyltransferase complex subunit 2	8.26701	8.37258	8.39288	8.36439	9.34253	9.12484	9.41253	9.42057	1.22096e-05	6.16451e-05	-0.975901
7933750	NM_194298	SLC16A9	solute carrier family 16, member 9 (monocarboxylic acid transporter 9)	5.61844	5.85095	5.49671	5.6063	6.65761	6.57943	6.55322	6.68677	1.96942e-05	8.6174e-05	-0.97616
8052331	NM_033109	PNPT1	polyribonucleotide nucleotidyltransferase 1	8.80164	8.99298	8.91348	9.08395	9.88134	9.90134	10.0608	9.85339	1.35892e-05	6.65621e-05	-0.976201
8169028	NM_206917	NGFRAP1	nerve growth factor receptor (TNFRSF16) associated protein 1	8.74584	8.76498	8.88961	8.74641	9.75078	9.84046	9.64779	9.81449	2.07077e-06	1.9102e-05	-0.97667
8132929	NM_001483	GBAS	glioblastoma amplified sequence	9.9366	10.1174	9.89514	10.1764	11.0807	11.0578	10.9342	10.9604	1.4887e-05	7.07012e-05	-0.976869
7957452	NM_006982	ALX1	ALX homeobox 1	7.68703	8.145	7.77014	8.23905	8.86263	9.19989	8.69156	8.99562	0.00133868	0.00219427	-0.977119
7904000	NM_007204	DDX20	DEAD (Asp-Glu-Ala-Asp) box polypeptide 20	9.25633	9.53673	9.37742	9.65854	10.4229	10.4377	10.4994	10.3781	4.0464e-05	0.000144014	-0.977294
8146579	NM_017780	CHD7	chromodomain helicase DNA binding protein 7	7.78785	7.88351	7.80333	7.9609	8.81615	8.60859	9.00005	8.92154	4.55826e-05	0.0001577	-0.977686
8022338	NM_145290	GPR125	G protein-coupled receptor 125	6.58203	7.06404	6.86645	7.05522	7.75343	7.28986	8.17135	8.26445	0.0078689	0.00946148	-0.977841
8041553	NM_024775	GEMIN6	gem (nuclear organelle) associated protein 6	6.32954	6.32807	6.37048	6.15966	7.30617	7.44604	7.05974	7.2885	4.24964e-05	0.000149262	-0.978174
7920317	NM_004515	ILF2	interleukin enhancer binding factor 2	12.5409	12.4576	12.5248	12.5847	13.5611	13.5523	13.4582	13.4505	2.92056e-07	5.90044e-06	-0.978503
7911559	NM_017971	MRPL20	mitochondrial ribosomal protein L20	9.76521	9.74563	9.77775	9.81536	10.8753	10.8159	10.6708	10.6565	2.23832e-06	1.98426e-05	-0.978608
8039939	NM_017971	MRPL20	mitochondrial ribosomal protein L20	9.76521	9.74563	9.77775	9.81536	10.8753	10.8159	10.6708	10.6565	2.23832e-06	1.98426e-05	-0.978608
7914354	NM_012392	PEF1	penta-EF-hand domain containing 1	9.53358	9.58862	9.44009	9.48727	10.566	10.336	10.5716	10.4914	4.67972e-06	3.22047e-05	-0.97883
8180100	NM_033554	HLA-DPA1	major histocompatibility complex, class II, DP alpha 1	8.13048	8.52198	8.33149	8.49715	9.41873	9.46615	9.22689	9.28575	9.24225e-05	0.000266129	-0.979102
8076260	NM_006358	SLC25A17	solute carrier family 25 (mitochondrial carrier; peroxisomal membrane protein, 34kDa), member 17	8.4691	8.44962	8.45122	8.46388	9.36461	9.47995	9.49284	9.41413	5.79714e-08	2.20983e-06	-0.979431
8083605	NM_016625	RSRC1	arginine/serine-rich coiled-coil 1	8.56178	8.94497	8.82065	8.93478	9.66745	9.89943	9.69669	9.91665	0.000115788	0.000314937	-0.979511
7962384	NM_025003	ADAMTS20	ADAM metallopeptidase with thrombospondin type 1 motif, 20	4.83024	4.61112	4.79417	4.66445	5.54771	5.3547	6.08447	5.83118	0.00113063	0.00190926	-0.979521
8049582	NM_016510	SCLY	selenocysteine lyase	7.9468	8.17594	7.97897	8.09119	9.06149	8.89082	9.18421	8.97526	2.05838e-05	8.88073e-05	-0.979722
7910550	NM_005999	TSNAX	translin-associated factor X	8.88749	9.04838	8.94556	8.96717	9.75051	9.98566	9.95726	10.0754	1.37163e-05	6.69092e-05	-0.980065
7908409	NM_002923	RGS2	regulator of G-protein signaling 2, 24kDa	7.22045	6.99026	7.30382	7.21298	8.08401	8.47734	7.93232	8.15577	0.000319669	0.000692592	-0.980484
7907790	NM_014810	CEP350	centrosomal protein 350kDa	8.7084	9.05533	8.80518	9.07773	9.75633	9.86891	10.0375	9.90584	0.000102695	0.000287842	-0.980486
7989670	NM_194272	RBPMS2	RNA binding protein with multiple splicing 2	7.42452	7.41238	7.23225	7.21724	8.34366	8.28331	8.30931	8.27657	2.74363e-06	2.25914e-05	-0.981611
7980390	NM_001113475	NOXRED1	NADP-dependent oxidoreductase domain containing 1	5.3802	5.27355	4.90861	4.96072	6.35775	5.92943	6.0552	6.10996	0.000535848	0.00104211	-0.982317
7962935	NM_212461	PRKAG1	protein kinase, AMP-activated, gamma 1 non-catalytic subunit	9.48874	9.61993	9.50653	9.58632	10.5635	10.6692	10.3902	10.5104	5.75684e-06	3.66463e-05	-0.982965
8140915	NM_000466	PEX1	peroxisomal biogenesis factor 1	7.99799	8.26825	8.13266	8.27165	9.03547	9.27038	9.10706	9.1903	2.13965e-05	9.0981e-05	-0.983168
8175217	NM_001448	GPC4	glypican 4	5.70711	6.19629	5.77948	6.13015	6.92446	6.96485	6.7555	7.10122	0.000449301	0.000905407	-0.983251
8074969	NM_001355	DDT	D-dopachrome tautomerase	10.6587	11.2063	10.5969	11.1652	11.9071	11.9088	11.9783	11.7666	0.00108942	0.0018515	-0.983401
7981217	NM_018036	ATG2B	autophagy related 2B	7.74741	8.11211	7.63962	8.26057	8.88575	8.82794	9.00635	8.97744	0.000660913	0.00123515	-0.984439
8056060	NM_013450	BAZ2B	bromodomain adjacent to zinc finger domain, 2B	6.43054	6.63484	6.57946	6.75545	7.55878	7.45331	7.58753	7.73904	3.36958e-05	0.000125113	-0.984593
7923426	NM_014176	UBE2T	ubiquitin-conjugating enzyme E2T (putative)	10.4746	10.4801	10.4519	10.4889	11.4579	11.6223	11.3516	11.4049	2.96688e-06	2.37553e-05	-0.985288
7956842	NM_014319	LEMD3	LEM domain containing 3	7.68535	7.94588	7.89964	7.71736	8.66616	8.74377	8.85034	8.92938	2.84449e-05	0.000111356	-0.985356
8046160	NM_006063	KLHL41	kelch-like family member 41	4.47932	4.44606	4.47957	4.29902	5.45236	5.59848	5.33488	5.26006	2.55975e-05	0.000103287	-0.985452
8082750	NM_024818	UBA5	ubiquitin-like modifier activating enzyme 5	8.37324	8.45146	8.43222	8.58235	9.39728	9.28514	9.56068	9.53874	1.52488e-05	7.18926e-05	-0.985644
8099246	NM_025196	GRPEL1	GrpE-like 1, mitochondrial (E. coli)	9.38296	9.36189	9.46126	9.16597	10.4414	10.268	10.288	10.3174	1.09528e-05	5.70097e-05	-0.985673
8027642	NM_032346	PDCD2L	programmed cell death 2-like	7.2132	7.03453	7.33355	7.03681	8.06941	7.91238	8.11108	8.46908	0.000384085	0.000800957	-0.985967
8089795	NM_005694	COX17	cytochrome c oxidase assembly homolog 17 (yeast)	8.76291	8.97624	8.92219	8.96666	9.8274	10.0072	9.46193	10.2777	0.00145898	0.00234927	-0.986549
8006477	NM_052857	ZNF830	zinc finger protein 830	7.13786	7.43009	7.2247	7.61509	8.21981	8.34885	8.05499	8.73229	0.0015202	0.00243157	-0.98705
8007071	NM_001254	CDC6	cell division cycle 6	9.58446	9.63726	9.65102	9.61076	10.6973	10.63	10.6347	10.4698	1.19333e-06	1.38462e-05	-0.987097
8142100	NM_020725	ATXN7L1	ataxin 7-like 1	6.53331	6.84812	6.44439	6.93476	7.58718	7.33132	7.61718	8.17372	0.00361122	0.00494698	-0.987207
7990379	NM_001142443	EDC3	enhancer of mRNA decapping 3 homolog (S. cerevisiae)	7.82483	8.18708	8.07326	8.29765	9.09054	8.98733	9.12383	9.13045	8.91038e-05	0.000258989	-0.987333
8156575	NM_015251	ATMIN	ATM interactor	7.42629	7.73053	7.94005	7.62195	8.65548	8.51959	8.67599	8.81873	0.000203297	0.000484435	-0.987746
8175263	NM_021796	PLAC1	placenta-specific 1	5.57939	5.21851	5.31918	5.07323	6.19251	6.27079	6.3177	6.36157	0.00012142	0.000326014	-0.988065
8006214	NM_018404	ADAP2	ArfGAP with dual PH domains 2	6.27686	6.28154	6.26854	6.13648	7.13514	7.10532	7.23017	7.44521	2.34135e-05	9.67639e-05	-0.988105
8055672	NM_015702	MMADHC	methylmalonic aciduria (cobalamin deficiency) cblD type, with homocystinuria	9.76021	9.68702	9.79804	9.72391	10.6695	10.7874	10.7183	10.7478	1.18285e-07	3.46582e-06	-0.988461
8162466	NM_198841	FAM120AOS	family with sequence similarity 120A opposite strand	8.61731	8.64777	8.66941	8.78901	9.57291	9.88284	9.69796	9.52381	3.05881e-05	0.000117394	-0.988503
8013094	NM_003653	COPS3	COP9 constitutive photomorphogenic homolog subunit 3 (Arabidopsis)	11.1064	11.0791	11.073	11.1125	12.0915	12.1605	11.9707	12.1042	3.38723e-07	6.30934e-06	-0.988996
8132045	NM_032639	PLEKHA8	pleckstrin homology domain containing, family A (phosphoinositide binding specific) member 8	7.26715	7.43813	7.13526	7.41718	8.35381	8.07572	8.33545	8.44882	8.93715e-05	0.000259535	-0.989021
8156982	NM_001042551	SMC2	structural maintenance of chromosomes 2	9.15654	9.20481	9.16263	9.2466	10.1198	10.1952	10.2125	10.1997	4.82313e-08	1.98446e-06	-0.989168
8099612	NM_145290	GPR125	G protein-coupled receptor 125	6.61683	6.6558	6.54702	6.47147	7.54326	7.42636	7.66521	7.61588	5.46961e-06	3.55457e-05	-0.9899
8057034	NM_003690	PRKRA	protein kinase, interferon-inducible double stranded RNA dependent activator	9.17299	9.14212	9.09709	8.98271	10.085	9.99545	10.1646	10.111	1.81701e-06	1.77063e-05	-0.990291
8110463	NM_058230	ZNF354B	zinc finger protein 354B	7.28299	7.72362	7.32817	7.96945	8.30405	8.56693	8.53546	8.86117	0.00257436	0.00372795	-0.990838
8108134	NM_014829	DDX46	DEAD (Asp-Glu-Ala-Asp) box polypeptide 46	9.20373	9.35123	9.22679	9.36698	10.252	10.1421	10.3683	10.3531	6.03399e-06	3.80369e-05	-0.991687
8139244	NM_018224	COA1	cytochrome c oxidase assembly factor 1 homolog (S. cerevisiae)	10.7922	11.0221	10.8372	10.902	11.8752	12.0263	11.8115	11.8074	8.73731e-06	4.86846e-05	-0.991726
8131292	NM_021163	RBAK	RB-associated KRAB zinc finger	7.36109	7.80135	7.57839	7.82822	8.38471	8.71426	8.6437	8.7944	0.000406681	0.000836902	-0.992006
8152617	NM_005328	HAS2	hyaluronan synthase 2	5.75491	5.37937	5.98955	5.31853	6.51916	6.74943	6.57176	6.57174	0.00100601	0.0017359	-0.992428
8055465	NM_001008540	CXCR4	chemokine (C-X-C motif) receptor 4	7.66643	7.87346	7.86727	7.66801	8.8478	8.70752	8.6478	8.84385	1.34901e-05	6.62214e-05	-0.992946
7974054	NM_003616	GEMIN2	gem (nuclear organelle) associated protein 2	6.63363	6.97963	7.09753	7.14573	7.89668	8.02285	7.7248	8.18538	0.000596111	0.00113633	-0.993297
8176174	NM_002436	MPP1	membrane protein, palmitoylated 1, 55kDa	8.76503	8.87556	8.94155	8.92532	9.81546	9.94285	9.7695	9.95319	3.34317e-06	2.57759e-05	-0.993385
7935903	NM_006993	NPM3	nucleophosmin/nucleoplasmin 3	8.70867	8.72551	8.59304	8.68326	9.84284	9.70046	9.53715	9.60525	9.37049e-06	5.12001e-05	-0.993805
8142431	NR_024412	LOC401397	uncharacterized LOC401397	7.94907	8.11378	8.19624	8.27178	8.98781	9.24941	8.86689	9.40316	0.000394293	0.000817979	-0.994101
7915682	NM_020883	ZSWIM5	zinc finger, SWIM-type containing 5	6.69374	6.48126	6.75469	6.53752	7.57139	7.56569	7.78768	7.5192	2.87081e-05	0.00011207	-0.994185
7972055	NM_138444	KCTD12	potassium channel tetramerisation domain containing 12	7.75149	7.37014	7.54166	7.35218	8.42278	8.41223	8.5824	8.57657	7.49003e-05	0.000227768	-0.99463
8160033	NM_003094	SNRPE	small nuclear ribonucleoprotein polypeptide E	9.88145	9.97194	9.96859	10.0872	11.0257	11.0582	10.8037	11.0008	8.37704e-06	4.74109e-05	-0.994821
7960544	NM_199245	VAMP1	vesicle-associated membrane protein 1 (synaptobrevin 1)	6.85324	7.13449	6.68072	6.85313	7.86155	7.79004	7.84837	8.00329	7.54357e-05	0.000228913	-0.995421
7938269	NM_003320	TUB	tubby homolog (mouse)	6.9627	7.06076	7.22379	7.01163	8.05747	8.01683	8.04218	8.12724	3.49059e-06	2.66902e-05	-0.99621
8046346	NM_003642	HAT1	histone acetyltransferase 1	10.0642	10.2284	10.1994	10.3525	11.122	11.2864	11.075	11.3465	2.79787e-05	0.000110085	-0.996361
7961693	NM_002300	LDHB	lactate dehydrogenase B	12.1061	12.0312	12.1635	12.0347	12.9792	13.138	13.031	13.1732	1.87074e-06	1.80167e-05	-0.996476
7936817	NM_024942	C10orf88	chromosome 10 open reading frame 88	7.64932	8.08426	7.43262	8.08946	8.66064	8.90523	8.81807	8.85941	0.00115861	0.00194687	-0.996922
8160756	NM_015397	DCAF12	DDB1 and CUL4 associated factor 12	8.68567	8.73563	8.6827	8.78217	9.69068	9.59533	9.88522	9.7027	4.84236e-06	3.29447e-05	-0.996941
7939825	NM_004551	NDUFS3	NADH dehydrogenase (ubiquinone) Fe-S protein 3, 30kDa (NADH-coenzyme Q reductase)	9.75744	9.77499	9.60808	9.6861	10.6085	10.902	10.5912	10.7139	1.7377e-05	7.87466e-05	-0.99723
8094556	NM_018290	PGM2	phosphoglucomutase 2	9.39231	9.59014	9.47989	9.67368	10.5313	10.7658	10.569	10.2614	0.000169809	0.000420779	-0.99787
8135162	NM_024653	PRKRIP1	PRKR interacting protein 1 (IL11 inducible)	7.12909	7.39542	7.36432	7.39652	8.30741	8.13302	8.40377	8.43469	4.01643e-05	0.000143091	-0.998384
8071332	NM_002882	RANBP1	RAN binding protein 1	9.61371	9.32885	9.60648	9.35635	10.4873	10.5109	10.4447	10.4563	1.49017e-05	7.07451e-05	-0.998458
7923131	NM_001142795	NA	NA	6.6206	6.78374	6.78438	6.83161	7.72093	7.88152	7.68448	7.72809	4.21252e-06	2.99857e-05	-0.998673
8163525	NM_017443	POLE3	polymerase (DNA directed), epsilon 3, accessory subunit	8.64145	8.82718	8.63112	8.74371	9.74206	9.78284	9.73288	9.58064	4.44298e-06	3.11767e-05	-0.998742
8105487	NM_138453	RAB3C	RAB3C, member RAS oncogene family	5.18199	5.1495	5.26494	5.12561	6.11494	6.19924	6.16244	6.24045	2.9186e-07	5.90044e-06	-0.998759
8097957	NM_000856	GUCY1A3	guanylate cyclase 1, soluble, alpha 3	5.29543	4.8415	4.97249	4.9891	6.03245	6.19615	5.99665	5.87054	0.000142668	0.000367752	-0.999317
8043413	NM_144563	RPIA	ribose 5-phosphate isomerase A	7.04198	6.83618	6.83597	6.72559	7.83301	7.80292	7.76456	8.03833	3.17317e-05	0.000120216	-0.999773
7988537	NM_014985	CEP152	centrosomal protein 152kDa	6.95261	7.15613	7.10311	7.28656	8.06241	8.09391	8.19367	8.14858	1.0971e-05	5.70357e-05	-1.00004
7965486	NM_016122	CCDC41	coiled-coil domain containing 41	6.84999	7.19341	6.72603	7.27254	7.84893	7.78643	8.05755	8.35046	0.00157352	0.00250015	-1.00035
8065230	NM_006606	RBBP9	retinoblastoma binding protein 9	7.42111	8.00858	7.35649	8.06819	8.70117	8.77922	8.47709	8.90133	0.0029934	0.00422615	-1.00111
7923086	NM_018136	ASPM	asp (abnormal spindle) homolog, microcephaly associated (Drosophila)	9.33791	9.44272	9.39229	9.50206	10.3487	10.4305	10.4832	10.4189	5.14312e-07	8.06852e-06	-1.00158
8083656	NM_022736	MFSD1	major facilitator superfamily domain containing 1	8.72133	9.14904	8.72215	9.10708	9.80057	9.98749	10.1077	9.81028	0.000361909	0.000764429	-1.00161
8154316	NM_152896	UHRF2	ubiquitin-like with PHD and ring finger domains 2, E3 ubiquitin protein ligase	8.25704	8.39734	8.22154	8.32301	9.15604	9.35039	9.29049	9.409	5.44322e-06	3.55222e-05	-1.00175
7906061	NM_152280	SYT11	synaptotagmin XI	5.61948	5.54615	5.66267	5.33806	6.47955	6.72588	6.41078	6.55733	5.37649e-05	0.00017774	-1.00179
8059538	NM_025243	SLC19A3	solute carrier family 19, member 3	6.05972	6.03738	5.94583	6.0019	7.08725	6.84637	7.17544	6.94501	1.29449e-05	6.43233e-05	-1.00231
7974146	NM_017922	PRPF39	PRP39 pre-mRNA processing factor 39 homolog (S. cerevisiae)	8.01273	8.33499	8.07375	8.39575	9.24881	9.12854	9.16221	9.28759	6.25292e-05	0.000198777	-1.00248
8128429	NM_005190	CCNC	cyclin C	10.6322	10.692	10.5974	10.8052	11.6999	11.7857	11.6022	11.6517	2.93125e-06	2.36113e-05	-1.00317
7905085	NM_001005464	HIST2H3A	histone cluster 2, H3a	10.803	10.496	10.7438	10.4768	11.6245	11.8143	11.6593	11.4354	0.000121496	0.000326015	-1.00349
7919614	NM_001005464	HIST2H3A	histone cluster 2, H3a	10.803	10.496	10.7438	10.4768	11.6245	11.8143	11.6593	11.4354	0.000121496	0.000326015	-1.00349
7960411	NM_020374	C12orf4	chromosome 12 open reading frame 4	9.04048	9.23285	8.96949	9.37668	10.1489	10.3164	10.0138	10.1557	0.000104123	0.000290915	-1.00384
8047854	NM_001142300	CCNYL1	cyclin Y-like 1	7.26717	7.35346	7.4069	7.50598	8.30123	8.16747	8.49613	8.58724	8.31285e-05	0.000246444	-1.00464
7993973	NM_018119	POLR3E	polymerase (RNA) III (DNA directed) polypeptide E (80kD)	7.59462	7.82004	7.89288	7.7865	8.79686	8.702	8.97958	8.6347	5.10243e-05	0.000170835	-1.00477
8039655	NM_001039654	ZNF550	zinc finger protein 550	7.08223	7.28225	7.04209	6.91125	8.18377	7.85373	8.12556	8.17425	9.39332e-05	0.00026964	-1.00487
8042119	NM_022894	PAPOLG	poly(A) polymerase gamma	8.7014	9.01122	8.89129	9.22445	9.892	9.90432	9.93962	10.1141	0.000165519	0.000412383	-1.00543
8099235	NM_203462	MRFAP1L1	Morf4 family associated protein 1-like 1	8.78875	8.76474	8.85424	8.72309	9.81403	9.86664	9.69026	9.78416	6.01364e-07	8.99762e-06	-1.00607
8007799	NR_026680	MGC57346	uncharacterized LOC401884	10.0772	10.335	10.2503	10.3611	11.3011	11.1113	11.3192	11.317	1.72762e-05	7.8372e-05	-1.00623
8125556	NM_033554	HLA-DPA1	major histocompatibility complex, class II, DP alpha 1	7.51507	7.95701	7.70961	7.86044	8.87089	8.74588	8.6416	8.81066	8.69165e-05	0.00025463	-1.00673
8178891	NM_033554	HLA-DPA1	major histocompatibility complex, class II, DP alpha 1	7.51507	7.95701	7.70961	7.86044	8.87089	8.74588	8.6416	8.81066	8.69165e-05	0.00025463	-1.00673
7964089	NM_001127460	PAN2	PAN2 poly(A) specific ribonuclease subunit homolog (S. cerevisiae)	7.6236	7.65992	7.60155	7.67042	8.7856	8.42639	8.68247	8.68891	1.3795e-05	6.70962e-05	-1.00697
8081128	NM_022072	NSUN3	NOP2/Sun domain family, member 3	7.99815	8.26583	8.10567	8.34611	9.15705	9.21078	9.11636	9.26437	2.12114e-05	9.04909e-05	-1.0082
8130916	NM_018288	PHF10	PHD finger protein 10	8.87882	8.89672	8.86708	8.81547	9.72709	9.82615	10.0498	9.88801	6.95734e-06	4.1979e-05	-1.00825
8180397	NM_016489	NT5C3	5'-nucleotidase, cytosolic III	7.97288	8.31419	8.27664	8.35943	9.16	9.14697	9.34883	9.30152	5.89333e-05	0.000190476	-1.00855
7924476	NM_005681	TAF1A	TATA box binding protein (TBP)-associated factor, RNA polymerase I, A, 48kDa	6.44715	6.66245	6.4425	6.78246	7.45112	7.56339	7.45436	7.90112	0.000299188	0.000657784	-1.00886
8012918	NM_173622	NA	NA	5.72573	5.94413	5.89354	6.09709	6.97965	6.70788	6.78879	7.2209	0.000325778	0.000702816	-1.00918
7932285	NM_024948	FAM188A	family with sequence similarity 188, member A	7.80723	8.16536	7.94145	8.20521	8.91386	8.98335	9.07402	9.18524	9.93649e-05	0.000280939	-1.0093
8060813	NM_032485	MCM8	minichromosome maintenance complex component 8	9.78243	10.2489	9.7717	10.427	10.8461	11.0182	11.2432	11.1632	0.00168475	0.00263871	-1.01016
8005029	NM_003010	MAP2K4	mitogen-activated protein kinase kinase 4	8.29743	8.34258	8.51509	8.52241	9.43712	9.479	9.46352	9.33932	4.92711e-06	3.31042e-05	-1.01036
8080419	NM_206825	GNL3	guanine nucleotide binding protein-like 3 (nucleolar)	9.69305	9.77112	9.81781	9.76751	10.7443	10.766	10.8312	10.7496	7.54808e-08	2.64398e-06	-1.01039
7913644	NM_004091	E2F2	E2F transcription factor 2	6.0379	5.75422	6.03617	5.85212	7.0124	6.66876	7.11043	6.93059	0.000139221	0.000361271	-1.01044
8061483	NR_004846	LOC100134868	uncharacterized LOC100134868	7.04753	7.20422	6.98988	7.48784	8.28658	7.97657	8.09287	8.41551	0.000491172	0.000972845	-1.01051
7899096	NM_015871	ZNF593	zinc finger protein 593	8.18951	8.19753	8.20448	8.17847	9.23018	9.49946	9.00759	9.07762	8.92824e-05	0.000259392	-1.01122
7957467	NM_001009894	C12orf29	chromosome 12 open reading frame 29	9.28108	9.22456	9.23777	9.18507	10.2771	10.4896	10.106	10.1031	3.69921e-05	0.000134033	-1.01183
7916316	NM_018087	TMEM48	transmembrane protein 48	9.62166	9.59984	9.51751	9.5942	10.6383	10.5575	10.6115	10.5751	3.7305e-08	1.7232e-06	-1.01227
7945058	NM_024556	FAM118B	family with sequence similarity 118, member B	9.51802	9.63832	9.56963	9.76635	10.723	10.8942	10.5573	10.3672	0.000189482	0.00046023	-1.01235
7943126	NM_033395	KIAA1731	KIAA1731	8.27809	8.62792	8.32547	8.46388	9.36586	9.52018	9.41597	9.44344	2.11458e-05	9.02926e-05	-1.01252
8120883	NM_015018	DOPEY1	dopey family member 1	7.28172	7.80629	7.42433	7.80543	8.58386	8.62294	8.64961	8.51411	0.000315368	0.00068568	-1.01319
7961287	NM_176888	TAS2R19	taste receptor, type 2, member 19	6.13067	7.05538	6.49848	7.03909	7.5722	7.68781	7.84687	7.66949	0.00469063	0.00614445	-1.01319
7990566	NM_000126	ETFA	electron-transfer-flavoprotein, alpha polypeptide	9.12536	8.95794	9.23033	9.0635	10.0703	10.2122	10.0584	10.0934	5.2635e-06	3.47518e-05	-1.01431
8021716	NM_014177	TIMM21	translocase of inner mitochondrial membrane 21 homolog (yeast)	7.09049	7.23232	7.04489	7.27905	8.04703	8.2774	8.14922	8.23225	1.04466e-05	5.53304e-05	-1.01479
8142110	NM_006754	SYPL1	synaptophysin-like 1	8.23728	8.69263	8.39186	8.59713	9.27738	9.6519	9.32213	9.72927	0.000572384	0.0011	-1.01544
8120552	NM_001105531	FAM135A	family with sequence similarity 135, member A	8.31546	8.57882	8.40117	8.67464	9.31991	9.53507	9.6126	9.56488	6.749e-05	0.000210418	-1.01559
7996341	NM_020786	PDP2	pyruvate dehyrogenase phosphatase catalytic subunit 2	7.2544	7.94693	7.6388	8.01636	8.61864	8.58645	8.78729	8.92898	0.00180137	0.00278235	-1.01622
8095545	NM_001037442	RUFY3	RUN and FYVE domain containing 3	7.80555	8.25643	7.92475	8.40476	8.93891	9.06199	9.21192	9.24479	0.000638777	0.0012028	-1.01653
8161288	NM_033655	CNTNAP3	contactin associated protein-like 3	6.61142	6.51901	6.59671	6.53122	7.61601	7.52746	7.63701	7.54411	1.17371e-07	3.46582e-06	-1.01656
8110090	NM_022754	SFXN1	sideroflexin 1	10.4223	10.4063	10.4995	10.3812	11.4762	11.2027	11.5704	11.5271	2.30214e-05	9.57695e-05	-1.0168
8013641	NM_033198	PIGS	phosphatidylinositol glycan anchor biosynthesis, class S	8.28595	8.47647	8.24454	8.50811	9.28419	9.2334	9.68753	9.37716	0.000158435	0.000398564	-1.0168
7963575	NM_001417	EIF4B	eukaryotic translation initiation factor 4B	8.26049	8.21677	8.02709	8.14671	9.17638	9.27077	9.26355	9.00827	1.40204e-05	6.7879e-05	-1.01697
7967030	NR_003925	RNU4-1	RNA, U4 small nuclear 1	10.1059	9.23014	10.3045	8.87009	10.7135	11.1005	10.5056	10.259	0.0392483	0.0352133	-1.017
7943231	NM_017704	ANKRD49	ankyrin repeat domain 49	8.18448	8.58613	8.2663	8.5898	9.31347	9.57328	9.25326	9.55606	0.000273214	0.000612524	-1.01734
7968658	NM_181503	EXOSC8	exosome component 8	9.30074	9.78666	9.40139	9.90711	10.5555	10.7094	10.3524	10.848	0.00136087	0.00222304	-1.01736
8075182	NM_005080	XBP1	X-box binding protein 1	10.5111	10.6184	10.5031	10.5947	11.6354	11.4951	11.5844	11.5839	2.90695e-07	5.89603e-06	-1.0179
8101718	NM_032906	PIGY	phosphatidylinositol glycan anchor biosynthesis, class Y	9.69872	9.5146	9.75382	9.61602	10.6475	10.8456	10.4121	10.75	7.57526e-05	0.000229445	-1.01802
7919589	NM_001123375	HIST2H3D	histone cluster 2, H3d	11.3984	11.1188	11.3891	11.0931	12.2798	12.4887	12.2702	12.0333	0.000183041	0.000447201	-1.01816
8102789	NM_003218	TERF1	telomeric repeat binding factor (NIMA-interacting) 1	8.01592	8.37964	7.90962	8.58273	9.12998	9.27509	9.13551	9.42421	0.00101604	0.00174851	-1.01922
8114193	NM_001033503	SAR1B	SAR1 homolog B (S. cerevisiae)	9.53954	9.79671	9.69164	9.81144	10.517	10.8091	10.6291	10.962	0.000123268	0.000330019	-1.01947
8040440	NM_182625	GEN1	Gen endonuclease homolog 1 (Drosophila)	8.08622	8.48026	8.18926	8.43771	9.15708	9.37578	9.53798	9.20867	0.000213182	0.000503546	-1.02151
7916898	NM_001114120	DEPDC1	DEP domain containing 1	9.05644	9.21832	9.05906	9.43565	10.228	9.98719	10.2088	10.4316	0.000201897	0.000482119	-1.02154
7930870	NM_020243	TOMM22	translocase of outer mitochondrial membrane 22 homolog (yeast)	10.9434	11.0371	10.6945	11.1072	12.1735	11.8476	12.0224	11.8289	0.000152041	0.000386228	-1.02252
8169056	NM_182541	TMEM31	transmembrane protein 31	5.48692	5.20438	5.45403	5.34544	6.42896	6.36598	6.34311	6.44398	5.53767e-06	3.58319e-05	-1.02282
7946957	NM_138421	SAAL1	serum amyloid A-like 1	8.91035	8.91851	9.05025	9.00974	9.99808	10.1444	9.94761	9.89123	3.89687e-06	2.84699e-05	-1.02312
7968637	NM_003914	CCNA1	cyclin A1	6.02043	6.21371	6.0987	6.12719	7.03726	7.30688	7.14965	7.05901	8.30104e-06	4.70218e-05	-1.02319
8155414	NR_003366	ANKRD20A8P	ankyrin repeat domain 20 family, member A8, pseudogene	6.47598	7.05862	6.34588	7.37367	7.87676	7.50435	7.81247	8.156	0.0101408	0.011664	-1.02386
8083757	NM_015938	NMD3	NMD3 homolog (S. cerevisiae)	9.39828	9.29025	9.22645	9.30673	10.2673	10.4785	10.3448	10.2295	4.30502e-06	3.0506e-05	-1.02459
8116760	NM_031480	RIOK1	RIO kinase 1	9.08922	9.27759	9.27115	9.43278	10.2358	10.2043	10.3486	10.381	1.63386e-05	7.53852e-05	-1.02476
8046169	NM_004792	PPIG	peptidylprolyl isomerase G (cyclophilin G)	7.48441	7.65899	7.67888	7.8434	8.64639	8.69134	8.59914	8.82856	2.49559e-05	0.000101235	-1.02494
8114396	NM_004661	CDC23	cell division cycle 23	9.02231	9.02691	9.13543	9.05706	10.2016	10.0438	9.99169	10.106	1.12335e-06	1.3284e-05	-1.02534
7976160	NM_018319	TDP1	tyrosyl-DNA phosphodiesterase 1	8.63504	8.6637	8.48751	8.65203	9.69815	9.67117	9.61738	9.55549	1.07523e-06	1.29156e-05	-1.02598
8161632	NM_001099666	PTAR1	protein prenyltransferase alpha subunit repeat containing 1	10.2151	10.62	10.3019	10.667	11.4022	11.5327	11.4669	11.5071	0.00011865	0.000320596	-1.02619
8173261	NM_001178032	ZC4H2	zinc finger, C4H2 domain containing	7.10964	7.54382	7.05301	7.60622	8.33285	7.97054	8.37955	8.73489	0.00289341	0.00410961	-1.02628
8010737	NM_005052	RAC3	ras-related C3 botulinum toxin substrate 3 (rho family, small GTP binding protein Rac3)	8.56421	8.61993	8.56651	8.6081	9.64553	9.71667	9.49093	9.61076	7.96084e-07	1.06258e-05	-1.02629
8083447	NM_002563	P2RY1	purinergic receptor P2Y, G-protein coupled, 1	6.82116	6.35621	6.65706	6.45507	7.56369	7.64419	7.62517	7.56369	6.93345e-05	0.00021462	-1.02681
8073135	NM_019008	SMCR7L	Smith-Magenis syndrome chromosome region, candidate 7-like	7.7086	7.90572	7.75448	7.82689	8.8799	8.68513	8.88962	8.84862	3.83055e-06	2.8125e-05	-1.0269
8009552	NM_017941	C17orf80	chromosome 17 open reading frame 80	7.54226	7.91564	7.4021	7.97555	8.85254	8.84073	8.6276	8.62306	0.000550944	0.00106591	-1.0271
7989968	NM_033429	CALML4	calmodulin-like 4	7.20299	7.11874	7.08733	7.28329	8.23951	8.1631	8.20612	8.19395	5.87017e-07	8.8672e-06	-1.02758
8160835	NM_148179	RPP25L	ribonuclease P/MRP 25kDa subunit-like	7.33467	7.59198	7.73939	7.77072	8.69981	8.74258	8.53941	8.56752	9.00006e-05	0.000261128	-1.02814
8097692	NM_001957	EDNRA	endothelin receptor type A	6.01757	6.4784	6.25143	6.60539	7.20961	7.47063	7.43861	7.34697	0.000353965	0.000751939	-1.02826
7991070	NM_016073	HDGFRP3	hepatoma-derived growth factor, related protein 3	9.28664	9.66135	9.33623	9.74813	10.4797	10.674	10.5047	10.4883	0.000167914	0.000417067	-1.02857
8046975	NM_032168	WDR75	WD repeat domain 75	9.61856	9.98881	9.57905	10.0461	10.7888	10.9545	10.9101	10.6943	0.000268834	0.000604692	-1.02879
7950683	NM_024678	NARS2	asparaginyl-tRNA synthetase 2, mitochondrial (putative)	8.36981	8.56618	8.52454	8.66738	9.43923	9.66492	9.39236	9.74737	6.83318e-05	0.000212175	-1.02899
8052698	NM_006333	C1D	C1D nuclear receptor corepressor	7.92432	8.37979	8.01635	8.50746	9.12858	9.50128	9.00919	9.30486	0.00112606	0.00190326	-1.029
8003204	NM_016095	GINS2	GINS complex subunit 2 (Psf2 homolog)	9.8976	10.0868	10.1543	10.1562	11.0762	11.1505	11.0243	11.1628	5.72737e-06	3.65304e-05	-1.02971
7929383	NM_001134658	SLC35G1	solute carrier family 35, member G1	7.80909	7.96852	8.00641	8.03242	8.86111	8.95242	9.03565	9.08757	6.43689e-06	3.97454e-05	-1.03008
8070010	NM_003895	SYNJ1	synaptojanin 1	6.35928	6.61415	6.5592	6.78225	7.59222	7.43288	7.69728	7.71319	7.76265e-05	0.000233375	-1.03018
7922008	NM_053053	TADA1	transcriptional adaptor 1	7.8679	7.88759	8.08343	7.8832	8.98452	8.85055	9.0172	8.99454	3.47646e-06	2.66293e-05	-1.03118
7946280	NM_003696	OR6A2	olfactory receptor, family 6, subfamily A, member 2	4.24456	4.21407	4.42786	4.42358	5.64051	5.02614	5.38723	5.38098	0.000303114	0.000664837	-1.0312
8036324	NM_001012756	ZNF260	zinc finger protein 260	8.30968	8.76038	8.3779	8.80643	9.54849	9.51752	9.57409	9.73917	0.000287684	0.00063714	-1.03121
7970569	NM_014363	SACS	spastic ataxia of Charlevoix-Saguenay (sacsin)	8.73999	8.91238	8.75791	9.02561	9.82061	9.81942	10.0345	9.88714	1.83958e-05	8.20439e-05	-1.03145
7968484	NM_000059	BRCA2	breast cancer 2, early onset	8.44242	8.60373	8.46197	8.6447	9.56157	9.52784	9.59338	9.59641	1.1918e-06	1.38408e-05	-1.0316
7929201	NM_003972	BTAF1	BTAF1 RNA polymerase II, B-TFIID transcription factor-associated, 170kDa (Mot1 homolog, S. cerevisiae)	9.59139	9.75918	9.71929	9.77212	10.7029	10.6712	10.7946	10.8004	1.13217e-06	1.33613e-05	-1.03179
8071206	NM_003776	MRPL40	mitochondrial ribosomal protein L40	8.64258	8.99596	8.64068	9.01441	9.84822	9.98794	9.72007	9.86886	0.000125951	0.000335538	-1.03287
8005305	NM_024052	GID4	GID complex subunit 4, VID24 homolog (S. cerevisiae)	7.40923	7.55468	7.51775	7.6489	8.69642	8.44366	8.58509	8.5369	7.32937e-06	4.35532e-05	-1.03288
8141024	NM_005868	BET1	blocked early in transport 1 homolog (S. cerevisiae)	8.41909	8.45802	8.46338	8.37766	9.39291	9.56847	9.24413	9.64452	2.98835e-05	0.000115614	-1.03297
8161326	NM_033160	ZNF658	zinc finger protein 658	6.16538	6.25189	6.00343	6.51985	7.20458	7.34295	7.11127	7.41404	0.000190517	0.000462398	-1.03307
8091715	NM_020169	LXN	latexin	4.34734	4.35244	4.13715	4.46835	5.23248	5.21741	5.21465	5.77502	0.000544016	0.00105566	-1.03357
8111788	NM_012382	TTC33	tetratricopeptide repeat domain 33	7.0802	7.14617	6.86782	7.33148	8.32616	8.30256	7.85603	8.07542	0.000398032	0.000823549	-1.03363
8171516	NM_002893	RBBP7	retinoblastoma binding protein 7	11.535	11.5812	11.5662	11.6028	12.6942	12.5949	12.5834	12.5482	8.96973e-08	2.9885e-06	-1.03384
8072979	NM_021974	POLR2F	polymerase (RNA) II (DNA directed) polypeptide F	9.49345	9.2465	9.43558	9.34522	10.4023	10.664	10.1904	10.3996	8.67147e-05	0.000254212	-1.03388
8009366	NM_015462	NOL11	nucleolar protein 11	9.53317	9.90089	9.68468	9.97004	10.8534	11.0177	10.6411	10.7124	0.000212149	0.000501746	-1.03398
7908003	NM_030769	NPL	N-acetylneuraminate pyruvate lyase (dihydrodipicolinate synthase)	5.46402	5.33597	5.39059	5.18947	6.28387	6.44256	6.2804	6.50991	1.50981e-05	7.13898e-05	-1.03417
7969438	NM_005358	LMO7	LIM domain 7	5.12887	5.565	5.49401	5.60261	6.38773	6.13125	6.60083	6.80933	0.00125473	0.00207912	-1.03466
7957633	NM_006838	METAP2	methionyl aminopeptidase 2	9.60422	9.69632	9.73478	9.77746	10.7359	10.7741	10.6818	10.7606	3.00702e-07	5.98658e-06	-1.03491
7982294	NM_130901	OTUD7A	OTU domain containing 7A	6.17805	6.14715	6.01412	6.37304	7.0012	7.33796	7.14131	7.37167	0.000101496	0.000285433	-1.03494
8001876	NM_001018159	NAE1	NEDD8 activating enzyme E1 subunit 1	10.0392	10.178	10.181	10.276	11.0838	11.3134	11.0923	11.3283	1.62873e-05	7.52289e-05	-1.0359
7974533	NM_021255	PELI2	pellino E3 ubiquitin protein ligase family member 2	6.65521	6.35779	6.4631	6.33842	7.38601	7.52254	7.69669	7.35339	6.82416e-05	0.000211996	-1.03603
7899829	NM_022753	S100PBP	S100P binding protein	7.55947	7.94005	7.60031	7.7942	8.76926	8.73996	8.864	8.66777	4.0469e-05	0.000144014	-1.03674
8147461	NM_002998	SDC2	syndecan 2	8.38991	8.35873	8.30866	8.4216	9.36598	9.52465	9.29057	9.44827	1.60592e-06	1.65308e-05	-1.03764
8068200	NR_026845	C21orf119	chromosome 21 open reading frame 119	7.60356	7.56338	7.56614	7.39037	8.73339	8.69874	8.33137	8.51332	5.9684e-05	0.000192303	-1.03834
8101237	NM_001040202	PAQR3	progestin and adipoQ receptor family member III	7.01475	7.17109	7.14313	7.07813	8.02707	8.2085	8.18231	8.1451	1.16211e-06	1.36058e-05	-1.03897
8160295	NR_003009	SCARNA8	small Cajal body-specific RNA 8	7.58546	7.38925	7.75216	7.22857	8.42864	8.57692	8.51405	8.59513	0.000131331	0.000346612	-1.03983
7926916	NM_030751	ZEB1	zinc finger E-box binding homeobox 1	8.17832	8.37435	8.09716	8.41161	9.17552	9.39587	9.22213	9.43009	4.2581e-05	0.000149429	-1.04054
8119529	NM_015255	UBR2	ubiquitin protein ligase E3 component n-recognin 2	8.4186	8.81958	8.4938	8.84085	9.5501	9.6372	9.77068	9.7778	0.000143949	0.000370097	-1.04073
7954940	NM_016488	PPHLN1	periphilin 1	8.98742	9.19835	9.19457	9.16513	10.1372	10.1313	10.1304	10.3136	4.69364e-06	3.22375e-05	-1.04176
7905589	NM_015607	CHTOP	chromatin target of PRMT1	8.6611	8.6118	8.6286	8.49798	9.67544	9.6547	9.61942	9.61698	1.60709e-07	4.11461e-06	-1.04177
8057719	NM_014362	HIBCH	3-hydroxyisobutyryl-CoA hydrolase	7.05392	7.06546	7.04486	7.11209	8.15015	8.01604	7.9249	8.35554	3.34316e-05	0.000124438	-1.04257
7918379	NM_000849	GSTM3	glutathione S-transferase mu 3 (brain)	8.03045	8.17037	8.06217	8.13924	9.25985	9.29473	9.0437	8.97669	1.79775e-05	8.0678e-05	-1.04318
8051528	NM_005760	CEBPZ	CCAAT/enhancer binding protein (C/EBP), zeta	7.17521	7.44103	7.31917	7.48752	8.3612	8.42522	8.37993	8.43135	6.72018e-06	4.0947e-05	-1.04369
8168762	NM_001325	CSTF2	cleavage stimulation factor, 3' pre-RNA, subunit 2, 64kDa	7.72928	7.76143	7.73772	7.68943	8.70551	8.77341	8.86556	8.7489	1.30451e-07	3.65956e-06	-1.04388
8125919	NM_001145775	FKBP5	FK506 binding protein 5	7.17683	7.60319	7.43124	7.70767	8.33077	8.54848	8.45519	8.76129	0.000395054	0.000818956	-1.0442
8038029	NM_014959	CARD8	caspase recruitment domain family, member 8	6.72777	6.96675	6.62158	6.8843	7.89369	7.68001	7.91768	7.88729	3.39246e-05	0.000125754	-1.04457
8156935	NM_003452	ZNF189	zinc finger protein 189	7.03191	7.42071	7.04955	7.28852	8.0914	8.12063	8.32522	8.43505	0.000162515	0.000406304	-1.0454
8180348	NM_002995	XCL1	chemokine (C motif) ligand 1	5.37438	5.24436	5.11644	5.12157	6.09409	6.56525	6.18959	6.19089	0.000131047	0.000346126	-1.04577
7967386	NM_022782	MPHOSPH9	M-phase phosphoprotein 9	9.47796	9.80512	9.52372	9.88917	10.7594	10.6524	10.6966	10.7708	6.11307e-05	0.000195433	-1.04582
7919612	NM_001123375	HIST2H3D	histone cluster 2, H3d	11.5769	11.2885	11.5358	11.2303	12.4609	12.667	12.4754	12.2128	0.000175987	0.000433546	-1.04613
8046848	NM_018471	ZC3H15	zinc finger CCCH-type containing 15	10.6593	10.6919	10.7586	10.7823	11.7063	11.8187	11.7669	11.7847	1.29935e-07	3.65956e-06	-1.04614
7939424	NM_001142930	API5	apoptosis inhibitor 5	10.8459	10.9449	10.7854	11.0357	11.9144	11.8241	12.0237	12.036	8.04022e-06	4.60476e-05	-1.04657
7993833	NM_016025	METTL9	methyltransferase like 9	9.37677	9.6225	9.49315	9.59242	10.4717	10.6699	10.5446	10.5869	5.27807e-06	3.48125e-05	-1.04706
7921987	NM_019026	TMCO1	transmembrane and coiled-coil domains 1	10.2074	10.3381	10.1488	10.4568	11.3624	11.5752	11.2128	11.1948	8.32125e-05	0.000246566	-1.04854
8129728	NM_001134831	AHI1	Abelson helper integration site 1	7.16823	7.59226	7.34665	7.63803	8.40167	8.4418	8.51859	8.57736	0.00010619	0.00029458	-1.04856
8168843	NM_021029	RPL36A	ribosomal protein L36a	10.2408	10.5311	10.2677	10.6034	11.3156	11.6579	11.3012	11.5627	0.000178522	0.00043848	-1.04864
8017150	NM_016261	TUBD1	tubulin, delta 1	6.83283	7.46153	6.81136	7.28805	8.14588	8.10951	8.09801	8.23503	0.000744526	0.00135755	-1.04866
8081158	NM_032146	ARL6	ADP-ribosylation factor-like 6	6.23949	6.76283	6.47622	6.78785	7.28822	7.6439	7.67101	7.85888	0.00100731	0.00173676	-1.0489
7925691	NM_003431	ZNF124	zinc finger protein 124	7.18221	7.30409	7.52592	7.55913	8.35886	8.67101	8.24707	8.49092	0.000179682	0.000440391	-1.04913
7980403	NM_022067	VIPAS39	VPS33B interacting protein, apical-basolateral polarity regulator, spe-39 homolog	7.42086	7.76198	7.5918	7.7084	8.78695	8.58862	8.56322	8.74106	3.01386e-05	0.000116288	-1.0492
8031825	NM_024762	ZNF552	zinc finger protein 552	7.90155	8.24319	7.97455	8.46563	9.35001	8.72814	9.42167	9.2824	0.00215366	0.00322168	-1.04933
8116128	NR_026921	LOC202181	SUMO-interacting motifs containing 1 pseudogene	6.46141	6.34516	6.37457	6.5199	7.40242	7.27397	7.81984	7.40283	0.00015908	0.000400032	-1.0495
7908867	NM_138391	TMEM183A	transmembrane protein 183A	9.9188	10.0217	9.81999	10.049	11.0276	11.1191	10.9168	10.9441	5.26741e-06	3.47599e-05	-1.04955
8089993	NM_019069	WDR5B	WD repeat domain 5B	6.98239	7.06264	7.14434	7.06805	8.08841	8.19609	8.01845	8.15537	8.6565e-07	1.11604e-05	-1.05022
7967881	NM_017520	MPHOSPH8	M-phase phosphoprotein 8	6.8972	7.05601	7.11135	7.05133	7.91612	8.06442	8.13233	8.20635	9.62835e-06	5.2285e-05	-1.05083
7926345	NM_183005	RPP38	ribonuclease P/MRP 38kDa subunit	8.13696	8.41472	8.04347	8.42848	9.25557	9.38201	9.13283	9.45883	0.000128783	0.000341259	-1.0514
7926545	NM_032812	PLXDC2	plexin domain containing 2	6.9992	7.56068	7.07395	7.49513	8.37697	8.34671	8.25506	8.35706	0.000359749	0.000761853	-1.05171
8102076	NM_001813	CENPE	centromere protein E, 312kDa	8.68	9.12441	8.79166	9.25237	9.87374	10.117	9.93262	10.1335	0.000420636	0.000859377	-1.05209
8104680	NM_018356	C5orf22	chromosome 5 open reading frame 22	8.94629	9.23026	9.03515	9.33221	10.1454	10.2405	10.033	10.3375	7.31706e-05	0.00022361	-1.05313
7922243	NM_033418	METTL18	methyltransferase like 18	6.83425	7.05924	6.94122	7.01417	8.07521	8.29505	7.74014	7.95142	0.000159487	0.0004009	-1.05324
8154670	NM_025103	IFT74	intraflagellar transport 74 homolog (Chlamydomonas)	6.8617	7.23567	7.05017	7.68766	8.27461	8.23681	8.1308	8.40647	0.00129821	0.00213929	-1.05337
7939158	NM_001076786	QSER1	glutamine and serine rich 1	9.73187	10.3182	9.80949	10.4413	11.058	11.1302	11.1779	11.1487	0.00110282	0.0018705	-1.05347
8112668	NM_016591	GCNT4	glucosaminyl (N-acetyl) transferase 4, core 2	4.99421	4.53069	4.86899	4.68099	5.82008	6.01811	5.74309	5.7114	0.000139696	0.000362012	-1.05445
8099107	NM_017816	LYAR	Ly1 antibody reactive	7.96387	8.05538	7.89205	8.12114	8.91832	8.84445	9.11514	9.37266	0.000175577	0.000432783	-1.05453
7899943	NM_024772	ZMYM1	zinc finger, MYM-type 1	7.88954	8.13495	7.97644	8.06428	9.07948	8.98608	9.0826	9.13686	2.57946e-06	2.16945e-05	-1.05495
8174228	NM_153333	TCEAL8	transcription elongation factor A (SII)-like 8	7.37881	7.28354	7.42677	7.26684	8.26872	8.48278	8.36639	8.45881	2.62905e-06	2.20016e-05	-1.05519
7903908	NM_006090	CEPT1	choline/ethanolamine phosphotransferase 1	9.87586	10.1028	9.9806	10.1273	11.1026	11.3113	10.8618	11.0332	7.22246e-05	0.000221293	-1.05555
8173269	NM_031206	LAS1L	LAS1-like (S. cerevisiae)	8.46947	8.29879	8.32776	8.23126	9.5575	9.22708	9.39822	9.36806	1.58471e-05	7.38537e-05	-1.0559
8171587	NM_000292	PHKA2	phosphorylase kinase, alpha 2 (liver)	7.3048	7.62253	7.60172	7.57923	8.46373	8.50088	8.67715	8.69098	3.15723e-05	0.000119858	-1.05612
8147172	NM_003909	CPNE3	copine III	10.4207	10.5402	10.5013	10.6816	11.5691	11.6393	11.6028	11.5601	1.66394e-06	1.67561e-05	-1.05689
8053737	NR_003366	ANKRD20A8P	ankyrin repeat domain 20 family, member A8, pseudogene	6.257	6.74852	5.92745	7.08108	7.53423	7.44124	7.4948	7.77205	0.00735609	0.00894193	-1.05707
8069620	NM_080794	MRPL39	mitochondrial ribosomal protein L39	10.0763	10.2091	10.213	10.1548	11.2043	11.3362	11.0913	11.2506	2.1832e-06	1.95952e-05	-1.05727
8173208	NM_001012968	SPIN4	spindlin family, member 4	7.5997	7.78069	7.61339	7.62118	8.73664	8.52805	8.7956	8.78442	8.26126e-06	4.68579e-05	-1.05744
8022856	NM_003787	NOL4	nucleolar protein 4	5.05112	4.97047	5.02911	4.79519	5.72253	6.21993	6.33118	5.80322	0.00060425	0.00114796	-1.05774
8035765	NM_021030	ZNF14	zinc finger protein 14	5.43676	5.67407	5.57609	5.83124	6.43149	6.81501	6.53932	6.96344	0.000377194	0.000790245	-1.05777
7899884	NM_145238	ZSCAN20	zinc finger and SCAN domain containing 20	6.46846	6.48856	6.58682	6.51875	7.53029	7.55425	7.61724	7.59206	5.40781e-08	2.14337e-06	-1.05781
8001423	NM_015272	RPGRIP1L	RPGRIP1-like	7.28451	7.4541	7.30688	7.44841	8.36355	8.34051	8.54756	8.47473	3.8323e-06	2.8125e-05	-1.05811
8023252	NM_000985	RPL17	ribosomal protein L17	6.77255	6.70178	6.69433	6.57988	7.74507	7.72725	7.62838	7.88189	3.61813e-06	2.72679e-05	-1.05852
7977472	NM_001005239	OR11H1	olfactory receptor, family 11, subfamily H, member 1	5.8142	5.90731	5.75687	5.9588	6.79944	6.93109	6.97894	6.96237	2.34402e-06	2.04912e-05	-1.05866
8051820	NM_022065	THADA	thyroid adenoma associated	7.99988	8.46955	8.35488	8.53685	9.33974	9.34911	9.47151	9.43577	0.000140532	0.000363547	-1.05874
7947991	NM_015231	NUP160	nucleoporin 160kDa	8.61713	8.68358	8.60839	8.6777	9.72054	9.55239	9.83209	9.71763	2.31881e-06	2.03294e-05	-1.05896
[truncated: 1,333 more rows]
